# Supplementary material for: New signaling pathways govern the host response to C. albicans infection in various niches
Source: HighWire-hosted journal article supplement (doi:10.1101/gr.187427.114), 2015-04-09
Supplement: Supplemental_Legends.docx [file Supplemental_Legends.docx]

**Figure S1.Computational pipeline for analysis of RNA-seq data.** The schematic illustrates the experimental and computational steps used to identify changes in gene expression that occur during the interaction between *C. albicans* and host cells during in vitro infection.

**Figure S2. Transcriptional responses of host cells to *C. albicans* infection.** (A) Heat maps depicting the relative expression of all 792 genes that were found to be differentially expressed in at least 1 of the in vitro experiments. Values represent log (base 2) fold change expression relative to uninfected controls (RNA-seq expression values during infection divided by expression during mock infection). Yellow indicates increased expression during infection; blue indicates reduced expression during infection. (B) Schematic depicting the overlap in host gene expression between endothelial cells and epithelial cells at each timepoint.

**Figure S3. PDFGR and NEDD9 do not mediate cadherin expression.** Immunoblot of whole cell lysates following transfection with siRNAs targeted against PDGFRB or NEDD9.

**Figure S4. SYNV1, ERBB2, and SELPLGP-target genes are induced during clinical episode4 of vaginal candidiasis.** Heatmaps depicting the expression (normalized RPKMs) of SYVN1, ERBB2 and SELPLG-target genes with a minimum 1.5 fold change between the healthy samples (NS) and diseased (VC). “NS” indicates that no symptons were observed during sample collection. “VC” indicates that the sample was collected during an episode of vaginal candidiasis. Please refer to Figure 6, panel A for a schematic of the experimental set up.

**SUPPLEMENTARY TABLES**

**Table S1.** RNA-seq mapping statistics for each organism in each *in vitro* infection.

**Table S2.** List of differentially expressed *C. albicans* genes for strain SC5314 in each *in vitro* experiment as well as the corresponding fold changes in gene expression.

**Table S3.** List of differentially expressed *C. albicans* genes for strain WO-1 in each *in vitro* experiment as well as the corresponding fold changes in gene expression.

**Table S4.** List of 11 genes with matching expression in both SC5314 and WO-1.

**Table S5.** Differentially expressed host genes in each *in vitro* experiment as well as the corresponding fold changes in gene expression.

**Table S6.** Results for Upstream Regulator Analysis for each of the *in vitro* infections.

**Table S7.** Differentially expressed mouse genes in the mouse kidney 24 hours post infection with *C. albicans* as well as the corresponding fold changes in gene expression.

**Table S8.** Results for Upstream Regulator Analysis for each of the *in vivo* mouse kidney infections.

**Table S9.** RNA-seq mapping statistics for vaginal swabs.

**Table S10.** List of *C. albicans* strains used in this study.

**Table S11.** List of oligonucleotides use for qRT-PCR in this study.
