# Supplementary material for: New signaling pathways govern the host response to C. albicans infection in various niches
Source: HighWire-hosted journal article supplement (doi:10.1101/gr.187427.114), 2015-04-09
Supplement: TableS1.docx [file TableS1.docx]

| **Table S1.** RNA-seq mapping statistics for each organism in each *in vitro* infection. | | | | |  |
| --- | --- | --- | --- | --- | --- |
| **Experiement** | **Replicate** | ***C. albicans* Strain** | **Total Reads obtained** | **# of reads that mapped to Human** | **# of reads that mapped to a C. albicans** |
| HUVEC; 1.5 h | 1 | SC5314 | 340,996,244 | 179,176,941 | 101,656,094 |
| 2 | WO-1 | 345,259,146 | 249,651,336 | 32,002,072 |
| 3 | WO-1 | 330,913,446 | 150,341,894 | 100,718,856 |
| HUVEC; 5 h | 1 | SC5314 | 327,221,924 | 8,833,650 | 272,765,934 |
| 2 | WO-1 | 346,280,976 | 195,726,728 | 105,376,053 |
| 3 | WO-1 | 324,640,030 | 35,175,063 | 221,870,442 |
| HUVEC; 8 h | 1 | SC5314 | 340,031,834 | 11,193,427 | 284,561,667 |
| 2 | WO-1 | 326,796,674 | 182,868,336 | 105,548,134 |
| 3 | WO-1 | 330,620,950 | 34,239,089 | 222,979,515 |
| OKF6; 1.5 h | 1 | SC5314 | 356,488,266 | 208,185,253 | 67,407,493 |
| 2 | WO-1 | 340,206,510 | 197,725,317 | 82,377,646 |
| 3 | WO-1 | 349,933,834 | 203,847,236 | 90,024,864 |
| OKF6; 5 h | 1 | SC5314 | 401,321,026 | 115,163,546 | 214,219,503 |
| 2 | WO-1 | 389,933,834 | 133,993,209 | 156,129,149 |
| 3 | WO-1 | 339,399,848 | 106,427,059 | 161,247,666 |
| OKF6; 8 h | 1 | SC5314 | 126,006,082 | 26,767,379 | 74,877,267 |
| 2 | SC5314 | 385,259,146 | 39,323,821 | 263,334,352 |
| 3 | WO-1 | 336,753,084 | 134,604,771 | 168,574,923 |
| 4 | WO-1 | 250,116,900 | 66,740,682 | 121,894,153 |
| HUVEC only | 1 | - | 389,272,500 | 305,956,093 | - |
| 2 | - | 341,616,316 | 286,744,334 | - |
| 3 | - | 336,382,234 | 257,518,636 | - |
| OKF6 only | 1 | - | 373,649,882 | 281,157,005 | - |
| 2 | - | 432,066,308 | 382,972,187 | - |
| 3 | - | 314,250,034 | 211,637,223 | - |
| HUVEC media only; 1.5 h | 1 | SC5314 | 87,102,328 | - | 75,768,202 |
| 2 | 90,153,104 | - | 79,068,840 |
| OKF6 media only; 1.5 h | 1 | SC5314 | 82,143,666 | - | 71,437,974 |
| 2 | 77,729,730 | - | 68,887,712 |
| HUVEC media only; 5 h | 1 | SC5314 | 80,879,564 | - | 68,284,847 |
| 2 | 83,487,960 | - | 74,362,683 |
| OKF6 media only; 5 h | 1 | SC5314 | 84,649,932 | - | 73,942,191 |
| 2 | 80,409,392 | - | 71,897,058 |
| HUVEC media only; 8 h | 1 | SC5314 | 79,236,392 | - | 69,211,058 |
| 2 | 73,186,646 | - | 64,966,022 |
| OKF6 media only; 8 h | 1 | SC5314 | 80,944,466 | - | 68,554,219 |
| 2 | 92,410,618 | - | 82,619,600 |
| HUVEC media only; 1.5 h | 1 | WO-1 | 88,085,572 | - | 70,424,717 |
| 2 | 58,832,380 | - | 53,201,942 |
| OKF6 media only; 1.5 h | 1 | WO-1 | 79,134,384 | - | 66,699,501 |
| 2 | 80,753,032 | - | 72,119,993 |
| HUVEC media only; 5 h | 1 | WO-1 | 90,541,324 | - | 78,180,837 |
| 2 | 76,918,436 | - | 69,266,503 |
| OKF6 media only; 5 h | 1 | WO-1 | 82,848,290 | - | 70,173,024 |
| 2 | 86,780,548 | - | 77,721,165 |
| HUVEC media only; 8 h | 1 | WO-1 | 80,790,242 | - | 67,865,703 |
| 2 | 70,256,612 | - | 62,908,302 |
| OKF6 media only; 8 h | 1 | WO-1 | 74,134,882 | - | 64,867,854 |
| 2 | 65,666,996 | - | 59,358,395 |
