# Supplementary material for: New signaling pathways govern the host response to C. albicans infection in various niches
Source: HighWire-hosted journal article supplement (doi:10.1101/gr.187427.114), 2015-04-09
Supplement: TableS2.docx [file TableS2.docx]

| **Table S2.** List of differentially expressed *C. albicans* genes for strain SC5314 in each *in vitro* experiment as well as the corresponding fold changes in gene expression. | | | | | | |
| --- | --- | --- | --- | --- | --- | --- |
| Values represent log (base 2) fold change of infection divided by time matched control. | | | | | |  |
| A "-" indicates that the fold change did not meet the following criteria: minimum fold change of 2; maximum p-value of 0.05. | | | | | | |
|  | **Infection of HUVEC cells** | | | **Infection with OKF6/TERT-2 cells** | | |
| **#ID** | **1.5 h** | **5 h** | **8 h** | **1.5 h** | **5 h** | **8 h** |
| **orf19.1009** | 3.70051 | 4.39132 | 4.95746 | 6.13072 | 5.19802 | - |
| **orf19.149** | 3.81728 | 3.75578 | 3.43297 | 5.34217 | 2.82886 | - |
| **orf19.1105.3** | 3.81353 | 4.96955 | 4.21441 | 4.8411 | 4.11984 | - |
| **ntar_521** | 1.30919 | - | 1.61477 | 1.54424 | 1.55429 | 1.34724 |
| **orf19.7417** | -3.23231 | -5.74349 | - | -2.89358 | -3.06563 | -2.30751 |
| **orf19.3940.1** | 3.85061 | 2.98957 | - | 4.73279 | 2.86961 | - |
| **ntar_501** | - | 4.43696 | 3.90597 | 4.56736 | 3.41313 | - |
| **orf19.3760** | - | 3.73815 | 3.22499 | 3.65382 | 2.82384 | - |
| **ntar_449** | - | 7.38768 | 6.48297 | 3.38122 | 5.26555 | - |
| **ntar_5** | 1.32914 | 1.56151 | 1.63387 | 1.16407 | - | - |
| **orf19.3338** | 1.27875 | 1.58431 | - | - | 1.62075 | - |
| **orf19.6999** | - | 4.95583 | 4.12014 | - | 4.53017 | - |
| **orf19.7094** | -1.60747 | - | -2.08038 | - | - | -1.59309 |
| **orf19.942** | - | - | 5.72079 | 3.50107 | 3.26755 | - |
| **orf19.7336** | - | 4.24704 | 4.10487 | 3.1773 | - | - |
| **NOVEL-Ca21chr6-023** | - | 4.24722 | 3.59358 | 2.93782 | - | - |
| **ntar_939** | 3.44779 | - | 3.1575 | 2.73889 | - | - |
| **orf19.5716** | -2.21537 | - | 4.42416 | -3.12493 | - | - |
| **orf19.5542** | -1.54239 | - | 2.36864 | -3.62688 | - | - |
| **orf19.3120** | - | - | - | - | -4.60311 | -4.39006 |
| **orf19.1587** | - | - | -1.87925 | - | -2.1987 | - |
| **orf19.4773** | - | - | - | - | 1.55662 | 1.52532 |
| **orf19.3337** | - | 1.66594 | - | - | 1.89722 | - |
| **orf19.4211** | - | - | - | - | 2.69093 | 2.79895 |
| **orf19.5307** | - | - | - | - | 3.87642 | 1.2869 |
| **orf19.6595** | - | -2.51479 | -2.06043 | - | - | - |
| **ntar_282** | - | 5.18647 | 3.65946 | - | - | - |
| **ntar_310** | - | 5.31118 | 5.88524 | - | - | - |
| **orf19.6139** | - | -2.0778 | -1.39451 | - | - | - |
| **orf19.3208** | - | 3.44372 | 3.35698 | - | - | - |
| **orf19.6140** | - | -2.18779 | -1.49046 | - | - | - |
| **CaalfMp05** | - | - | - | 4.74615 | -5.09691 | - |
| **rdn25** | - | - | - | 3.90549 | - | 1.76017 |
| **orf19.2941** | - | 3.21312 | - | 2.65096 | - | - |
| **ntar_697** | - | - | 1.98744 | 1.77243 | - | - |
| **orf19.7266** | 1.71713 | - | - | 1.523 | - | - |
| **orf19.284** | - | - | - | 1.35593 | - | 1.55726 |
| **orf19.3077** | - | - | - | 1.1469 | - | 1.32568 |
| **orf19.2119** | - | - | - | 1.06064 | 1.65545 | - |
| **orf19.5025** | - | - | - | -1.03942 | -1.59269 | - |
| **CaalfMp01** | - | - | - | - | -8.29585 | - |
| **CaalfMp13** | - | - | - | - | -6.60423 | - |
| **CaalfMp08** | - | - | - | - | -6.49393 | - |
| **CaalfMp14** | - | - | - | - | -6.25681 | - |
| **CaalfMp06** | - | - | - | - | -5.84032 | - |
| **CaalfMp11** | - | - | - | - | -5.80996 | - |
| **CaalfMp09** | - | - | - | - | -5.44337 | - |
| **CaalfMp03** | - | - | - | - | -5.18761 | - |
| **snrnau1** | - | - | - | - | -3.94808 | - |
| **orf19.4716** | - | - | - | - | -2.93181 | - |
| **orf19.2738** | - | - | - | - | -1.93781 | - |
| **orf19.3111** | - | - | - | - | -1.9364 | - |
| **orf19.5587** | - | - | - | - | -1.89294 | - |
| **orf19.4887** | - | - | - | - | -1.26208 | - |
| **orf19.7150** | - | - | - | - | 1.46453 | - |
| **orf19.2809** | - | - | - | - | 1.77363 | - |
| **orf19.6688** | - | - | - | - | 2.82981 | - |
| **orf19.5302** | 1.98417 | - | - | - | - | - |
| **orf19.6249** | 2.42653 | - | - | - | - | - |
| **ntar_715** | - | 4.69128 | - | - | - | - |
| **orf19.1996** | - | -1.54854 | - | - | - | - |
| **orf19.3646** | - | -1.86636 | - | - | - | - |
| **orf19.1207** | - | 4.62988 | - | - | - | - |
| **orf19.1874** | - | 3.87737 | - | - | - | - |
| **orf19.7398.1** | - | -6.11386 | - | - | - | - |
| **orf19.4899** | - | 1.79253 | - | - | - | - |
| **orf19.7252** | - | 3.74006 | - | - | - | - |
| **orf19.7397.1** | - | -5.5952 | - | - | - | - |
| **ntar_1043** | - | 3.85237 | - | - | - | - |
| **orf19.7422** | - | - | 1.29588 | - | - | - |
| **orf19.5811** | - | - | 1.43388 | - | - | - |
| **orf19.2762** | - | - | -2.28086 | - | - | - |
| **orf19.2062** | - | - | - | - | - | 1.2651 |
| **orf19.6192** | - | - | - | - | - | 2.18605 |
| **orf19.5728** | - | - | - | - | - | -1.84853 |
| **orf19.1923** | - | - | - | - | - | 1.12914 |
| **orf19.1721** | - | - | - | - | - | -1.15204 |
| **orf19.7263** | - | - | - | - | - | 1.14624 |
| **orf19.7261** | - | - | - | - | - | 1.12318 |
| **orf19.1353** | - | - | - | - | - | 1.8849 |
| **NOVEL-Ca21chr5-021** | - | - | - | - | - | -1.48554 |
| **orf19.4975** | - | - | - | - | - | 1.35391 |
| **orf19.5469** | - | - | - | - | - | 1.3607 |
| **rdn18** | - | - | - | 3.66982 | - | - |
| **orf19.2160** | - | - | - | 3.52238 | - | - |
| **orf19.2449** | - | - | - | 2.90356 | - | - |
| **ntar_1258** | - | - | - | 2.84956 | - | - |
| **orf19.2107.1** | - | - | - | 2.06941 | - | - |
| **orf19.2691** | - | - | - | 1.55924 | - | - |
| **orf19.5474** | - | - | - | 1.53858 | - | - |
| **orf19.5674** | - | - | - | 1.47089 | - | - |
| **orf19.5339** | - | - | - | 1.43331 | - | - |
| **orf19.1097** | - | - | - | 1.38468 | - | - |
| **ntar_1050** | - | - | - | 1.33371 | - | - |
| **orf19.6514** | - | - | - | 1.32524 | - | - |
| **orf19.292** | - | - | - | 1.26838 | - | - |
| **orf19.7436** | - | - | - | 1.2585 | - | - |
| **orf19.4056** | - | - | - | 1.19741 | - | - |
| **orf19.1490** | - | - | - | 1.19669 | - | - |
| **orf19.4555** | - | - | - | 1.19537 | - | - |
| **orf19.6322** | - | - | - | 1.18859 | - | - |
| **orf19.732** | - | - | - | 1.17813 | - | - |
| **orf19.1189** | - | - | - | 1.17708 | - | - |
| **orf19.4941** | - | - | - | 1.16255 | - | - |
| **orf19.6177** | - | - | - | 1.16004 | - | - |
| **orf19.3969** | - | - | - | 1.13449 | - | - |
| **orf19.7127.1** | - | - | - | 1.12174 | - | - |
| **orf19.1750** | - | - | - | 1.10616 | - | - |
| **orf19.7276.1** | - | - | - | 1.10345 | - | - |
| **orf19.5635** | - | - | - | 1.06344 | - | - |
| **orf19.5684** | - | - | - | 1.04597 | - | - |
| **orf19.6146** | - | - | - | 1.0368 | - | - |
| **orf19.2685** | - | - | - | 1.0287 | - | - |
| **orf19.6668** | - | - | - | 1.02745 | - | - |
| **orf19.3669** | - | - | - | 1.02121 | - | - |
| **orf19.7680** | - | - | - | 1.01559 | - | - |
| **orf19.6114** | - | - | - | 1.01093 | - | - |
| **orf19.3707** | - | - | - | -1.08691 | - | - |
| **orf19.7305** | - | - | - | -1.21506 | - | - |
| **orf19.2959.1** | - | - | - | -1.56789 | - | - |
| **orf19.36.1** | - | - | - | -2.15116 | - | - |
| **orf19.2552** | - | - | - | -1.79769e+308 | - | - |
| **ntar_846** | - | - | - | -1.79769e+308 | - | - |
| **ntar_873** | - | - | - | -1.79769e+308 | - | - |
| **orf19.2959** | - | - | - | -1.79769e+308 | - | - |
| **orf19.3852** | - | - | - | - | - | 1.79769e+308 |
| **orf19.3117** | - | - | - | - | -1.79769e+308 | - |
