# Supplementary material for: New signaling pathways govern the host response to C. albicans infection in various niches
Source: HighWire-hosted journal article supplement (doi:10.1101/gr.187427.114), 2015-04-09
Supplement: TableS3.docx [file TableS3.docx]

| **Table S3.** List of differentially expressed *C. albicans* genes for strain WO-1 in each *in vitro* experiment as well as the corresponding fold changes in gene expression. | | | | | | |
| --- | --- | --- | --- | --- | --- | --- |
| Values represent log (base 2) fold change of infection divided by time matched control. | | | | | |  |
| A "-" indicates that the fold change did not meet the following criteria: minimum fold change of 2; maximum p-value of 0.05. | | | | | | |
|  |  |  |  |  |  |  |
|  | **Infection of HUVEC cells** | | | **Infection with OKF6/TERT-2 cells** | | |
| **#ID** | **1.5 h** | **5 h** | **8 h** | **1.5 h** | **5 h** | **8 h** |
| **CAWG_03130** | 1.70531 | 1.95275 | 1.7177 | - | -3.42913 | -4.7696 |
| **CAWG_03101** | - | -3.11226 | -1.83414 | -3.08122 | -2.61446 | - |
| **CAWG_05098** | -2.50108 | - | - | -2.92693 | -5.55968 | - |
| **CAWG_02929** | -1.79536 | - | - | -3.79125 | -6.35206 | - |
| **CAWG_02271** | -1.36094 | - | - | 1.1525 | -1.62658 | - |
| **CAWG_00106** | -1.402 | - | - | -2.15133 | -5.60214 | - |
| **CAWG_05400** | -1.0544 | - | - | - | 1.34817 | 1.08741 |
| **CAWG_05157** | 2.43896 | - | - | - | -1.83925 | 1.7826 |
| **CAWG_00514** | - | - | 1.97036 | - | 4.20712 | 1.0709 |
| **CAWG_03772** | - | - | - | -2.15782 | -2.74485 | -1.62432 |
| **CAWG_03138** | - | - | - | -1.36843 | -3.34561 | -4.74637 |
| **CAWG_04707** | - | - | - | -1.50567 | -1.87744 | -2.21551 |
| **CAWG_03773** | - | - | - | -1.13492 | -1.93544 | -1.1646 |
| **CAWG_00041** | - | - | - | -1.1696 | -1.59425 | -1.14197 |
| **CAWG_05916** | - | - | - | 5.56455 | 2.05779 | 4.35145 |
| **CAWG_03137** | - | - | - | -10.3599 | -15.0728 | -5.90293 |
| **CAWG_03771** | - | - | - | -1.56604 | -2.3265 | -1.83184 |
| **CAWG_03250** | - | - | - | -2.58905 | -1.44706 | -2.48097 |
| **CAWG_00511** | - | - | - | 1.53649 | 1.52949 | 1.32231 |
| **CAWG_00140** | 2.33254 | 3.99773 | - | - | - | - |
| **CAWG_03397** | 1.93977 | - | - | 1.4159 | - | - |
| **CAWG_05020** | -1.8511 | - | - | -2.50902 | - | - |
| **CAWG_02160** | 2.2517 | - | - | 1.43718 | - | - |
| **CAWG_05999** | -1.00767 | - | - | -1.48425 | - | - |
| **CAWG_00504** | 1.65218 | - | - | 1.03597 | - | - |
| **CAWG_02990** | - | 1.74105 | - | -1.2319 | - | - |
| **CAWG_03375** | - | - | 1.47266 | -1.07522 | - | - |
| **CAWG_05385** | 1.1116 | - | - | - | -2.26103 | - |
| **CAWG_01206** | - | - | -2.27838 | - | -2.35744 | - |
| **CAWG_04642** | - | - | -1.9635 | - | -4.85268 | - |
| **CAWG_04816** | - | - | -1.40111 | - | -2.89604 | - |
| **CAWG_02817** | - | - | -2.13754 | - | -3.46488 | - |
| **CAWG_00304** | - | - | - | 2.19567 | -1.87066 | - |
| **CAWG_02797** | - | - | - | -2.46597 | -2.66445 | - |
| **CAWG_05366** | - | - | - | -3.17517 | -2.72049 | - |
| **CAWG_03645** | - | - | - | -1.61607 | -2.40171 | - |
| **CAWG_00630** | - | - | - | -1.15505 | -1.91614 | - |
| **CAWG_06078** | - | - | - | -1.17462 | -1.88658 | - |
| **CAWG_03480** | - | - | - | -4.09338 | -2.54338 | - |
| **CAWG_01226** | 1.13919 | - | - | - | - | 1.30613 |
| **CAWG_00065** | 2.00935 | - | - | - | - | 1.33979 |
| **CAWG_01227** | 1.52564 | - | - | - | - | 1.00615 |
| **CAWG_02486** | -2.1225 | - | - | - | - | -2.75663 |
| **CAWG_05433** | - | - | - | -5.61793 | - | -1.67258 |
| **CAWG_05310** | - | - | - | -2.20188 | - | 1.30506 |
| **CAWG_04078** | - | - | - | -3.57643 | - | -1.66917 |
| **CAWG_04386** | - | - | - | -4.32561 | - | -1.50886 |
| **CAWG_00489** | - | - | - | -1.42232 | - | -1.37524 |
| **CAWG_03213** | - | - | - | -1.40582 | - | -1.45788 |
| **CAWG_05943** | - | - | - | -1.00679 | - | -1.59731 |
| **CAWG_01009** | - | - | - | -3.87327 | - | -1.1452 |
| **CAWG_00992** | - | - | - | -1.9229 | - | -3.38387 |
| **CAWG_04202** | - | - | - | -1.09656 | - | -1.31583 |
| **CAWG_03131** | - | - | - | - | -3.36809 | -4.62757 |
| **CAWG_05687** | - | - | - | - | -2.43748 | -1.78939 |
| **CAWG_01693** | - | - | - | - | -1.94921 | -1.11753 |
| **CAWG_00569** | - | - | - | - | -1.81793 | -2.38974 |
| **CAWG_05573** | - | - | - | - | -2.23539 | -1.32587 |
| **CAWG_03865** | - | - | - | - | -1.76293 | -2.63595 |
| **CAWG_01992** | 1.08854 | - | - | - | - | - |
| **CAWG_06060** | 1.57861 | - | - | - | - | - |
| **CAWG_04810** | 2.66392 | - | - | - | - | - |
| **CAWG_00764** | 1.1037 | - | - | - | - | - |
| **CAWG_01420** | -1.16593 | - | - | - | - | - |
| **CAWG_01804** | 1.2891 | - | - | - | - | - |
| **CAWG_04437** | 1.2251 | - | - | - | - | - |
| **CAWG_05767** | -1.48837 | - | - | - | - | - |
| **CAWG_02074** | - | - | 1.66739 | - | - | - |
| **CAWG_02371** | - | - | 1.34104 | - | - | - |
| **CAWG_01882** | - | - | 1.29488 | - | - | - |
| **CAWG_00295** | - | - | - | -1.06773 | - | - |
| **CAWG_02429** | - | - | - | -1.08665 | - | - |
| **CAWG_02650** | - | - | - | -3.62654 | - | - |
| **CAWG_00547** | - | - | - | -1.37776 | - | - |
| **CAWG_01849** | - | - | - | -1.02105 | - | - |
| **CAWG_05276** | - | - | - | 1.06685 | - | - |
| **CAWG_05664** | - | - | - | -1.36087 | - | - |
| **CAWG_05915** | - | - | - | 2.69871 | - | - |
| **CAWG_00234** | - | - | - | -1.15365 | - | - |
| **CAWG_03716** | - | - | - | -1.76932 | - | - |
| **CAWG_03331** | - | - | - | 1.01741 | - | - |
| **CAWG_03526** | - | - | - | -1.11785 | - | - |
| **CAWG_03147** | - | - | - | 1.07407 | - | - |
| **CAWG_01344** | - | - | - | -1.02692 | - | - |
| **CAWG_05329** | - | - | - | 1.52 | - | - |
| **CAWG_01758** | - | - | - | 1.27475 | - | - |
| **CAWG_05022** | - | - | - | -1.19136 | - | - |
| **CAWG_00517** | - | - | - | -1.02772 | - | - |
| **CAWG_05769** | - | - | - | -1.00082 | - | - |
| **CAWG_03394** | - | - | - | 1.30857 | - | - |
| **CAWG_00676** | - | - | - | -2.60354 | - | - |
| **CAWG_03407** | - | - | - | -1.16661 | - | - |
| **CAWG_03245** | - | - | - | -2.18286 | - | - |
| **CAWG_01572** | - | - | - | -1.9894 | - | - |
| **CAWG_00991** | - | - | - | -1.11808 | - | - |
| **CAWG_03881** | - | - | - | 1.28296 | - | - |
| **CAWG_00495** | - | - | - | -1.07144 | - | - |
| **CAWG_00700** | - | - | - | 2.36852 | - | - |
| **CAWG_02801** | - | - | - | -2.42498 | - | - |
| **CAWG_03845** | - | - | - | -2.32374 | - | - |
| **CAWG_04259** | - | - | - | -1.53251 | - | - |
| **CAWG_03600** | - | - | - | -1.42037 | - | - |
| **CAWG_00592** | - | - | - | -1.91798 | - | - |
| **CAWG_05494** | - | - | - | -1.51756 | - | - |
| **CAWG_06021** | - | - | - | 1.2952 | - | - |
| **CAWG_02766** | - | - | - | 1.14735 | - | - |
| **CAWG_01392** | - | - | - | -1.09244 | - | - |
| **CAWG_00397** | - | - | - | -2.07852 | - | - |
| **CAWG_03805** | - | - | - | 1.64159 | - | - |
| **CAWG_04089** | - | - | - | -3.24423 | - | - |
| **CAWG_05066** | - | - | - | - | -1.58663 | - |
| **CAWG_03102** | - | - | - | - | -5.73852 | - |
| **CAWG_02868** | - | - | - | - | -3.72943 | - |
| **CAWG_04859** | - | - | - | - | -3.49629 | - |
| **CAWG_02715** | - | - | - | - | -1.79116 | - |
| **CAWG_01954** | - | - | - | - | -1.50946 | - |
| **CAWG_03505** | - | - | - | - | -1.61729 | - |
| **CAWG_03392** | - | - | - | - | -3.98734 | - |
| **CAWG_04864** | - | - | - | - | -2.08542 | - |
| **CAWG_00944** | - | - | - | - | -3.07383 | - |
| **CAWG_01172** | - | - | - | - | -1.59408 | - |
| **CAWG_04525** | - | - | - | - | -2.92085 | - |
| **CAWG_03902** | - | - | - | - | -1.62196 | - |
| **CAWG_04860** | - | - | - | - | -2.37914 | - |
| **CAWG_04818** | - | - | - | - | -1.44398 | - |
| **CAWG_05351** | - | - | - | - | -5.91005 | - |
| **CAWG_01039** | - | - | - | - | - | -1.44862 |
| **CAWG_01305** | - | - | - | - | - | 1.8417 |
| **CAWG_05942** | - | - | - | - | - | -2.46837 |
| **CAWG_00042** | - | - | - | - | - | -1.17009 |
| **CAWG_01960** | - | - | - | - | - | 1.17092 |
| **CAWG_04699** | - | - | - | - | - | -1.61267 |
| **CAWG_00416** | - | - | - | - | - | -2.08951 |
| **CAWG_00979** | - | - | - | - | - | -2.21903 |
| **CAWG_02646** | - | - | - | - | - | -1.0562 |
| **CAWG_01499** | - | - | - | - | - | 2.50569 |
| **CAWG_02167** | - | - | - | - | - | -1.06322 |
| **CAWG_02995** | - | - | - | - | - | -1.29618 |
| **CAWG_00652** | - | - | - | - | - | 1.10707 |
| **CAWG_06108** | - | - | - | - | - | -1.05071 |
| **CAWG_00634** | - | - | - | - | - | -1.2526 |
| **CAWG_02181** | - | - | - | - | - | 2.40535 |
| **CAWG_00897** | - | - | - | - | - | -1.5807 |
| **CAWG_04270** | - | - | - | - | - | -1.48169 |
| **CAWG_04553** | - | - | - | - | - | -1.28272 |
| **CAWG_01945** | - | - | - | - | - | -1.3437 |
| **CAWG_00220** | - | - | - | - | - | -1.42531 |
| **CAWG_01473** | - | - | - | - | - | -1.75162 |
| **CAWG_00444** | - | - | - | - | - | -1.29825 |
| **CAWG_05265** | - | - | - | - | - | -1.5172 |
| **CAWG_03269** | - | - | - | - | - | -1.25046 |
| **CAWG_00645** | - | - | - | - | - | -1.23166 |
| **CAWG_01783** | - | - | - | - | - | -1.01694 |
| **CAWG_02312** | - | - | - | - | - | -1.07457 |
| **CAWG_05089** | - | - | - | - | - | -1.05306 |
| **CAWG_05444** | - | - | - | - | - | -1.32589 |
| **CAWG_02004** | - | - | - | - | - | 1.22974 |
| **CAWG_05154** | - | - | - | - | - | -1.51737 |
| **CAWG_00651** | - | - | - | - | - | 1.15963 |
| **CAWG_01682** | - | - | - | - | - | -1.41821 |
| **CAWG_01628** | - | - | - | - | - | -1.23021 |
| **CAWG_00714** | - | - | - | - | - | -1.09316 |
| **CAWG_00784** | - | - | - | - | - | -1.09941 |
| **CAWG_03917** | - | - | - | - | - | -2.11092 |
| **CAWG_03679** | - | - | - | - | - | -2.37556 |
| **CAWG_05466** | - | - | - | - | - | -1.28927 |
| **CAWG_03021** | - | - | - | - | - | 2.19024 |
| **CAWG_01457** | - | - | - | - | - | 1.80067 |
| **CAWG_04977** | - | - | - | - | - | -1.28797 |
| **CAWG_04439** | - | - | - | - | - | -1.35313 |
| **CAWG_03188** | - | - | - | - | - | -1.06072 |
| **CAWG_05053** | - | - | - | - | - | -2.2259 |
| **CAWG_03935** | - | - | - | - | - | -1.71572 |
| **CAWG_03339** | - | - | - | - | - | -1.05793 |
| **CAWG_04753** | - | - | - | - | - | 1.02508 |
| **CAWG_05171** | - | - | - | - | - | -1.14431 |
| **CAWG_03702** | - | - | - | - | - | -1.03149 |
| **CAWG_00358** | - | - | - | - | - | -1.82385 |
| **CAWG_05407** | 1.79769e+308 | - | - | - | - | - |
| **CAWG_02945** | - | - | - | -1.79769e+308 | - | - |
| **CAWG_03388** | - | - | - | -1.79769e+308 | - | - |
|  |  |  |  |  |  |  |
