# Supplementary material for: New signaling pathways govern the host response to C. albicans infection in various niches
Source: HighWire-hosted journal article supplement (doi:10.1101/gr.187427.114), 2015-04-09
Supplement: TableS4.docx [file TableS4.docx]

| **Table S4.** List of 11 genes with matching expression in both SC5314 and WO-1. | | | | | | | |  |  |  |  |  |  |  |
| --- | --- | --- | --- | --- | --- | --- | --- | --- | --- | --- | --- | --- | --- | --- |
| Values represent log (base 2) fold change of infection divided by time matched control. | | | | | | | |  |  |  |  |  |  |  |
| A "-" indicates that the fold change did not meet the following criteria: minimum fold change of 2; maximum p-value of 0.05. | | | | | | | | | | | |  |  |  |
|  |  |  |  |  |  |  |  |  |  |  |  |  |  |  |
|  |  |  | **HUVEC, 1.5 hpi** | | **HUVEC, 5 hpi** | | **HUVEC, 8 hpi** | | **OKF6/TERT-2; 1.5 hpi** | | **OKF6/TERT-2; 5 hpi** | | **OKF6/TERT-2; 8 hpi** | |
| **SC5314 designation** | **SC5314 gene name** | **WO-1 designation** | **SC5314** | **WO-1** | **SC5314** | **WO-1** | **SC5314** | **WO-1** | **SC5314** | **WO-1** | **SC5314** | **WO-1** | **SC5314** | **WO-1** |
| orf19.4773 | AOX2 | CAWG_00514 | - | - | - | - | - | 1.97036 | - | - | 1.55662 | 4.20712 | 1.52532 | 1.0709 |
| orf19.7417 | TSA1 | CAWG_02945 | -3.23231 | - | -5.74349 | - | - | - | -2.89358 | -1.79769e+308 | -3.06563 | - | -2.30751 | - |
| orf19.3111 | PRA1 | CAWG_03130 | - | 1.70531 | - | 1.95275 | - | 1.7177 | - | - | -1.9364 | -3.42913 | - | -4.7696 |
| orf19.3117 | CSA2 | CAWG_03137 | - | - | - | - | - | - | - | -10.3599 | -1.79769e+308 | -15.0728 | - | -5.90293 |
| orf19.3120 |  | CAWG_03138 | - | - | - | - | - | - | - | -1.36843 | -4.60311 | -3.34561 | -4.39006 | -4.74637 |
| orf19.5302 | PGA31 | CAWG_03397 | 1.98417 | 1.93977 | - | - | - | - | - | 1.4159 | - | - | - | - |
| orf19.2107.1 | STF2 | CAWG_03805 | - | - | - | - | - | - | 2.06941 | 1.64159 | - | - | - | - |
| orf19.5716 | SAP4 | CAWG_05020 | -2.21537 | -1.8511 | - | - | 4.42416 | - | -3.12493 | -2.50902 | - | - | - | - |
| orf19.5542 | SAP6 | CAWG_05098 | -1.54239 | -2.50108 | - | - | 2.36864 | - | -3.62688 | -2.92693 | - | -5.55968 | - | - |
| orf19.4211 | FET3 | CAWG_05310 | - | - | - | - | - | - | - | -2.20188 | 2.69093 | - | 2.79895 | 1.30506 |
| orf19.1189 |  | CAWG_05329 | - | - | - | - | - | - | 1.17708 | 1.52 | - | - | - | - |
|  |  |  |  |  |  |  |  |  |  |  |  |  |  |  |
