# Supplementary material for: New signaling pathways govern the host response to C. albicans infection in various niches
Source: HighWire-hosted journal article supplement (doi:10.1101/gr.187427.114), 2015-04-09
Supplement: TableS5.docx [file TableS5.docx]

| **Table S5.** Differentially expressed host genes in each *in vitro* experiment as well as the corresponding fold changes in gene expression. | | | | | | | |
| --- | --- | --- | --- | --- | --- | --- | --- |
| Values represent log (base 2) fold change of infection/uninfected control. | | | | |  |  |  |
| A "-" indicates that the fold change did not meet the following criteria: minimum fold change of 2; maximum p-value of 0.05. | | | | | | | |
|  |  |  |  |  |  |  |  |
|  |  | **HUVEC cells** | | | **OKF6/TERT-2** | | |
| **Gene Name** | **Ensembl Gene ID#** | **1.5 h** | **5 h** | **8 h** | **1.5 h** | **5 h** | **8 h** |
| **RP11-349N19.2** | **ENSG00000179101** | - | - | - | -5.4444 | -2.47231 | - |
| **HSP90AB2P** | **ENSG00000205940** | - | - | - | -5.24365 | - | - |
| **RP11-496I2.5** | **ENSG00000277156** | - | - | - | -4.9712 | - | - |
| **PALD1** | **ENSG00000107719** | - | - | - | -4.88569 | - | - |
| **CTC-523E23.3** | **ENSG00000280106** | - | - | - | -4.12747 | - | - |
| **PPIAP13** | **ENSG00000237882** | - | - | - | -4.01403 | - | - |
| **HMGN2P19** | **ENSG00000229367** | - | - | - | -3.96724 | - | - |
| **EDAR** | **ENSG00000135960** | - | - | - | -3.64824 | - | - |
| **RP11-486G15.2** | **ENSG00000271576** | - | - | - | -3.58076 | - | - |
| **CTD-2227E11.1** | **ENSG00000270933** | - | - | - | -3.36699 | - | - |
| **LCE2B** | **ENSG00000159455** | - | - | - | -3.16646 | - | -3.77069 |
| **ZNF792** | **ENSG00000180884** | - | - | - | -3.11347 | - | - |
| **PAPPA** | **ENSG00000182752** | - | - | - | -2.8914 | - | - |
| **RP11-346C20.3** | **ENSG00000271009** | - | - | - | -2.62444 | - | - |
| **AC006273.5** | **ENSG00000267530** | - | - | - | -2.55215 | - | - |
| **SMAD9** | **ENSG00000120693** | - | - | - | -2.53441 | - | - |
| **RP11-111M22.2** | **ENSG00000179240** | - | - | - | -2.52224 | - | - |
| **LCE2D** | **ENSG00000187223** | - | - | - | -2.46376 | -2.7235 | -3.66122 |
| **LCE2A** | **ENSG00000187173** | - | - | - | -2.44217 | -2.47512 | -3.57779 |
| **RP11-392O17.2** | **ENSG00000277007** | - | - | - | -2.35457 | - | - |
| **RP11-242D8.1** | **ENSG00000267002** | - | - | - | -2.26913 | - | - |
| **ZEB2** | **ENSG00000169554** | - | - | - | -2.24856 | - | - |
| **LYPD2** | **ENSG00000197353** | - | - | - | -2.22756 | - | -2.9202 |
| **LCE2C** | **ENSG00000187180** | - | - | - | -2.15202 | - | -2.92968 |
| **CEP83-AS1** | **ENSG00000278916** | - | - | - | -1.98382 | - | -2.98629 |
| **HAS2** | **ENSG00000170961** | - | - | - | -1.9317 | - | - |
| **CDSN** | **ENSG00000204539** | - | - | - | -1.89665 | - | - |
| **IL36A** | **ENSG00000136694** | - | - | - | -1.87574 | -2.27113 | -3.16855 |
| **DKK1** | **ENSG00000107984** | -1.19687 | - | -1.53403 | -1.8104 | - | - |
| **RP11-441O15.3** | **ENSG00000224934** | - | - | - | -1.79788 | - | - |
| **CCNO** | **ENSG00000152669** | - | - | - | -1.79768 | - | - |
| **RP11-572O17.1** | **ENSG00000270195** | - | - | - | -1.7976 | - | -3.28844 |
| **WFDC12** | **ENSG00000168703** | - | - | - | -1.67899 | - | -2.45135 |
| **ARL4C** | **ENSG00000188042** | - | - | - | -1.63317 | -1.4051 | - |
| **RP11-434E6.4** | **ENSG00000277559** | - | - | - | -1.56032 | - | - |
| **RP11-359E3.4** | **ENSG00000272631** | - | - | - | -1.55419 | - | -3.01513 |
| **CH17-264L24.1** | **ENSG00000279278** | - | - | - | -1.53948 | - | - |
| **CRNN** | **ENSG00000143536** | - | - | - | -1.53757 | - | -3.05042 |
| **PM20D2** | **ENSG00000146281** | - | - | - | -1.49387 | - | - |
| **KBTBD6** | **ENSG00000165572** | - | - | - | -1.47127 | - | - |
| **SPRR2G** | **ENSG00000159516** | - | - | - | -1.30254 | -1.45918 | -1.69417 |
| **SPRR3** | **ENSG00000163209** | - | - | - | -1.22609 | - | -1.70068 |
| **RRS1** | **ENSG00000179041** | - | - | - | -1.14134 | - | -2.3913 |
| **CEACAM6** | **ENSG00000086548** | - | - | - | -1.09522 | - | -2.0031 |
| **CEBPD** | **ENSG00000221869** | - | 1.73609 | - | 1.02172 | 1.15972 | - |
| **PHLDA2** | **ENSG00000181649** | - | - | - | 1.0306 | - | - |
| **KLF10** | **ENSG00000155090** | - | 1.43248 | 1.25057 | 1.03916 | - | - |
| **HK2** | **ENSG00000159399** | - | 2.41072 | 3.01768 | 1.09202 | 2.54723 | - |
| **THBD** | **ENSG00000178726** | - | - | - | 1.09954 | - | - |
| **ADRB2** | **ENSG00000169252** | - | - | - | 1.11608 | 1.88833 | - |
| **EFNB2** | **ENSG00000125266** | 1.02077 | -1.43541 | -1.09123 | 1.1186 | - | - |
| **SGK223** | **ENSG00000275342** | - | - | - | 1.12652 | - | - |
| **C1orf74** | **ENSG00000162757** | - | - | - | 1.16396 | 1.81916 | - |
| **IL1A** | **ENSG00000115008** | -2.52046 | - | - | 1.19943 | 1.32147 | - |
| **MISP** | **ENSG00000099812** | - | - | - | 1.22571 | - | - |
| **RP4-591C20.9** | **ENSG00000268858** | - | - | - | 1.22727 | 1.24088 | - |
| **CCDC85B** | **ENSG00000175602** | - | - | - | 1.24136 | - | - |
| **RP11-54H7.4** | **ENSG00000275216** | - | - | - | 1.2469 | 1.57923 | - |
| **TIPARP** | **ENSG00000163659** | 1.71779 | - | - | 1.25094 | - | - |
| **HIVEP2** | **ENSG00000010818** | 1.52632 | 2.70315 | 2.46945 | 1.26407 | 1.16476 | - |
| **ITPRIP** | **ENSG00000148841** | - | - | 1.38478 | 1.2644 | - | - |
| **SNX18** | **ENSG00000178996** | - | - | - | 1.295 | - | - |
| **IL22RA1** | **ENSG00000142677** | - | - | - | 1.34654 | - | - |
| **JUNB** | **ENSG00000171223** | - | 2.65823 | 2.65829 | 1.34819 | - | - |
| **HK2P1** | **ENSG00000228612** | - | 2.39057 | 2.97101 | 1.35018 | 2.54719 | 2.23834 |
| **RP13-415G19.2** | **ENSG00000278954** | - | - | - | 1.35341 | - | - |
| **CEBPA** | **ENSG00000245848** | - | - | - | 1.3539 | - | - |
| **IRS2** | **ENSG00000185950** | 2.04003 | - | - | 1.36023 | 1.8044 | 1.48135 |
| **TNFRSF21** | **ENSG00000146072** | - | - | - | 1.36449 | - | - |
| **ZSWIM6** | **ENSG00000130449** | - | - | - | 1.38019 | 1.11278 | - |
| **PPARD** | **ENSG00000112033** | - | - | - | 1.3874 | 2.10059 | 1.59276 |
| **CEBPB** | **ENSG00000172216** | - | - | 1.64914 | 1.39158 | 1.06518 | - |
| **RP11-774O3.3** | **ENSG00000251615** | - | - | - | 1.40534 | - | - |
| **RP11-757F18.5** | **ENSG00000261488** | - | - | 2.38073 | 1.42246 | 1.85391 | - |
| **JUN** | **ENSG00000177606** | - | 1.49129 | 1.52088 | 1.43176 | 1.39924 | - |
| **RP11-448G15.3** | **ENSG00000261490** | - | - | - | 1.43643 | - | - |
| **TNFSF9** | **ENSG00000125657** | - | - | - | 1.43988 | - | - |
| **RAP2B** | **ENSG00000181467** | - | - | - | 1.45007 | 2.11902 | 1.93185 |
| **RHOB** | **ENSG00000143878** | - | - | - | 1.47749 | - | -1.7086 |
| **NRARP** | **ENSG00000198435** | 1.10556 | - | - | 1.49424 | - | - |
| **SOWAHC** | **ENSG00000198142** | - | - | - | 1.51134 | 1.24307 | - |
| **ARL5B** | **ENSG00000165997** | - | - | - | 1.51381 | 1.79175 | - |
| **ARL14** | **ENSG00000179674** | - | - | - | 1.52909 | - | - |
| **IER3** | **ENSG00000137331** | - | - | - | 1.55101 | 1.25827 | - |
| **TICAM1** | **ENSG00000127666** | - | - | - | 1.55761 | 1.59148 | - |
| **RP5-1056H1.2** | **ENSG00000278192** | - | - | - | 1.55913 | - | - |
| **BMP2** | **ENSG00000125845** | - | - | - | 1.56732 | 1.64723 | - |
| **SOX9** | **ENSG00000125398** | - | - | - | 1.57773 | - | - |
| **FAM43A** | **ENSG00000185112** | - | - | - | 1.58165 | 2.36416 | 2.00201 |
| **AVPI1** | **ENSG00000119986** | - | - | - | 1.58431 | 2.07711 | 2.28688 |
| **CFAP53** | **ENSG00000172361** | - | - | - | 1.59852 | - | - |
| **HBEGF** | **ENSG00000113070** | - | - | - | 1.61368 | - | - |
| **DDIT4** | **ENSG00000168209** | -1.25531 | 3.26054 | 4.17643 | 1.6217 | 2.7302 | 2.76951 |
| **PPP1R15A** | **ENSG00000087074** | - | 1.21488 | 1.72807 | 1.62751 | 2.43824 | 2.62313 |
| **DUSP10** | **ENSG00000143507** | - | - | - | 1.63388 | 2.66326 | 2.51339 |
| **SERTAD1** | **ENSG00000197019** | - | 1.09416 | - | 1.65146 | - | - |
| **AC005336.4** | **ENSG00000267056** | - | - | - | 1.65238 | - | - |
| **RP11-1038A11.1** | **ENSG00000255983** | - | - | - | 1.65826 | - | - |
| **SLC9A2** | **ENSG00000115616** | - | - | - | 1.66055 | - | - |
| **ADORA2BP1** | **ENSG00000236136** | - | - | - | 1.66163 | - | - |
| **MAFF** | **ENSG00000185022** | - | 1.62232 | 2.04635 | 1.66418 | 2.19605 | - |
| **MAB21L3** | **ENSG00000173212** | - | - | - | 1.6796 | - | - |
| **RP11-553L6.5** | **ENSG00000259976** | - | - | - | 1.69062 | - | - |
| **TTLL1** | **ENSG00000100271** | - | - | - | 1.69189 | - | - |
| **IL24** | **ENSG00000162892** | - | - | - | 1.70696 | - | - |
| **LINC01137** | **ENSG00000233621** | - | - | - | 1.70704 | - | - |
| **GDF15** | **ENSG00000130513** | - | - | - | 1.7287 | - | - |
| **DUSP6** | **ENSG00000139318** | - | 1.51515 | 2.33532 | 1.73832 | - | - |
| **RP11-375I20.6** | **ENSG00000260633** | - | - | - | 1.73841 | - | - |
| **ETS2** | **ENSG00000157557** | - | - | - | 1.74104 | 1.81466 | - |
| **AP5B1** | **ENSG00000254470** | - | - | - | 1.74464 | 1.33085 | - |
| **NOXA1** | **ENSG00000188747** | - | - | - | 1.74945 | - | - |
| **RASSF10** | **ENSG00000189431** | - | - | - | 1.75269 | - | - |
| **RP11-21L23.2** | **ENSG00000261578** | - | - | - | 1.75637 | - | - |
| **RP11-399J13.2** | **ENSG00000278952** | - | - | - | 1.77685 | - | - |
| **FAM46A** | **ENSG00000112773** | - | - | - | 1.81995 | 3.35439 | 2.76866 |
| **RP11-86H7.7** | **ENSG00000235565** | - | - | - | 1.82726 | - | 1.94015 |
| **CSPG4** | **ENSG00000173546** | - | - | - | 1.82951 | - | - |
| **RGS2** | **ENSG00000116741** | - | - | - | 1.86768 | - | - |
| **FRZB** | **ENSG00000162998** | - | - | - | 1.8695 | - | - |
| **RP11-284F21.9** | **ENSG00000272068** | - | - | - | 1.87812 | - | - |
| **GOLGA8O** | **ENSG00000206127** | - | - | - | 1.88472 | - | - |
| **RP11-1299A16.3** | **ENSG00000260641** | - | - | - | 1.91059 | - | - |
| **LINC00370** | **ENSG00000223617** | - | - | - | 1.92323 | - | - |
| **GJC2** | **ENSG00000198835** | - | - | - | 1.93123 | - | - |
| **AC098823.3** | **ENSG00000226125** | - | - | - | 1.93551 | - | - |
| **SLC2A12** | **ENSG00000146411** | - | - | - | 1.94014 | - | - |
| **CH507-42P11.8** | **ENSG00000275993** | 2.14268 | 2.77935 | 2.27631 | 1.94864 | 1.61128 | 1.75533 |
| **EPPK1** | **ENSG00000261150** | - | - | - | 1.9528 | - | - |
| **OR2B11** | **ENSG00000177535** | - | - | - | 1.9746 | - | - |
| **RP11-254F7.2** | **ENSG00000260077** | - | - | 1.74308 | 2.01232 | - | - |
| **ARNT2** | **ENSG00000172379** | - | - | - | 2.01884 | - | - |
| **RP11-58O9.2** | **ENSG00000279806** | - | - | - | 2.0317 | - | - |
| **CILP2** | **ENSG00000160161** | - | - | - | 2.06587 | - | - |
| **KLF4** | **ENSG00000136826** | 2.85234 | 3.44519 | 4.06263 | 2.09567 | 2.06673 | - |
| **RP11-274B21.9** | **ENSG00000271344** | - | - | - | 2.09834 | - | - |
| **KCNIP3** | **ENSG00000115041** | - | - | - | 2.09901 | - | - |
| **OR5BA1P** | **ENSG00000255303** | - | - | - | 2.09915 | - | - |
| **GREB1** | **ENSG00000196208** | - | - | - | 2.10123 | - | - |
| **MXRA5** | **ENSG00000101825** | - | - | - | 2.11763 | 1.84869 | - |
| **RP13-631K18.5** | **ENSG00000255400** | - | - | - | 2.1215 | - | - |
| **FFAR2** | **ENSG00000126262** | - | - | - | 2.13057 | - | - |
| **SELPLG** | **ENSG00000110876** | - | - | - | 2.13721 | - | - |
| **RP11-752G15.8** | **ENSG00000259442** | - | - | - | 2.15373 | - | - |
| **SMARCE1P6** | **ENSG00000214465** | - | - | - | 2.15377 | - | - |
| **RP1-193H18.2** | **ENSG00000267194** | - | -2.43169 | -7.0529 | 2.15731 | - | - |
| **RP11-373D23.3** | **ENSG00000270210** | - | - | - | 2.16259 | - | - |
| **YAP1P1** | **ENSG00000220494** | - | - | - | 2.17085 | - | - |
| **CSF2** | **ENSG00000164400** | - | - | 3.97426 | 2.2251 | 3.56439 | 2.09335 |
| **CTA-384D8.35** | **ENSG00000272666** | - | - | - | 2.22572 | - | - |
| **RP11-339B21.8** | **ENSG00000228510** | - | - | - | 2.24173 | - | - |
| **CTGF** | **ENSG00000118523** | - | - | - | 2.24501 | - | - |
| **RP11-883A18.3** | **ENSG00000265728** | - | - | - | 2.24935 | - | - |
| **CELF4** | **ENSG00000101489** | - | - | - | 2.25912 | - | - |
| **ANKK1** | **ENSG00000170209** | - | - | - | 2.26741 | - | - |
| **KCTD11** | **ENSG00000213859** | - | - | - | 2.26856 | 3.92929 | 3.17301 |
| **LLNLR-246C6.1** | **ENSG00000273218** | - | - | - | 2.27416 | - | - |
| **CTC-526N19.1** | **ENSG00000277013** | - | - | - | 2.27638 | - | - |
| **IL36G** | **ENSG00000136688** | - | - | - | 2.28418 | 2.44431 | - |
| **SV2A** | **ENSG00000159164** | - | - | - | 2.29486 | - | - |
| **LINC00184** | **ENSG00000224939** | - | - | - | 2.30471 | - | - |
| **SIK1** | **ENSG00000142178** | - | - | - | 2.31725 | - | - |
| **AP001046.5** | **ENSG00000237989** | - | 3.52719 | 4.15393 | 2.31853 | 1.68187 | 2.12651 |
| **ZBTB7C** | **ENSG00000184828** | - | - | - | 2.35105 | - | - |
| **GDNF** | **ENSG00000168621** | - | - | - | 2.37141 | 4.11837 | 4.36849 |
| **DYNLL1P1** | **ENSG00000205579** | - | - | - | 2.37269 | - | - |
| **CCER2** | **ENSG00000262484** | - | - | - | 2.37417 | - | - |
| **MRVI1** | **ENSG00000072952** | - | - | - | 2.39189 | - | - |
| **PLAUR** | **ENSG00000011422** | - | - | - | 2.41803 | 2.90684 | - |
| **EGR1** | **ENSG00000120738** | - | - | - | 2.42023 | - | - |
| **IL3RA** | **ENSG00000185291** | - | - | - | 2.4369 | - | - |
| **MPP2** | **ENSG00000108852** | - | - | - | 2.45839 | - | - |
| **C10orf10** | **ENSG00000165507** | -1.5956 | - | - | 2.46204 | 3.79091 | 4.11831 |
| **DUSP5** | **ENSG00000138166** | - | - | 1.37028 | 2.49377 | 2.15339 | 1.65749 |
| **TNFSF14** | **ENSG00000125735** | - | - | - | 2.49854 | - | - |
| **PYHIN1** | **ENSG00000163564** | - | - | - | 2.50265 | - | - |
| **RP11-1334A24.5** | **ENSG00000279821** | - | - | 1.84925 | 2.5053 | - | - |
| **PPP1R3B** | **ENSG00000173281** | - | - | - | 2.54212 | 2.89084 | 2.71224 |
| **RP13-122B23.8** | **ENSG00000260996** | - | - | - | 2.55883 | - | - |
| **SLC47A2** | **ENSG00000180638** | - | - | - | 2.58467 | - | - |
| **JPH2** | **ENSG00000149596** | - | - | - | 2.59767 | - | - |
| **B4GALNT2** | **ENSG00000167080** | - | - | - | 2.60243 | - | - |
| **FAM65C** | **ENSG00000042062** | - | - | - | 2.60569 | - | - |
| **SLC52A1** | **ENSG00000132517** | - | - | - | 2.60982 | - | - |
| **AF064858.10** | **ENSG00000237609** | - | - | - | 2.61467 | - | - |
| **JHDM1D-AS1** | **ENSG00000260231** | - | 1.85154 | - | 2.62493 | 2.95712 | 2.36993 |
| **SEMA7A** | **ENSG00000138623** | - | - | - | 2.6406 | 2.71774 | - |
| **RP13-49I15.6** | **ENSG00000273980** | - | - | - | 2.66059 | - | - |
| **TMEM88** | **ENSG00000167874** | - | - | - | 2.66881 | - | - |
| **VAV3** | **ENSG00000134215** | - | - | - | 2.66899 | - | - |
| **RP11-417N10.3** | **ENSG00000262140** | - | - | - | 2.67068 | - | - |
| **FAM71F1** | **ENSG00000135248** | - | - | - | 2.67938 | - | - |
| **CHODL** | **ENSG00000154645** | - | - | - | 2.70109 | - | - |
| **GPR156** | **ENSG00000175697** | - | - | - | 2.74303 | - | - |
| **RP11-417L19.2** | **ENSG00000256955** | - | - | - | 2.79495 | 2.23764 | - |
| **EDN1** | **ENSG00000078401** | - | - | - | 2.79667 | 2.35575 | - |
| **GEM** | **ENSG00000164949** | - | 2.51683 | 2.57771 | 2.79684 | 3.59275 | - |
| **RP11-396B14.2** | **ENSG00000263033** | - | - | - | 2.80601 | - | - |
| **RTP4** | **ENSG00000136514** | - | - | - | 2.82399 | - | - |
| **CCL20** | **ENSG00000115009** | - | - | - | 2.83795 | 2.68389 | - |
| **CTD-2235C13.3** | **ENSG00000271815** | - | - | - | 2.84549 | - | - |
| **LUCAT1** | **ENSG00000248323** | - | - | - | 2.85315 | - | - |
| **ZNF750** | **ENSG00000141579** | - | - | - | 2.85814 | - | - |
| **RPS2P1** | **ENSG00000225246** | - | - | - | 2.88598 | - | - |
| **ATF3** | **ENSG00000162772** | - | - | - | 2.88667 | - | - |
| **LINC00086** | **ENSG00000178947** | - | - | - | 2.9142 | - | - |
| **RP11-38O14.5** | **ENSG00000234761** | - | - | - | 2.95535 | - | - |
| **RCAN1** | **ENSG00000159200** | - | 1.31097 | 1.41395 | 2.98777 | 1.79817 | - |
| **RP11-20G13.5** | **ENSG00000274294** | - | - | - | 3.00275 | - | - |
| **CSRNP1** | **ENSG00000144655** | - | 1.73783 | 1.84112 | 3.02408 | 1.66178 | - |
| **AF064858.8** | **ENSG00000235888** | - | - | - | 3.06002 | - | - |
| **WNT8B** | **ENSG00000075290** | - | - | - | 3.06282 | - | - |
| **CX3CL1** | **ENSG00000006210** | - | - | 1.94607 | 3.06683 | - | - |
| **RP11-18B16.2** | **ENSG00000227482** | - | - | - | 3.06759 | - | - |
| **XXbac-B444P24.10** | **ENSG00000161132** | - | - | - | 3.07333 | - | - |
| **ST3GAL5-AS1** | **ENSG00000232504** | - | - | - | 3.09964 | - | - |
| **ERRFI1** | **ENSG00000116285** | - | - | - | 3.1136 | 3.22667 | - |
| **RN7SKP172** | **ENSG00000223273** | - | - | - | 3.12321 | - | - |
| **STC1** | **ENSG00000159167** | - | 3.90492 | 6.55467 | 3.13449 | 4.62039 | 4.68986 |
| **DGCR9** | **ENSG00000273032** | - | - | - | 3.14557 | - | - |
| **FCN3** | **ENSG00000142748** | - | - | - | 3.15792 | - | - |
| **PTGS2** | **ENSG00000073756** | - | - | - | 3.17694 | - | - |
| **SOCS3** | **ENSG00000184557** | 1.04628 | 1.48503 | 1.50769 | 3.18182 | 2.21905 | 2.21968 |
| **DUSP1** | **ENSG00000120129** | - | 1.67619 | 1.86698 | 3.18683 | 3.47245 | 1.85631 |
| **RCBTB2P1** | **ENSG00000235150** | - | - | - | 3.19427 | - | - |
| **RP11-513G11.2** | **ENSG00000228271** | - | - | - | 3.20052 | - | - |
| **EVPLL** | **ENSG00000214860** | - | - | - | 3.29495 | - | - |
| **GS1-124K5.9** | **ENSG00000179342** | - | - | - | 3.34299 | - | - |
| **RP11-264J4.10** | **ENSG00000279065** | - | - | - | 3.3808 | - | - |
| **AC108448.2** | **ENSG00000236710** | - | - | - | 3.40075 | - | - |
| **LMOD1** | **ENSG00000163431** | - | - | - | 3.40427 | - | - |
| **NEDD9** | **ENSG00000111859** | - | - | - | 3.43525 | - | - |
| **AC012074.2** | **ENSG00000235072** | - | - | - | 3.45047 | - | - |
| **RP1-102K2.9** | **ENSG00000279699** | - | - | - | 3.53216 | - | - |
| **POU3F1** | **ENSG00000185668** | - | - | - | 3.55145 | - | - |
| **OVOL1** | **ENSG00000172818** | - | - | - | 3.62419 | 2.61062 | - |
| **SERPINA6** | **ENSG00000170099** | - | - | - | 3.6732 | - | - |
| **AF064858.11** | **ENSG00000237721** | - | - | - | 3.70544 | - | - |
| **PIGR** | **ENSG00000162896** | - | - | - | 3.97897 | - | - |
| **KRTAP4-12** | **ENSG00000213416** | - | - | - | 3.98241 | - | - |
| **DRD2** | **ENSG00000149295** | - | - | - | 3.99314 | - | - |
| **SLC6A13** | **ENSG00000010379** | - | - | - | 4.01206 | - | - |
| **KIAA1683** | **ENSG00000130518** | - | - | - | 4.07014 | - | - |
| **KRTAP2-3** | **ENSG00000212724** | - | - | - | 4.07999 | 3.15839 | - |
| **LINC00162** | **ENSG00000275874** | - | - | - | 4.15152 | - | - |
| **ACTBP13** | **ENSG00000234667** | - | - | - | 4.21192 | - | - |
| **IL20** | **ENSG00000162891** | - | - | - | 4.25361 | - | - |
| **RP11-7F17.1** | **ENSG00000243225** | - | 2.84378 | 2.69146 | 4.31585 | - | - |
| **CRB1** | **ENSG00000134376** | - | - | - | 4.47698 | - | - |
| **RP11-7F17.7** | **ENSG00000258602** | - | 2.38232 | - | 4.54176 | - | - |
| **IL17C** | **ENSG00000124391** | - | - | - | 4.57373 | - | - |
| **LINC00659** | **ENSG00000228705** | - | - | - | 4.59218 | - | - |
| **LIF** | **ENSG00000128342** | - | 4.24306 | 5.89645 | 4.64197 | - | - |
| **PDZRN3** | **ENSG00000121440** | - | - | - | 4.68587 | - | - |
| **CLIC5** | **ENSG00000112782** | - | - | - | 4.73659 | - | - |
| **EDN2** | **ENSG00000127129** | - | - | - | 4.75261 | 5.1098 | - |
| **CTD-3247F14.2** | **ENSG00000261026** | - | - | - | 4.81337 | - | - |
| **EGR2** | **ENSG00000122877** | - | - | - | 4.96306 | - | - |
| **C11orf96** | **ENSG00000187479** | - | - | 3.04237 | 5.55122 | 6.53042 | 5.78217 |
| **NR4A3** | **ENSG00000119508** | 3.62434 | 4.55676 | - | 5.56069 | - | - |
| **CH25H** | **ENSG00000138135** | - | - | - | 6.14749 | 3.49972 | - |
| **EGR4** | **ENSG00000135625** | - | - | - | 7.0412 | - | - |
| **NR4A1** | **ENSG00000123358** | - | - | - | 7.4863 | - | - |
| **C1QC** | **ENSG00000159189** | -3.29691 | -8.76158 | -8.84696 | - | - | - |
| **HLA-DRA** | **ENSG00000204287** | -2.09926 | -1.79769e+308 | -7.02885 | - | - | - |
| **MMP12** | **ENSG00000262406** | -5.49093 | -1.79769e+308 | -6.46533 | - | - | - |
| **MYCN** | **ENSG00000134323** | - | -3.77485 | -5.33716 | - | - | - |
| **ZNF826P** | **ENSG00000231205** | - | - | -5.30801 | - | - | - |
| **AIF1** | **ENSG00000204472** | -3.49342 | - | -5.15727 | - | - | - |
| **C1QA** | **ENSG00000173372** | - | -6.15923 | -4.96187 | - | - | - |
| **S100B** | **ENSG00000160307** | -4.49954 | -3.03732 | -4.82246 | - | - | - |
| **MRC1** | **ENSG00000260314** | -2.76619 | -4.80923 | -4.78647 | - | - | - |
| **HLA-DRB1** | **ENSG00000196126** | - | - | -4.6676 | - | - | - |
| **RP11-534I8.1** | **ENSG00000232905** | - | - | -4.63478 | - | - | - |
| **CNTN3** | **ENSG00000113805** | - | - | -4.36442 | - | - | - |
| **CERKL** | **ENSG00000188452** | - | - | -4.31666 | - | - | - |
| **CDH15** | **ENSG00000129910** | - | - | -4.22338 | - | - | - |
| **ARMC4** | **ENSG00000169126** | - | - | -3.90151 | - | - | - |
| **RPS4XP2** | **ENSG00000226948** | - | - | -3.81578 | - | - | - |
| **RFTN2** | **ENSG00000162944** | - | - | -3.65545 | - | - | - |
| **CYSLTR2** | **ENSG00000152207** | - | -3.34198 | -3.53528 | - | - | - |
| **RP11-553A10.1** | **ENSG00000206532** | - | - | -3.46988 | - | - | - |
| **C1orf110** | **ENSG00000185860** | - | -2.84153 | -3.46797 | - | - | - |
| **RP11-351D16.3** | **ENSG00000273008** | - | - | -3.43031 | - | - | - |
| **MEOX2** | **ENSG00000106511** | - | -2.29522 | -3.36221 | - | - | - |
| **RP11-456K23.1** | **ENSG00000267414** | - | - | -3.34814 | - | - | - |
| **PLCXD3** | **ENSG00000182836** | - | - | -3.32257 | - | - | - |
| **XRCC6P1** | **ENSG00000237417** | - | - | -3.04572 | - | - | - |
| **RP11-855A2.5** | **ENSG00000266176** | - | - | -2.97373 | - | - | - |
| **TXNIP** | **ENSG00000265972** | -2.84844 | - | -2.91756 | - | - | - |
| **RP11-367G18.2** | **ENSG00000218208** | - | - | -2.78802 | - | - | - |
| **IL1RAPL1** | **ENSG00000169306** | - | - | -2.68969 | - | - | - |
| **CPA3** | **ENSG00000163751** | - | - | -2.66388 | - | - | - |
| **RN7SK** | **ENSG00000202198** | - | -2.36967 | -2.60756 | - | - | 2.20842 |
| **ELMOD1** | **ENSG00000110675** | - | - | -2.58165 | - | - | - |
| **DACH1** | **ENSG00000276644** | - | - | -2.54457 | - | - | - |
| **KLRG1** | **ENSG00000139187** | - | - | -2.53431 | - | - | - |
| **GPRIN3** | **ENSG00000185477** | - | - | -2.39585 | - | - | - |
| **BMP4** | **ENSG00000125378** | - | -1.69173 | -2.33905 | - | - | - |
| **DNAJB4** | **ENSG00000162616** | - | - | -2.2969 | - | - | - |
| **CD14** | **ENSG00000170458** | - | - | -2.29659 | - | - | - |
| **CLEC4GP1** | **ENSG00000268297** | - | - | -2.29362 | - | - | - |
| **ID2** | **ENSG00000115738** | 2.99257 | - | -2.26943 | - | - | - |
| **GIMAP7** | **ENSG00000179144** | - | -1.68767 | -2.205 | - | - | - |
| **RP11-757G1.6** | **ENSG00000250508** | - | - | -2.18239 | - | - | - |
| **AC010084.1** | **ENSG00000229308** | - | - | -2.17462 | - | - | - |
| **DCAF12L1** | **ENSG00000198889** | - | -1.38225 | -2.1047 | - | - | - |
| **CLEC2B** | **ENSG00000110852** | - | - | -2.06432 | - | - | - |
| **PGBD4** | **ENSG00000182405** | - | - | -2.00587 | - | - | - |
| **NAP1L3** | **ENSG00000186310** | - | - | -1.97728 | - | - | - |
| **TNFSF18** | **ENSG00000120337** | -2.53548 | - | -1.91899 | - | - | - |
| **HTR1B** | **ENSG00000135312** | - | - | -1.8924 | - | - | - |
| **RGS4** | **ENSG00000117152** | - | - | -1.86782 | - | - | - |
| **RP11-624L12.1** | **ENSG00000213432** | - | -1.8752 | -1.82882 | - | - | - |
| **HSPA1A** | **ENSG00000204389** | -1.16666 | -1.34291 | -1.78179 | - | - | 2.50018 |
| **CD34** | **ENSG00000174059** | -1.13086 | -1.65085 | -1.77906 | - | - | - |
| **CITED2** | **ENSG00000164442** | - | -1.46139 | -1.7774 | - | 1.75977 | - |
| **HSPA8P5** | **ENSG00000256356** | - | - | -1.74681 | - | - | - |
| **HNRNPA3P12** | **ENSG00000219102** | - | -1.81997 | -1.69473 | - | - | - |
| **HSPA5** | **ENSG00000044574** | - | - | -1.66336 | - | - | - |
| **FUCA1** | **ENSG00000179163** | -1.00595 | -1.39696 | -1.653 | - | - | - |
| **HSPA1B** | **ENSG00000204388** | - | -1.27693 | -1.63978 | - | - | 2.40306 |
| **SDF2L1** | **ENSG00000128228** | -1.29003 | - | -1.62728 | - | - | - |
| **MANF** | **ENSG00000145050** | - | - | -1.60098 | - | - | - |
| **AR** | **ENSG00000169083** | - | - | -1.55843 | - | - | - |
| **FAT4** | **ENSG00000196159** | - | - | -1.54503 | - | - | - |
| **GIMAP4** | **ENSG00000133574** | - | - | -1.42421 | - | - | - |
| **GIMAP8** | **ENSG00000171115** | - | -1.5443 | -1.40672 | - | - | - |
| **DNAJC3** | **ENSG00000102580** | - | - | -1.39291 | - | - | - |
| **AC004057.1** | **ENSG00000196656** | -1.02022 | -1.33948 | -1.39125 | - | - | - |
| **ANKRD1** | **ENSG00000148677** | - | - | -1.29526 | - | - | - |
| **FAM26E** | **ENSG00000178033** | - | - | -1.29093 | - | - | - |
| **HSPA8P7** | **ENSG00000224773** | - | - | -1.27789 | - | - | -1.60327 |
| **CLEC14A** | **ENSG00000176435** | - | - | -1.26695 | - | - | - |
| **MAGEH1** | **ENSG00000187601** | - | -1.08213 | -1.24881 | - | - | -2.3519 |
| **PCNA** | **ENSG00000132646** | - | - | -1.2393 | - | - | - |
| **HSPH1** | **ENSG00000120694** | - | - | -1.22061 | - | - | - |
| **SDPR** | **ENSG00000168497** | - | - | -1.177 | - | - | - |
| **TACSTD2** | **ENSG00000184292** | - | -1.20387 | -1.16763 | - | 1.37593 | - |
| **HEXIM1** | **ENSG00000186834** | - | -1.29652 | -1.14482 | - | - | - |
| **CKS2** | **ENSG00000123975** | - | - | -1.08574 | - | - | - |
| **KCTD12** | **ENSG00000178695** | - | - | -1.07208 | - | - | - |
| **SOX4** | **ENSG00000124766** | - | - | 1.03672 | - | 2.04829 | 1.71997 |
| **AXL** | **ENSG00000167601** | - | - | 1.04047 | - | - | - |
| **LDHAP4** | **ENSG00000214110** | - | - | 1.05709 | - | 1.21235 | - |
| **CDR2L** | **ENSG00000109089** | - | - | 1.09933 | - | - | - |
| **EFHD2** | **ENSG00000142634** | - | - | 1.10552 | - | - | - |
| **PPP1R18** | **ENSG00000146112** | - | - | 1.10935 | - | - | - |
| **SDC4** | **ENSG00000124145** | - | - | 1.12414 | - | 1.09571 | - |
| **RP11-395B7.7** | **ENSG00000260336** | - | - | 1.13988 | - | - | - |
| **SRXN1** | **ENSG00000271303** | - | - | 1.15427 | - | - | - |
| **FOXP4** | **ENSG00000137166** | - | - | 1.16052 | - | - | - |
| **H1F0** | **ENSG00000189060** | - | - | 1.16124 | - | - | - |
| **ITPR3** | **ENSG00000096433** | - | - | 1.1822 | - | - | - |
| **ACKR3** | **ENSG00000144476** | - | - | 1.18234 | - | - | - |
| **H1FX** | **ENSG00000184897** | - | - | 1.1882 | - | - | - |
| **RASSF1** | **ENSG00000068028** | - | - | 1.19634 | - | - | - |
| **AKAP12** | **ENSG00000131016** | -1.26957 | - | 1.20648 | - | - | - |
| **SESN2** | **ENSG00000130766** | - | - | 1.23293 | - | - | - |
| **SOX7** | **ENSG00000171056** | - | 1.55476 | 1.24399 | - | - | - |
| **RNF19B** | **ENSG00000116514** | - | - | 1.26173 | - | - | - |
| **IER5L** | **ENSG00000188483** | - | 1.51461 | 1.28086 | - | - | - |
| **SNAI1** | **ENSG00000124216** | - | 1.1543 | 1.29567 | - | - | - |
| **PIP5K1C** | **ENSG00000186111** | - | - | 1.30886 | - | - | - |
| **ATF4** | **ENSG00000128272** | - | - | 1.36751 | - | 1.22625 | - |
| **MRC2** | **ENSG00000011028** | - | - | 1.37171 | - | - | - |
| **FOSL1** | **ENSG00000175592** | - | 1.40344 | 1.37224 | - | - | - |
| **MID1IP1** | **ENSG00000165175** | - | - | 1.38161 | - | - | - |
| **TOR4A** | **ENSG00000198113** | - | - | 1.38734 | - | - | - |
| **IRF2BPL** | **ENSG00000119669** | - | - | 1.41073 | - | - | - |
| **NFIL3** | **ENSG00000165030** | - | - | 1.42469 | - | 2.61486 | 2.39593 |
| **SOX12** | **ENSG00000177732** | - | - | 1.43349 | - | - | - |
| **FAM89B** | **ENSG00000176973** | - | - | 1.45565 | - | - | - |
| **HES4** | **ENSG00000188290** | - | - | 1.46231 | - | - | - |
| **CDC42EP2** | **ENSG00000149798** | - | 1.21715 | 1.46635 | - | - | - |
| **HSPA12B** | **ENSG00000132622** | - | - | 1.4857 | - | - | - |
| **PCDH1** | **ENSG00000156453** | - | - | 1.50994 | - | - | - |
| **STMN3** | **ENSG00000197457** | - | - | 1.51183 | - | - | - |
| **C15orf39** | **ENSG00000167173** | - | - | 1.52146 | - | - | - |
| **MYADM** | **ENSG00000179820** | - | 1.42618 | 1.52783 | - | - | - |
| **KANK1** | **ENSG00000107104** | - | 1.39579 | 1.53161 | - | - | - |
| **SPSB1** | **ENSG00000171621** | - | - | 1.53188 | - | - | - |
| **PRKCD** | **ENSG00000163932** | - | - | 1.53659 | - | - | - |
| **GPR153** | **ENSG00000158292** | - | - | 1.54497 | - | - | - |
| **EFNA1** | **ENSG00000169242** | - | 1.4446 | 1.55046 | - | 1.9872 | - |
| **SLC7A2** | **ENSG00000003989** | -1.20786 | 1.38385 | 1.55125 | - | - | - |
| **BOK** | **ENSG00000176720** | - | - | 1.59576 | - | - | - |
| **PWWP2B** | **ENSG00000171813** | - | - | 1.65004 | - | - | - |
| **ITPKB** | **ENSG00000143772** | - | - | 1.65673 | - | - | - |
| **PALM** | **ENSG00000099864** | - | - | 1.68191 | - | - | - |
| **LAMC2** | **ENSG00000058085** | - | 1.16193 | 1.68322 | - | - | - |
| **ZFP36** | **ENSG00000128016** | 1.17622 | 2.07094 | 1.74189 | - | 1.52229 | - |
| **ZSWIM4** | **ENSG00000132003** | - | - | 1.75942 | - | - | - |
| **TBC1D2** | **ENSG00000095383** | - | - | 1.79735 | - | - | - |
| **CTD-3252C9.4** | **ENSG00000267519** | 1.97823 | 1.76479 | 1.79802 | - | 1.20564 | - |
| **ARID5A** | **ENSG00000196843** | - | - | 1.81265 | - | - | - |
| **SH3RF3** | **ENSG00000172985** | - | - | 1.83138 | - | - | - |
| **CXCL2** | **ENSG00000081041** | - | 2.33622 | 1.87761 | - | - | - |
| **CHST1** | **ENSG00000175264** | - | - | 1.88095 | - | - | - |
| **KIF26A** | **ENSG00000066735** | - | - | 1.90784 | - | - | - |
| **SMAD7** | **ENSG00000101665** | 2.09562 | 1.80697 | 1.92098 | - | - | - |
| **ATF4P4** | **ENSG00000256167** | - | 1.47078 | 1.98571 | - | - | - |
| **SERPINB2** | **ENSG00000197632** | - | 2.53732 | 2.00819 | - | - | - |
| **UPP1** | **ENSG00000183696** | - | 1.92956 | 2.01504 | - | - | - |
| **VPS37D** | **ENSG00000176428** | - | - | 2.03508 | - | - | - |
| **FOXF1** | **ENSG00000103241** | 1.65863 | - | 2.04875 | - | - | - |
| **C17orf96** | **ENSG00000273604** | - | - | 2.05435 | - | - | - |
| **RARA** | **ENSG00000131759** | - | 1.83169 | 2.09045 | - | - | - |
| **IRAK2** | **ENSG00000134070** | - | 1.67263 | 2.09975 | - | - | - |
| **SMIM3** | **ENSG00000256235** | - | - | 2.10861 | - | 1.5852 | - |
| **PLEKHN1** | **ENSG00000187583** | - | - | 2.11145 | - | - | - |
| **SLCO2A1** | **ENSG00000174640** | - | - | 2.13877 | - | - | - |
| **ICOSLG** | **ENSG00000277117** | - | - | 2.16426 | - | - | - |
| **ZBTB42** | **ENSG00000179627** | - | - | 2.17118 | - | - | - |
| **MEDAG** | **ENSG00000102802** | - | 1.3513 | 2.2016 | - | - | - |
| **NPR1** | **ENSG00000169418** | - | - | 2.22363 | - | - | - |
| **RP11-284F21.10** | **ENSG00000272405** | - | - | 2.22577 | - | - | - |
| **TAF4B** | **ENSG00000141384** | - | - | 2.25485 | - | - | - |
| **RELB** | **ENSG00000104856** | - | - | 2.27856 | - | - | - |
| **F3** | **ENSG00000117525** | - | 2.97993 | 2.31775 | - | - | - |
| **KLF2** | **ENSG00000127528** | - | - | 2.33018 | - | - | - |
| **PIM1** | **ENSG00000137193** | - | 2.66712 | 2.33156 | - | 2.22112 | - |
| **BCL2A1** | **ENSG00000140379** | - | - | 2.33603 | - | - | - |
| **TMEM158** | **ENSG00000249992** | - | - | 2.35679 | - | 1.53623 | - |
| **BNIP3** | **ENSG00000176171** | - | 1.77858 | 2.36607 | - | 2.49224 | 2.50591 |
| **SH3RF3-AS1** | **ENSG00000259863** | - | - | 2.37439 | - | - | - |
| **PTGIS** | **ENSG00000124212** | - | 1.60738 | 2.41046 | - | - | - |
| **ICAM1** | **ENSG00000090339** | - | - | 2.48914 | - | - | - |
| **NFATC2** | **ENSG00000101096** | - | 2.46443 | 2.5198 | - | - | - |
| **DHRS3** | **ENSG00000162496** | - | 1.63644 | 2.52125 | - | - | - |
| **KRT8P10** | **ENSG00000231203** | - | - | 2.52543 | - | - | - |
| **N4BP3** | **ENSG00000145911** | - | - | 2.53048 | - | - | - |
| **CXCL3** | **ENSG00000163734** | - | 2.68562 | 2.55177 | - | - | - |
| **ZNF469** | **ENSG00000225614** | - | - | 2.55616 | - | - | - |
| **PFKFB3** | **ENSG00000170525** | - | - | 2.61825 | - | - | - |
| **VLDLR** | **ENSG00000147852** | - | - | 2.68263 | - | - | - |
| **TRIB3** | **ENSG00000101255** | - | - | 2.6936 | - | - | - |
| **TPPP3** | **ENSG00000159713** | - | - | 2.7162 | - | - | - |
| **GLIS2** | **ENSG00000126603** | - | - | 2.71769 | - | - | - |
| **CHAC1** | **ENSG00000128965** | -2.46877 | - | 2.77741 | - | - | - |
| **SLC7A5** | **ENSG00000103257** | - | - | 2.79478 | - | - | - |
| **SLC2A1** | **ENSG00000117394** | - | 2.08933 | 2.82798 | - | - | - |
| **FAM163A** | **ENSG00000143340** | - | - | 2.83715 | - | - | - |
| **RDH13** | **ENSG00000160439** | - | 2.5925 | 2.90018 | - | - | - |
| **ULBP1** | **ENSG00000111981** | - | - | 2.90932 | - | - | - |
| **RP3-439F8.1** | **ENSG00000234869** | 2.30521 | - | 2.93427 | - | - | - |
| **CYP26B1** | **ENSG00000003137** | - | - | 2.98327 | - | - | - |
| **RP3-452M16.1** | **ENSG00000230956** | - | - | 3.08707 | - | - | - |
| **VEGFA** | **ENSG00000112715** | - | - | 3.17237 | - | - | - |
| **MEOX1** | **ENSG00000005102** | - | - | 3.30158 | - | - | - |
| **F2RL3** | **ENSG00000127533** | - | - | 3.36974 | - | - | - |
| **FOS** | **ENSG00000170345** | 4.16256 | 3.77766 | 3.51496 | - | - | - |
| **KIAA1644** | **ENSG00000138944** | - | 2.49151 | 3.53631 | - | - | - |
| **ADM** | **ENSG00000148926** | - | 2.8677 | 3.57237 | - | 3.7177 | 3.99982 |
| **C3orf36** | **ENSG00000221972** | - | - | 3.66613 | - | - | - |
| **SLC2A3** | **ENSG00000059804** | - | 3.20764 | 3.69916 | - | 5.37907 | - |
| **ADM2** | **ENSG00000128165** | - | - | 3.7587 | - | - | - |
| **IGLON5** | **ENSG00000142549** | - | - | 3.81728 | - | - | -3.18373 |
| **AC005753.1** | **ENSG00000278925** | - | - | 3.91886 | - | - | - |
| **LINC00324** | **ENSG00000178977** | - | - | 3.97011 | - | - | - |
| **PFKFB4** | **ENSG00000114268** | - | 3.06787 | 4.13177 | - | - | - |
| **MIR210HG** | **ENSG00000247095** | - | 4.45999 | 4.3843 | - | 2.94359 | - |
| **NEURL3** | **ENSG00000163121** | - | - | 4.51427 | - | - | - |
| **BHLHE40** | **ENSG00000134107** | - | 4.3041 | 4.64198 | - | - | - |
| **WI2-87327B8.2** | **ENSG00000273812** | - | - | 4.81359 | - | - | - |
| **LRFN5** | **ENSG00000165379** | - | - | 5.17143 | - | - | - |
| **CNGB1** | **ENSG00000070729** | - | - | 5.24892 | - | - | - |
| **PPP1R3G** | **ENSG00000219607** | - | - | 5.37176 | - | - | - |
| **IGDCC4** | **ENSG00000103742** | - | - | 5.65489 | - | - | - |
| **PDE4C** | **ENSG00000105650** | - | - | 5.69376 | - | - | - |
| **PPFIA4** | **ENSG00000143847** | - | 4.96278 | 6.03383 | - | - | - |
| **KRTAP9-4** | **ENSG00000241595** | - | - | - | - | -1.79769e+308 | - |
| **RP11-164C12.1** | **ENSG00000258787** | - | - | - | - | -1.79769e+308 | - |
| **RN7SL472P** | **ENSG00000240457** | - | - | - | - | -1.79769e+308 | - |
| **RP11-131L12.2** | **ENSG00000270482** | - | - | - | - | -1.79769e+308 | - |
| **RP11-188D8.1** | **ENSG00000271427** | - | - | - | - | -1.79769e+308 | - |
| **BTF3P5** | **ENSG00000233594** | - | - | - | - | -1.79769e+308 | - |
| **FAM136BP** | **ENSG00000232654** | - | - | - | - | -1.79769e+308 | - |
| **RP13-314C10.5** | **ENSG00000233785** | - | - | - | - | -1.79769e+308 | - |
| **RP1-199J3.5** | **ENSG00000219755** | - | - | - | - | -1.79769e+308 | - |
| **CTC-428G20.2** | **ENSG00000249791** | - | - | - | - | -1.79769e+308 | - |
| **RP11-458F8.2** | **ENSG00000230295** | - | - | - | - | -1.79769e+308 | - |
| **SNRPGP2** | **ENSG00000264350** | - | - | - | - | -1.79769e+308 | - |
| **RP11-686O6.1** | **ENSG00000272966** | - | - | - | - | -1.79769e+308 | -1.79769e+308 |
| **RP11-320N7.1** | **ENSG00000242444** | - | - | - | - | -1.79769e+308 | -1.79769e+308 |
| **RN7SL793P** | **ENSG00000264554** | - | - | - | - | -1.79769e+308 | -1.79769e+308 |
| **CCDC71L** | **ENSG00000253276** | - | -1.33612 | - | - | - | - |
| **IL6STP1** | **ENSG00000227018** | - | 1.69212 | - | - | - | - |
| **BNIPL** | **ENSG00000163141** | - | -5.99603 | - | - | - | - |
| **FPR3** | **ENSG00000187474** | - | -4.44412 | - | - | - | - |
| **FAM78A** | **ENSG00000126882** | - | -1.50968 | - | - | - | - |
| **CLDN5** | **ENSG00000184113** | - | -2.18916 | - | - | - | - |
| **MIR146A** | **ENSG00000253522** | - | 2.10044 | - | - | - | - |
| **SFTPB** | **ENSG00000168878** | - | -4.29033 | - | - | - | - |
| **PDK4** | **ENSG00000004799** | - | -2.05929 | - | - | - | - |
| **CCL2** | **ENSG00000108691** | - | 1.23335 | - | - | - | - |
| **PRDM6** | **ENSG00000061455** | - | -6.8414 | - | - | - | - |
| **LCP1** | **ENSG00000136167** | - | -3.41237 | - | - | - | - |
| **FOXC2** | **ENSG00000176692** | - | 1.07983 | - | - | - | - |
| **THSD1** | **ENSG00000136114** | - | -1.46693 | - | - | - | - |
| **NUAK2** | **ENSG00000163545** | - | 1.96353 | - | - | - | - |
| **TMEM100** | **ENSG00000166292** | - | -3.70021 | - | - | - | - |
| **PIM3** | **ENSG00000198355** | - | 1.16283 | - | - | - | - |
| **MGAT2** | **ENSG00000168282** | - | - | - | - | - | -1.55429 |
| **CTB-31O20.2** | **ENSG00000261526** | - | - | - | - | - | -2.61495 |
| **RPL17P50** | **ENSG00000213700** | - | - | - | - | - | 2.52216 |
| **GAPDHP44** | **ENSG00000213352** | - | - | - | - | - | 3.21509 |
| **RP11-148B3.1** | **ENSG00000258018** | - | - | - | - | - | -1.79769e+308 |
| **NCCRP1** | **ENSG00000188505** | - | - | - | - | - | -1.88537 |
| **RP11-777J24.1** | **ENSG00000233778** | - | - | - | - | - | 5.04583 |
| **FAM172BP** | **ENSG00000175841** | - | - | - | - | - | -2.25657 |
| **MMGT1** | **ENSG00000169446** | - | - | - | - | - | -1.39904 |
| **DBF4P1** | **ENSG00000235489** | - | - | - | - | - | -1.94063 |
| **PRORSD1P** | **ENSG00000162997** | - | - | - | - | - | -2.65536 |
| **ATP5G2P1** | **ENSG00000225712** | - | - | - | - | - | -1.79769e+308 |
| **RNF224** | **ENSG00000233198** | - | - | - | - | - | -3.46574 |
| **U1** | **ENSG00000277918** | - | - | - | - | - | 6.54407 |
| **RP11-15F12.6** | **ENSG00000280335** | - | - | - | - | - | 3.22653 |
| **RP11-254F7.4** | **ENSG00000272524** | - | - | - | - | - | -1.79769e+308 |
| **CTD-2538C1.3** | **ENSG00000267567** | - | - | - | - | - | -1.79769e+308 |
| **RP11-93H24.3** | **ENSG00000273723** | - | - | - | - | - | -2.95625 |
| **ANXA9** | **ENSG00000143412** | - | - | - | - | - | -2.01498 |
| **HIST1H2BL** | **ENSG00000185130** | - | - | - | - | - | 3.21401 |
| **RIPPLY2** | **ENSG00000203877** | - | - | - | - | - | -1.79769e+308 |
| **RP11-486M23.3** | **ENSG00000280147** | - | - | - | - | - | -2.56593 |
| **MT-ND3** | **ENSG00000198840** | - | - | - | - | - | -1.37045 |
| **MARS2** | **ENSG00000247626** | - | - | - | - | - | -2.42685 |
| **MAFB** | **ENSG00000204103** | - | - | - | - | - | -4.17358 |
| **RP11-77P6.2** | **ENSG00000227896** | - | - | - | - | - | -3.74964 |
| **SLFNL1** | **ENSG00000171790** | - | - | - | - | - | -2.57254 |
| **MT-ND6** | **ENSG00000198695** | - | - | - | - | - | -2.26064 |
| **HIST1H1E** | **ENSG00000168298** | - | - | - | - | - | 3.3997 |
| **RASL11B** | **ENSG00000128045** | - | - | - | - | - | -3.37592 |
| **SLC30A1** | **ENSG00000170385** | - | - | - | - | - | -1.61495 |
| **RP11-2H3.6** | **ENSG00000272885** | - | - | - | - | - | -1.79769e+308 |
| **VSIG10L** | **ENSG00000186806** | - | - | - | - | - | -2.57273 |
| **SLC35D1** | **ENSG00000116704** | - | - | - | - | - | -1.48666 |
| **AC104651.1** | **ENSG00000236307** | - | - | - | - | - | -1.79769e+308 |
| **CSTF2T** | **ENSG00000177613** | - | - | - | - | - | -1.50316 |
| **ADAMTS15** | **ENSG00000166106** | - | - | - | - | - | -2.84658 |
| **MIR17HG** | **ENSG00000215417** | - | - | - | - | - | -3.23181 |
| **RP11-2B6.2** | **ENSG00000269929** | - | - | - | - | - | -3.0179 |
| **CYP4F22** | **ENSG00000171954** | - | - | - | - | - | -3.27272 |
| **RP11-712B9.5** | **ENSG00000270578** | - | - | - | - | - | -1.79769e+308 |
| **LINC01293** | **ENSG00000230836** | - | - | - | - | - | 3.48413 |
| **RP11-465B22.8** | **ENSG00000272141** | - | - | - | - | - | -2.3176 |
| **SPINK7** | **ENSG00000145879** | - | - | - | - | - | -2.79341 |
| **HIST1H1B** | **ENSG00000184357** | - | - | - | - | - | 3.22259 |
| **WNT7A** | **ENSG00000154764** | - | - | - | - | - | -1.40963 |
| **NUFIP1P** | **ENSG00000218890** | - | - | - | - | - | -2.00054 |
| **S100A12** | **ENSG00000163221** | - | - | - | - | - | -1.70557 |
| **RP11-132A1.4** | **ENSG00000232445** | - | - | - | - | - | -2.08548 |
| **RPL37P2** | **ENSG00000239559** | - | - | - | - | - | 3.1555 |
| **RP4-758J18.13** | **ENSG00000272455** | - | - | - | - | - | -2.45522 |
| **LINC01311** | **ENSG00000260924** | - | - | - | - | - | -3.00199 |
| **CALB2** | **ENSG00000172137** | - | - | - | - | - | -2.51406 |
| **HIST1H2BM** | **ENSG00000273703** | - | - | - | - | - | 5.50965 |
| **CTD-3075F15.1** | **ENSG00000273565** | - | - | - | - | - | -1.79769e+308 |
| **HSPA6** | **ENSG00000173110** | - | - | - | - | - | 3.85408 |
| **UFSP1** | **ENSG00000176125** | - | - | - | - | - | -2.50978 |
| **SNHG19** | **ENSG00000260260** | - | - | - | - | - | -2.32865 |
| **TSSK5P** | **ENSG00000227473** | - | - | - | - | - | -1.79769e+308 |
| **AP000695.4** | **ENSG00000233818** | - | - | - | - | - | 5.60102 |
| **RP11-631N16.2** | **ENSG00000257354** | - | - | - | - | - | -2.28936 |
| **S100A7** | **ENSG00000143556** | - | - | - | - | - | -1.69202 |
| **SDR9C7** | **ENSG00000170426** | - | - | - | - | - | -2.09516 |
| **HIST1H2AH** | **ENSG00000274997** | - | - | - | - | - | 4.52193 |
| **HIST1H2BI** | **ENSG00000278588** | - | - | - | - | - | 6.8512 |
| **HIST1H1D** | **ENSG00000124575** | - | - | - | - | - | 3.51173 |
| **NKAIN1** | **ENSG00000084628** | - | - | - | - | 5.64678 | - |
| **ANKRD37** | **ENSG00000186352** | - | - | - | - | 5.18725 | 4.74052 |
| **RP11-61L23.2** | **ENSG00000253882** | - | - | - | - | 4.73013 | - |
| **LINC01068** | **ENSG00000227676** | - | - | - | - | 4.52169 | 5.73192 |
| **SLC2A14** | **ENSG00000173262** | - | - | - | - | 4.05983 | - |
| **HGFAC** | **ENSG00000109758** | - | - | - | - | 4.01389 | - |
| **FAM115C** | **ENSG00000170379** | - | - | - | - | 3.92022 | 3.80773 |
| **RP1-224A6.9** | **ENSG00000271840** | - | - | - | - | 3.82852 | 4.39135 |
| **RP11-803B1.8** | **ENSG00000272690** | - | - | - | - | 3.79246 | - |
| **HILPDA** | **ENSG00000135245** | - | - | - | - | 3.13121 | 3.41799 |
| **MTRNR2L8** | **ENSG00000255823** | - | - | - | - | 2.92512 | 2.57213 |
| **CLDN16** | **ENSG00000113946** | - | - | - | - | 2.85188 | - |
| **RP11-274H2.5** | **ENSG00000261051** | - | - | - | - | 2.8104 | 3.03325 |
| **SERPINA10** | **ENSG00000140093** | - | - | - | - | 2.76677 | - |
| **PNRC1** | **ENSG00000146278** | - | - | - | - | 2.7244 | - |
| **SLAMF9** | **ENSG00000162723** | - | - | - | - | 2.71071 | - |
| **MAF** | **ENSG00000178573** | - | - | - | - | 2.70261 | - |
| **IGFBP3** | **ENSG00000146674** | - | - | - | - | 2.6905 | - |
| **IL13RA2** | **ENSG00000123496** | - | - | - | - | 2.65268 | 2.39271 |
| **MMP10** | **ENSG00000166670** | - | - | - | - | 2.59967 | - |
| **RP11-180C1.1** | **ENSG00000250038** | - | - | - | - | 2.51495 | - |
| **TNFAIP8** | **ENSG00000145779** | - | - | - | - | 2.50868 | - |
| **IPMK** | **ENSG00000151151** | - | - | - | - | 2.47976 | 2.14722 |
| **ASB2** | **ENSG00000100628** | - | - | - | - | 2.46277 | - |
| **HCAR3** | **ENSG00000255398** | - | - | - | - | 2.4412 | - |
| **BTG1** | **ENSG00000133639** | - | - | - | - | 2.43386 | - |
| **IGSF9** | **ENSG00000085552** | - | - | - | - | 2.38138 | - |
| **GK3P** | **ENSG00000249244** | - | - | - | - | 2.31764 | 2.43552 |
| **ICAM5** | **ENSG00000105376** | - | - | - | - | 2.30208 | - |
| **GRPEL2P2** | **ENSG00000225814** | - | - | - | - | 2.2552 | - |
| **CA2** | **ENSG00000104267** | - | - | - | - | 2.25062 | - |
| **BNIP3L** | **ENSG00000104765** | - | - | - | - | 2.12833 | - |
| **EGLN1** | **ENSG00000135766** | - | - | - | - | 2.12619 | - |
| **OCLN** | **ENSG00000197822** | - | - | - | - | 2.12277 | - |
| **KRT75** | **ENSG00000170454** | - | - | - | - | 2.08599 | - |
| **UAP1L1** | **ENSG00000197355** | - | - | - | - | 2.07859 | - |
| **RP11-351I24.1** | **ENSG00000254554** | - | - | - | - | 2.03287 | - |
| **CCNG2** | **ENSG00000138764** | - | - | - | - | 2.01572 | - |
| **INHBA** | **ENSG00000122641** | - | - | - | - | 1.99055 | - |
| **TBC1D3C** | **ENSG00000278299** | - | - | - | - | 1.96484 | - |
| **BNIP3P1** | **ENSG00000197358** | - | - | - | - | 1.95358 | - |
| **GOLGA7B** | **ENSG00000155265** | - | - | - | - | 1.88955 | - |
| **RP11-195E2.1** | **ENSG00000230847** | - | - | - | - | 1.88177 | - |
| **RNF122** | **ENSG00000133874** | - | - | - | - | 1.81331 | - |
| **TPBG** | **ENSG00000146242** | - | - | - | - | 1.73884 | - |
| **SNX9** | **ENSG00000130340** | - | - | - | - | 1.70647 | 1.40663 |
| **PACERR** | **ENSG00000273129** | - | - | - | - | 1.67296 | - |
| **RP11-395I14.2** | **ENSG00000253476** | - | - | - | - | 1.66822 | - |
| **ZC3H12C** | **ENSG00000149289** | - | - | - | - | 1.63825 | - |
| **LINC00973** | **ENSG00000240476** | - | - | - | - | 1.63312 | - |
| **AC083843.1** | **ENSG00000259820** | - | - | - | - | 1.59033 | - |
| **RP11-173M1.8** | **ENSG00000264469** | - | - | - | - | 1.58878 | - |
| **CD55** | **ENSG00000196352** | - | - | - | - | 1.5766 | - |
| **TM4SF1** | **ENSG00000169908** | - | - | - | - | 1.56053 | - |
| **CH17-431G21.1** | **ENSG00000274487** | - | - | - | - | 1.53493 | - |
| **CHST2** | **ENSG00000175040** | - | - | - | - | 1.53279 | 1.56802 |
| **SLC5A3** | **ENSG00000198743** | - | - | - | - | 1.52428 | - |
| **CSGALNACT2** | **ENSG00000169826** | - | - | - | - | 1.52039 | - |
| **C4orf3** | **ENSG00000164096** | - | - | - | - | 1.51927 | - |
| **HECA** | **ENSG00000112406** | - | - | - | - | 1.50783 | - |
| **ZXDB** | **ENSG00000198455** | - | - | - | - | 1.49674 | - |
| **HCAR2** | **ENSG00000182782** | - | - | - | - | 1.46941 | - |
| **CH17-260O16.1** | **ENSG00000261499** | - | - | - | - | 1.46841 | - |
| **PMAIP1** | **ENSG00000141682** | - | - | - | - | 1.40935 | - |
| **RLF** | **ENSG00000117000** | - | 1.05233 | - | - | 1.35831 | - |
| **KLF9** | **ENSG00000119138** | - | - | - | - | 1.35507 | - |
| **ZC3HAV1L** | **ENSG00000146858** | - | - | - | - | 1.3208 | - |
| **ZBTB34** | **ENSG00000177125** | - | - | - | - | 1.22699 | - |
| **BARX2** | **ENSG00000043039** | - | - | - | - | 1.21355 | - |
| **UBTD2** | **ENSG00000168246** | - | - | - | - | 1.20447 | - |
| **FAM83B** | **ENSG00000168143** | - | - | - | - | 1.17571 | - |
| **TMEM51** | **ENSG00000171729** | - | - | - | - | 1.16995 | - |
| **ELL2P1** | **ENSG00000227295** | - | - | - | - | 1.16804 | - |
| **FEM1C** | **ENSG00000145780** | - | - | - | - | 1.16571 | - |
| **CHD2** | **ENSG00000173575** | - | - | - | - | 1.11538 | - |
| **CD109** | **ENSG00000156535** | - | - | - | - | 1.06067 | - |
| **F2RL1** | **ENSG00000164251** | - | - | - | - | 1.05998 | - |
| **PPP1R14C** | **ENSG00000198729** | - | - | - | - | 1.03528 | - |
| **PANX1** | **ENSG00000110218** | - | - | - | - | 1.0224 | - |
| **GJA1** | **ENSG00000152661** | - | - | - | - | 1.00919 | - |
| **TRAM2** | **ENSG00000065308** | - | - | - | - | -1.16522 | - |
| **CNFN** | **ENSG00000105427** | - | - | - | - | -1.2854 | - |
| **PRMT6** | **ENSG00000198890** | - | - | - | - | -1.4283 | - |
| **E2F1** | **ENSG00000101412** | - | - | - | - | -1.47602 | - |
| **SPRR2B** | **ENSG00000196805** | - | - | - | - | -1.5018 | - |
| **PRKXP1** | **ENSG00000270127** | - | - | - | - | -1.65207 | - |
| **FOXA2** | **ENSG00000125798** | - | - | - | - | -1.87187 | - |
| **TRAM1L1** | **ENSG00000174599** | - | - | - | - | -1.95382 | - |
| **GIMAP2** | **ENSG00000106560** | - | - | - | - | -2.05726 | - |
| **ERHP1** | **ENSG00000254270** | - | - | - | - | -2.41745 | - |
| **AC112229.1** | **ENSG00000230650** | - | - | - | - | -2.45199 | - |
| **RP4-564F22.5** | **ENSG00000224635** | - | - | - | - | -2.57611 | - |
| **FOXD4** | **ENSG00000170122** | - | - | - | - | -2.61234 | - |
| **RP5-882O7.1** | **ENSG00000226499** | - | -4.8654 | - | - | -2.6678 | - |
| **LCE1A** | **ENSG00000186844** | - | - | - | - | -2.73478 | -2.8838 |
| **HMGN2P17** | **ENSG00000238249** | - | - | - | - | -2.89802 | - |
| **HIST1H3G** | **ENSG00000273983** | - | - | - | - | -2.92535 | 2.48176 |
| **EIF3CL** | **ENSG00000205609** | - | - | - | - | -3.32029 | - |
| **RPS19P1** | **ENSG00000214612** | 7.98943 | - | - | - | - | - |
| **HSPB1P2** | **ENSG00000230216** | 6.72748 | - | - | - | - | - |
| **RP11-229M1.2** | **ENSG00000214908** | 6.31826 | - | - | - | - | - |
| **RPS24P17** | **ENSG00000243988** | 5.64476 | - | - | - | - | - |
| **DLX2** | **ENSG00000115844** | 4.90363 | - | - | - | - | - |
| **HEY1** | **ENSG00000164683** | 4.49274 | - | - | - | - | - |
| **RPL5P3** | **ENSG00000242276** | 4.38304 | - | - | - | - | - |
| **DLX3** | **ENSG00000064195** | 4.11415 | - | - | - | - | - |
| **HR** | **ENSG00000168453** | 3.72482 | - | - | - | - | - |
| **EEF1A1P14** | **ENSG00000233057** | 3.49639 | - | - | - | - | - |
| **BCL11B** | **ENSG00000127152** | 3.24828 | - | - | - | - | - |
| **GPR83** | **ENSG00000123901** | 3.16207 | - | - | - | - | - |
| **YBX1P6** | **ENSG00000213539** | 2.94749 | - | - | - | - | - |
| **KRT18P4** | **ENSG00000229222** | 2.75826 | - | - | - | - | - |
| **CTB-12A17.2** | **ENSG00000279161** | 2.7135 | - | - | - | - | - |
| **FZD7** | **ENSG00000155760** | 2.68834 | - | - | - | - | - |
| **FGF18** | **ENSG00000156427** | 2.6617 | - | - | - | - | - |
| **SYDE2** | **ENSG00000097096** | 2.64942 | - | - | - | - | - |
| **SSTR5** | **ENSG00000162009** | 2.64888 | - | - | - | - | - |
| **UBE2QL1** | **ENSG00000215218** | 2.59301 | - | - | - | - | - |
| **BCOR** | **ENSG00000183337** | 2.58764 | 1.69675 | - | - | - | - |
| **RPS24P8** | **ENSG00000224094** | 2.55865 | - | - | - | - | - |
| **IRS1** | **ENSG00000169047** | 2.43833 | - | - | - | - | - |
| **CYP1B1** | **ENSG00000138061** | 2.41314 | - | - | - | - | - |
| **PPP1R3C** | **ENSG00000119938** | 2.37802 | 1.68984 | - | - | - | - |
| **NOG** | **ENSG00000183691** | 2.33646 | - | - | - | - | - |
| **RHOU** | **ENSG00000116574** | 2.32203 | - | - | - | - | - |
| **CXXC5** | **ENSG00000171604** | 2.21441 | - | - | - | - | - |
| **RP11-848G14.5** | **ENSG00000250138** | 2.10423 | - | - | - | - | - |
| **CLDN23** | **ENSG00000253958** | 2.05836 | - | - | - | - | - |
| **SMAD6** | **ENSG00000137834** | 2.03076 | - | - | - | - | - |
| **HEY2** | **ENSG00000135547** | 2.02827 | - | - | - | - | - |
| **RP11-33E12.2** | **ENSG00000280099** | 2.01567 | - | - | - | - | - |
| **GAS1** | **ENSG00000180447** | 1.89544 | - | - | - | - | - |
| **RP11-54O7.17** | **ENSG00000272512** | 1.87282 | - | - | - | - | -2.77232 |
| **KAZN** | **ENSG00000189337** | 1.85951 | - | - | - | - | - |
| **SKIDA1** | **ENSG00000180592** | 1.83115 | - | - | - | - | - |
| **GATA5** | **ENSG00000130700** | 1.8049 | - | - | - | - | - |
| **FZD1** | **ENSG00000157240** | 1.80344 | - | - | - | - | - |
| **ARHGAP20** | **ENSG00000137727** | 1.79881 | - | - | - | - | - |
| **CYP27C1** | **ENSG00000186684** | 1.79093 | - | - | - | - | - |
| **B3GNT7** | **ENSG00000156966** | 1.78735 | - | - | - | - | - |
| **MAP3K8** | **ENSG00000107968** | 1.69923 | - | - | - | - | - |
| **GJA4** | **ENSG00000187513** | 1.65649 | -1.69462 | - | - | - | - |
| **WNT9A** | **ENSG00000143816** | 1.63034 | - | - | - | 1.76684 | - |
| **LFNG** | **ENSG00000106003** | 1.59077 | - | - | - | - | - |
| **RP11-346C4.3** | **ENSG00000274718** | 1.55126 | - | - | - | - | - |
| **KLF3** | **ENSG00000109787** | 1.53375 | - | - | - | - | - |
| **ATOH8** | **ENSG00000168874** | 1.4959 | - | - | - | - | - |
| **TTC9** | **ENSG00000133985** | 1.47513 | - | - | - | - | - |
| **C8orf4** | **ENSG00000176907** | 1.47 | 1.16643 | - | - | - | - |
| **SNAI2** | **ENSG00000019549** | 1.42714 | - | - | - | - | - |
| **MOAP1** | **ENSG00000165943** | 1.41555 | - | - | - | - | - |
| **NOS1** | **ENSG00000089250** | 1.31868 | - | - | - | - | - |
| **INAFM2** | **ENSG00000259330** | 1.30815 | - | - | - | - | - |
| **PRICKLE2** | **ENSG00000163637** | 1.30406 | - | - | - | - | - |
| **UNC5B** | **ENSG00000107731** | 1.27011 | - | - | - | - | - |
| **FZD8** | **ENSG00000177283** | 1.24714 | - | - | - | - | - |
| **REST** | **ENSG00000084093** | 1.2193 | - | - | - | - | - |
| **ID1** | **ENSG00000125968** | 1.21888 | - | - | - | - | - |
| **GATA6** | **ENSG00000141448** | 1.17795 | - | - | - | - | - |
| **ZBTB2** | **ENSG00000181472** | 1.03605 | - | - | - | - | - |
| **TAGLN** | **ENSG00000149591** | -1.02732 | - | - | - | - | - |
| **TMEM160** | **ENSG00000130748** | -1.04129 | - | - | - | - | - |
| **TNFSF15** | **ENSG00000181634** | -1.05039 | - | - | - | - | - |
| **TPX2** | **ENSG00000088325** | -1.05472 | - | - | - | - | - |
| **DIAPH3** | **ENSG00000139734** | -1.07248 | - | - | - | - | - |
| **JRKL** | **ENSG00000183340** | -1.09926 | - | - | - | - | - |
| **RP11-572P18.1** | **ENSG00000220842** | -1.10398 | - | - | - | - | - |
| **ZNF70** | **ENSG00000187792** | -1.11167 | - | - | - | - | - |
| **FANCF** | **ENSG00000183161** | -1.14186 | - | - | - | - | - |
| **MIR222HG** | **ENSG00000270069** | -1.14363 | - | - | - | 1.12162 | - |
| **GTSE1** | **ENSG00000075218** | -1.15565 | - | - | - | - | - |
| **CCNA2** | **ENSG00000145386** | -1.17361 | - | - | - | - | - |
| **ASPM** | **ENSG00000066279** | -1.17364 | - | - | - | - | - |
| **NEK2** | **ENSG00000117650** | -1.19282 | - | - | - | - | - |
| **MT2P1** | **ENSG00000162840** | -1.1958 | - | - | - | - | 1.57486 |
| **AC005789.11** | **ENSG00000267473** | -1.20517 | - | - | - | - | - |
| **CDCA8** | **ENSG00000134690** | -1.21176 | - | - | - | - | - |
| **UBE2C** | **ENSG00000175063** | -1.23205 | - | - | - | - | - |
| **CDK1** | **ENSG00000170312** | -1.23713 | - | - | - | - | - |
| **CCNB1** | **ENSG00000134057** | -1.26024 | - | - | - | - | - |
| **FUT1** | **ENSG00000174951** | -1.30942 | - | - | - | - | - |
| **CDC20** | **ENSG00000117399** | -1.32127 | - | - | - | - | - |
| **CDC20P1** | **ENSG00000231007** | -1.33881 | - | - | - | - | - |
| **ZFP36L2** | **ENSG00000152518** | -1.37264 | - | - | - | - | - |
| **CXCR4** | **ENSG00000121966** | -1.43774 | - | - | - | - | - |
| **C1orf132** | **ENSG00000203709** | -1.46407 | - | - | - | - | - |
| **FAM155A** | **ENSG00000204442** | -1.47012 | - | - | - | - | - |
| **FAM83D** | **ENSG00000101447** | -1.47875 | - | - | - | - | - |
| **CTD-2587M2.1** | **ENSG00000249476** | -1.55599 | - | - | - | - | - |
| **FST** | **ENSG00000134363** | -1.59765 | - | - | - | - | - |
| **SLC16A13** | **ENSG00000174327** | -1.60477 | - | - | - | - | - |
| **ESM1** | **ENSG00000164283** | -1.6084 | - | - | - | - | - |
| **C2CD4B** | **ENSG00000205502** | -1.85062 | - | - | - | - | - |
| **VEGFC** | **ENSG00000150630** | -1.88167 | - | - | - | - | - |
| **SIRT4** | **ENSG00000089163** | -1.92787 | - | - | - | - | - |
| **EMILIN2** | **ENSG00000132205** | -1.94634 | - | - | - | - | - |
| **TNFSF4** | **ENSG00000117586** | -1.97446 | - | - | - | - | - |
| **PLAC8** | **ENSG00000145287** | -2.02409 | - | - | - | - | - |
| **CXCL8** | **ENSG00000169429** | -2.0424 | - | - | - | 2.82503 | - |
| **IL6** | **ENSG00000136244** | -2.15134 | - | - | - | - | - |
| **HS6ST3** | **ENSG00000185352** | -2.20424 | - | - | - | - | - |
| **TRAF1** | **ENSG00000056558** | -2.3799 | - | - | - | 1.67671 | - |
| **LAMP5** | **ENSG00000125869** | -2.57901 | - | - | - | - | - |
| **VSIG4** | **ENSG00000155659** | -2.58958 | - | - | - | - | - |
| **MMP9** | **ENSG00000100985** | -2.84082 | - | - | - | - | - |
| **HLA-DRB5** | **ENSG00000198502** | -3.01127 | -5.80087 | - | - | - | - |
| **PTPRC** | **ENSG00000081237** | -3.08055 | - | - | - | - | - |
| **SELE** | **ENSG00000007908** | -3.21019 | - | - | - | - | - |
| **C1QB** | **ENSG00000173369** | -3.33798 | -7.2316 | - | - | - | - |
| **VCAM1** | **ENSG00000162692** | -3.35937 | - | - | - | - | - |
| **S100A9** | **ENSG00000163220** | -3.46799 | - | - | - | - | - |
| **ATP6V0D2** | **ENSG00000147614** | -4.40807 | - | - | - | - | - |
| **STK19B** | **ENSG00000250535** | -4.82548 | - | - | - | - | - |
| **AC008132.13** | **ENSG00000161103** | -6.1298 | - | - | - | - | - |
| **LYZ** | **ENSG00000090382** | -3.13472 | -4.75932 | -1.79769e+308 | - | - | - |
| **MPEG1** | **ENSG00000197629** | -3.53941 | -1.79769e+308 | -1.79769e+308 | - | - | - |
| **RP5-1120P11.4** | **ENSG00000183239** | - | - | - | -1.79769e+308 | -1.79769e+308 | - |
| **SMIM11** | **ENSG00000205670** | - | - | - | -1.79769e+308 | -1.79769e+308 | - |
| **CDC42P4** | **ENSG00000249965** | - | - | - | -1.79769e+308 | - | - |
| **LINC00302** | **ENSG00000176075** | - | - | - | -1.79769e+308 | - | - |
| **RP11-98D18.17** | **ENSG00000269489** | - | - | - | -1.79769e+308 | - | - |
| **AP000255.6** | **ENSG00000273091** | - | - | - | -1.79769e+308 | - | -1.79769e+308 |
| **FAM183B** | **ENSG00000164556** | - | - | - | 1.79769e+308 | - | - |
|  |  |  |  |  |  |  |  |
