# Supplementary material for: New signaling pathways govern the host response to C. albicans infection in various niches
Source: HighWire-hosted journal article supplement (doi:10.1101/gr.187427.114), 2015-04-09
Supplement: TableS6.docx [file TableS6.docx]

| **Table S6. Results for Upstream Regulator Analysis for each of the *in vitro* infections.** | | | | | |
| --- | --- | --- | --- | --- | --- |
|  |  |  |  |  |  |
| **Infection** | **Upstream Regulator** | **Molecule Type** | **Predicted Activation State** | **Activation z-score** | **p-value of overlap** |
| **HUVEC; 1.5 h** | NOTCH1 | transcription regulator | Activated | 2.864 | 1.13E-10 |
| IL1RN | cytokine | Activated | 2.773 | 9.07E-07 |
| PPARG | ligand-dependent nuclear receptor | Activated | 2.622 | 3.13E-05 |
| BMP4 | growth factor | Activated | 2.495 | 2.40E-12 |
| STAT5B | transcription regulator | Activated | 2.449 | 5.41E-05 |
| IL11 | cytokine | Activated | 2.400 | 6.12E-07 |
| WNT3A | cytokine | Activated | 2.258 | 5.37E-11 |
| HMOX1 | enzyme | Activated | 2.251 | 2.23E-07 |
| SMAD4 | transcription regulator | Activated | 2.231 | 6.60E-07 |
| NOTCH3 | transcription regulator | Activated | 2.219 | 4.39E-06 |
| BMP2 | growth factor | Activated | 2.207 | 6.47E-14 |
| CNTF | cytokine | Activated | 2.174 | 9.69E-06 |
| MEOX2 | transcription regulator | Activated | 2.160 | 1.01E-10 |
| Alpha catenin | group | Activated | 2.158 | 5.35E-08 |
| INSR | kinase | Activated | 2.156 | 1.57E-08 |
| PTEN | phosphatase | Activated | 2.093 | 6.90E-09 |
| BMP15 | growth factor | Activated | 2.000 | 8.18E-06 |
| GDF9 | growth factor | Activated | 2.000 | 7.49E-05 |
| INSIG1 | other | Activated | 2.000 | 3.67E-04 |
| CCND1 | transcription regulator | Inhibited | -2.000 | 1.32E-03 |
| TBX2 | transcription regulator | Inhibited | -2.000 | 1.28E-03 |
| TRAF2 | enzyme | Inhibited | -2.010 | 4.15E-07 |
| CSF1 | cytokine | Inhibited | -2.052 | 7.38E-07 |
| HMGB1 | transcription regulator | Inhibited | -2.071 | 1.86E-08 |
| TLR4 | transmembrane receptor | Inhibited | -2.082 | 4.06E-04 |
| F2 | peptidase | Inhibited | -2.127 | 5.76E-08 |
| TNF | cytokine | Inhibited | -2.142 | 1.63E-13 |
| RELA | transcription regulator | Inhibited | -2.181 | 5.83E-05 |
| PTGER2 | g-protein coupled receptor | Inhibited | -2.183 | 1.47E-08 |
| TRADD | other | Inhibited | -2.200 | 7.91E-07 |
| RET | kinase | Inhibited | -2.204 | 3.76E-07 |
| IL18 | cytokine | Inhibited | -2.219 | 1.53E-03 |
| IFI16 | transcription regulator | Inhibited | -2.236 | 9.03E-05 |
| FSH | complex | Inhibited | -2.313 | 5.33E-06 |
| IL1A | cytokine | Inhibited | -2.409 | 7.88E-07 |
| Vegf | group | Inhibited | -2.498 | 7.21E-14 |
| CD40 | transmembrane receptor | Inhibited | -2.612 | 4.24E-09 |
| TNFSF12 | cytokine | Inhibited | -2.660 | 1.86E-08 |
| NKX2-3 | transcription regulator | Inhibited | -3.016 | 9.19E-09 |
| **HUVEC; 5h** | TNF | cytokine | Activated | 4.661 | 1.69E-26 |
| PDGF BB | complex | Activated | 4.480 | 1.38E-23 |
| TGFB1 | growth factor | Activated | 4.271 | 2.05E-21 |
| AGT | growth factor | Activated | 3.974 | 1.88E-12 |
| IL1B | cytokine | Activated | 3.961 | 3.05E-26 |
| NFkB (complex) | complex | Activated | 3.880 | 2.87E-10 |
| IL1 | group | Activated | 3.524 | 4.54E-13 |
| HIF1A | transcription regulator | Activated | 3.482 | 2.51E-09 |
| TNFSF11 | cytokine | Activated | 3.216 | 1.47E-11 |
| IL2 | cytokine | Activated | 3.203 | 1.36E-07 |
| TREM1 | transmembrane receptor | Activated | 3.162 | 5.85E-08 |
| IKBKG | kinase | Activated | 3.130 | 8.97E-12 |
| RELA | transcription regulator | Activated | 3.111 | 1.21E-06 |
| IKBKB | kinase | Activated | 3.099 | 1.50E-10 |
| FOXL2 | transcription regulator | Activated | 2.990 | 1.80E-11 |
| P38 MAPK | group | Activated | 2.988 | 7.18E-14 |
| TCR | complex | Activated | 2.955 | 1.48E-05 |
| CREB1 | transcription regulator | Activated | 2.952 | 8.40E-14 |
| ERBB2 | kinase | Activated | 2.905 | 2.69E-10 |
| MYD88 | other | Activated | 2.904 | 1.25E-08 |
| Pkc(s) | group | Activated | 2.873 | 2.77E-09 |
| F2 | peptidase | Activated | 2.840 | 4.00E-10 |
| IL3 | cytokine | Activated | 2.812 | 6.92E-09 |
| Tgf beta | group | Activated | 2.734 | 1.26E-09 |
| ERK | group | Activated | 2.697 | 2.56E-14 |
| SMAD3 | transcription regulator | Activated | 2.677 | 1.17E-07 |
| SYVN1 | transporter | Activated | 2.646 | 5.32E-06 |
| NEDD9 | other | Activated | 2.646 | 5.07E-10 |
| PDX1 | transcription regulator | Activated | 2.646 | 1.53E-06 |
| RAF1 | kinase | Activated | 2.630 | 8.00E-05 |
| CD40LG | cytokine | Activated | 2.621 | 5.23E-07 |
| EDN1 | cytokine | Activated | 2.620 | 4.94E-05 |
| FGF2 | growth factor | Activated | 2.610 | 1.24E-07 |
| Interferon alpha | group | Activated | 2.601 | 1.25E-03 |
| EGF | growth factor | Activated | 2.601 | 1.62E-09 |
| TICAM1 | other | Activated | 2.592 | 2.34E-07 |
| MAP3K8 | kinase | Activated | 2.570 | 4.82E-06 |
| ELK1 | transcription regulator | Activated | 2.551 | 2.66E-09 |
| OSM | cytokine | Activated | 2.550 | 5.24E-08 |
| Pdgf (complex) | complex | Activated | 2.530 | 4.90E-07 |
| Cg | complex | Activated | 2.522 | 1.32E-09 |
| NFKBIA | transcription regulator | Activated | 2.457 | 2.03E-11 |
| PPIF | enzyme | Activated | 2.449 | 3.20E-06 |
| CHUK | kinase | Activated | 2.439 | 6.20E-13 |
| STAT3 | transcription regulator | Activated | 2.435 | 3.02E-15 |
| MAP2K1 | kinase | Activated | 2.423 | 6.46E-10 |
| TNFRSF1A | transmembrane receptor | Activated | 2.415 | 2.12E-05 |
| KRAS | enzyme | Activated | 2.412 | 6.46E-07 |
| STAT4 | transcription regulator | Activated | 2.400 | 6.13E-04 |
| MAP2K1/2 | group | Activated | 2.387 | 4.24E-07 |
| SRC | kinase | Activated | 2.383 | 2.73E-05 |
| POMC | other | Activated | 2.381 | 5.96E-06 |
| TLR2 | transmembrane receptor | Activated | 2.371 | 5.07E-06 |
| LDL | complex | Activated | 2.365 | 2.50E-08 |
| MAPK14 | kinase | Activated | 2.360 | 6.18E-08 |
| IL6 | cytokine | Activated | 2.309 | 7.93E-11 |
| LEP | growth factor | Activated | 2.296 | 2.28E-05 |
| Vegf | group | Activated | 2.252 | 1.56E-09 |
| IL17A | cytokine | Activated | 2.246 | 1.29E-09 |
| EIF4E | translation regulator | Activated | 2.236 | 6.17E-04 |
| EIF2AK2 | kinase | Activated | 2.236 | 7.12E-05 |
| RPS6KA5 | kinase | Activated | 2.223 | 8.63E-09 |
| BMP6 | growth factor | Activated | 2.219 | 7.53E-05 |
| CCL5 | cytokine | Activated | 2.215 | 2.36E-09 |
| CXCL12 | cytokine | Activated | 2.213 | 1.96E-03 |
| LIF | cytokine | Activated | 2.211 | 3.46E-09 |
| ARNT | transcription regulator | Activated | 2.200 | 1.18E-06 |
| EPO | cytokine | Activated | 2.200 | 2.50E-03 |
| F2R | g-protein coupled receptor | Activated | 2.198 | 8.51E-06 |
| TGFB3 | growth factor | Activated | 2.195 | 1.15E-04 |
| TLR4 | transmembrane receptor | Activated | 2.190 | 1.28E-05 |
| STAT | group | Activated | 2.186 | 9.96E-07 |
| CTNNB1 | transcription regulator | Activated | 2.172 | 4.24E-06 |
| TLR3 | transmembrane receptor | Activated | 2.172 | 8.45E-04 |
| FN1 | enzyme | Activated | 2.163 | 6.42E-05 |
| C5 | cytokine | Activated | 2.157 | 6.02E-08 |
| PTGS2 | enzyme | Activated | 2.156 | 6.59E-04 |
| YBX1 | transcription regulator | Activated | 2.144 | 4.95E-09 |
| EGR1 | transcription regulator | Activated | 2.129 | 1.21E-07 |
| Ras | group | Activated | 2.108 | 1.50E-07 |
| IL1A | cytokine | Activated | 2.097 | 9.03E-05 |
| PSEN1 | peptidase | Activated | 2.092 | 2.14E-03 |
| Jnk | group | Activated | 2.083 | 2.87E-06 |
| NUPR1 | transcription regulator | Activated | 2.064 | 3.66E-08 |
| F7 | peptidase | Activated | 2.057 | 2.08E-10 |
| CSF2 | cytokine | Activated | 2.045 | 4.66E-11 |
| HGF | growth factor | Activated | 2.036 | 3.37E-11 |
| IL5 | cytokine | Activated | 2.012 | 5.13E-05 |
| Akt | group | Activated | 2.008 | 1.13E-08 |
| EIF2AK3 | kinase | Activated | 2.000 | 1.09E-04 |
| PRKCE | kinase | Activated | 2.000 | 3.10E-04 |
| STAT5B | transcription regulator | Activated | 2.000 | 1.12E-03 |
| NR5A2 | ligand-dependent nuclear receptor | Activated | 2.000 | 7.60E-04 |
| NR3C1 | ligand-dependent nuclear receptor | Inhibited | -2.155 | 2.92E-10 |
| FBXO32 | enzyme | Inhibited | -2.216 | 5.65E-05 |
| SOCS1 | other | Inhibited | -2.236 | 1.72E-05 |
| MEOX2 | transcription regulator | Inhibited | -2.236 | 1.50E-06 |
| KLF2 | transcription regulator | Inhibited | -2.388 | 4.47E-07 |
| THRB | ligand-dependent nuclear receptor | Inhibited | -2.630 | 2.33E-05 |
| **HUVEC; 8 h** | TNF | cytokine | Activated | 5.620 | 3.44E-25 |
| NFkB (complex) | complex | Activated | 5.027 | 9.43E-16 |
| IL1B | cytokine | Activated | 4.849 | 3.21E-25 |
| PDGF BB | complex | Activated | 3.997 | 2.85E-21 |
| NUPR1 | transcription regulator | Activated | 3.817 | 1.48E-12 |
| AGT | growth factor | Activated | 3.803 | 1.48E-10 |
| IKBKB | kinase | Activated | 3.763 | 2.08E-11 |
| TNFSF11 | cytokine | Activated | 3.750 | 2.91E-15 |
| HIF1A | transcription regulator | Activated | 3.645 | 1.08E-12 |
| P38 MAPK | group | Activated | 3.578 | 5.75E-15 |
| ERK | group | Activated | 3.366 | 1.34E-11 |
| Vegf | group | Activated | 3.331 | 1.12E-10 |
| F2 | peptidase | Activated | 3.331 | 6.43E-10 |
| PDX1 | transcription regulator | Activated | 3.317 | 8.86E-09 |
| CD40LG | cytokine | Activated | 3.269 | 6.67E-08 |
| IKBKG | kinase | Activated | 3.225 | 3.32E-13 |
| IL1 | group | Activated | 3.219 | 8.56E-11 |
| Cg | complex | Activated | 3.200 | 3.83E-13 |
| EDN1 | cytokine | Activated | 3.111 | 4.98E-07 |
| Tgf beta | group | Activated | 3.060 | 5.61E-08 |
| TGFB1 | growth factor | Activated | 3.053 | 2.55E-19 |
| FGF2 | growth factor | Activated | 3.041 | 5.18E-08 |
| SYVN1 | transporter | Activated | 3.000 | 8.73E-06 |
| STAT3 | transcription regulator | Activated | 2.950 | 6.83E-11 |
| IL17A | cytokine | Activated | 2.876 | 1.78E-13 |
| HGF | growth factor | Activated | 2.805 | 1.23E-10 |
| MYD88 | other | Activated | 2.775 | 3.06E-07 |
| IL3 | cytokine | Activated | 2.774 | 3.42E-09 |
| STAT4 | transcription regulator | Activated | 2.771 | 1.14E-03 |
| RELA | transcription regulator | Activated | 2.750 | 2.65E-10 |
| FOXL2 | transcription regulator | Activated | 2.735 | 7.13E-13 |
| CHUK | kinase | Activated | 2.656 | 5.14E-14 |
| TRADD | other | Activated | 2.630 | 9.31E-09 |
| IL2 | cytokine | Activated | 2.621 | 1.84E-08 |
| PRKCA | kinase | Activated | 2.611 | 5.39E-07 |
| TLR2 | transmembrane receptor | Activated | 2.605 | 6.12E-05 |
| TGFA | growth factor | Activated | 2.595 | 1.29E-06 |
| TLR3 | transmembrane receptor | Activated | 2.589 | 3.76E-04 |
| CREB1 | transcription regulator | Activated | 2.584 | 9.58E-09 |
| SMAD3 | transcription regulator | Activated | 2.577 | 1.60E-06 |
| TREM1 | transmembrane receptor | Activated | 2.563 | 1.50E-11 |
| ELK1 | transcription regulator | Activated | 2.551 | 3.09E-07 |
| POU5F1 | transcription regulator | Activated | 2.518 | 2.48E-04 |
| CD40 | transmembrane receptor | Activated | 2.457 | 1.05E-07 |
| ERBB2 | kinase | Activated | 2.456 | 3.16E-11 |
| NR5A2 | ligand-dependent nuclear receptor | Activated | 2.449 | 1.67E-04 |
| TCR | complex | Activated | 2.434 | 1.29E-06 |
| SRC | kinase | Activated | 2.419 | 2.67E-06 |
| OSM | cytokine | Activated | 2.419 | 2.90E-09 |
| ARNT | transcription regulator | Activated | 2.415 | 1.36E-06 |
| EPO | cytokine | Activated | 2.414 | 9.59E-05 |
| Nfat (family) | group | Activated | 2.414 | 2.04E-04 |
| F2R | g-protein coupled receptor | Activated | 2.412 | 1.85E-05 |
| TGFB3 | growth factor | Activated | 2.410 | 3.76E-04 |
| RAF1 | kinase | Activated | 2.408 | 1.58E-07 |
| IL7 | cytokine | Activated | 2.397 | 7.71E-08 |
| MAP3K8 | kinase | Activated | 2.390 | 7.72E-06 |
| Mapk | group | Activated | 2.384 | 7.75E-05 |
| TNFSF13B | cytokine | Activated | 2.382 | 8.31E-06 |
| Pkc(s) | group | Activated | 2.377 | 3.17E-06 |
| CXCL12 | cytokine | Activated | 2.377 | 7.23E-05 |
| EGR1 | transcription regulator | Activated | 2.376 | 6.85E-07 |
| Akt | group | Activated | 2.358 | 5.55E-10 |
| EGF | growth factor | Activated | 2.323 | 6.43E-11 |
| LDL | complex | Activated | 2.316 | 1.33E-08 |
| Ras | group | Activated | 2.306 | 2.60E-05 |
| IL6 | cytokine | Activated | 2.302 | 2.24E-09 |
| KRAS | enzyme | Activated | 2.266 | 6.15E-10 |
| ARNT2 | transcription regulator | Activated | 2.236 | 4.02E-02 |
| CD5 | transmembrane receptor | Activated | 2.236 | 1.90E-04 |
| RPS6KA5 | kinase | Activated | 2.223 | 2.71E-07 |
| EIF2AK2 | kinase | Activated | 2.219 | 2.18E-04 |
| NOD2 | other | Activated | 2.219 | 3.71E-05 |
| TLR7 | transmembrane receptor | Activated | 2.215 | 4.55E-03 |
| TLR9 | transmembrane receptor | Activated | 2.213 | 1.57E-02 |
| RETN | other | Activated | 2.209 | 6.17E-05 |
| FN1 | enzyme | Activated | 2.207 | 3.21E-05 |
| MTOR | kinase | Activated | 2.200 | 3.86E-05 |
| ICAM1 | transmembrane receptor | Activated | 2.200 | 4.85E-05 |
| IL1A | cytokine | Activated | 2.189 | 5.09E-05 |
| MAP2K1/2 | group | Activated | 2.189 | 5.24E-09 |
| CCL5 | cytokine | Activated | 2.187 | 5.06E-07 |
| CXCR4 | g-protein coupled receptor | Activated | 2.186 | 1.90E-04 |
| TNFRSF1B | transmembrane receptor | Activated | 2.183 | 6.54E-04 |
| PI3K (complex) | complex | Activated | 2.180 | 1.27E-07 |
| TICAM1 | other | Activated | 2.178 | 4.95E-06 |
| ATF4 | transcription regulator | Activated | 2.160 | 2.55E-08 |
| MAP3K1 | kinase | Activated | 2.156 | 1.74E-04 |
| REL | transcription regulator | Activated | 2.152 | 3.28E-04 |
| YBX1 | transcription regulator | Activated | 2.144 | 2.90E-08 |
| PRKCE | kinase | Activated | 2.137 | 2.50E-07 |
| NEDD9 | other | Activated | 2.121 | 2.17E-09 |
| FOXO1 | transcription regulator | Activated | 2.085 | 6.18E-07 |
| LEP | growth factor | Activated | 2.078 | 6.16E-08 |
| EPAS1 | transcription regulator | Activated | 2.052 | 2.82E-14 |
| CSF2 | cytokine | Activated | 2.044 | 2.38E-09 |
| C5 | cytokine | Activated | 2.035 | 1.07E-07 |
| EIF2AK3 | kinase | Activated | 2.027 | 9.45E-12 |
| IFNG | cytokine | Activated | 2.020 | 2.35E-19 |
| TMEM173 | other | Activated | 2.000 | 1.94E-04 |
| F2RL1 | g-protein coupled receptor | Activated | 2.000 | 4.89E-07 |
| PPRC1 | transcription regulator | Activated | 2.000 | 1.07E-03 |
| SELPLG | other | Activated | 2.000 | 3.24E-04 |
| LEPR | transmembrane receptor | Activated | 2.000 | 1.99E-02 |
| GPC1 | transmembrane receptor | Activated | 2.000 | 1.46E-04 |
| GAST | other | Activated | 2.000 | 7.26E-03 |
| GMNN | transcription regulator | Inhibited | -2.000 | 6.93E-03 |
| SOX1 | transcription regulator | Inhibited | -2.000 | 5.43E-03 |
| TCF3 | transcription regulator | Inhibited | -2.000 | 6.20E-03 |
| SOX3 | transcription regulator | Inhibited | -2.000 | 6.93E-03 |
| IgG | complex | Inhibited | -2.060 | 6.16E-08 |
| THRB | ligand-dependent nuclear receptor | Inhibited | -2.138 | 3.08E-04 |
| COL18A1 | other | Inhibited | -2.164 | 1.17E-09 |
| KLF2 | transcription regulator | Inhibited | -2.200 | 9.84E-06 |
| IL1RN | cytokine | Inhibited | -2.200 | 7.36E-03 |
| COMMD1 | transporter | Inhibited | -2.236 | 1.35E-06 |
| NKX2-3 | transcription regulator | Inhibited | -2.270 | 3.14E-08 |
| SOCS1 | other | Inhibited | -2.401 | 1.05E-04 |
| FBXO32 | enzyme | Inhibited | -2.800 | 1.57E-06 |
| **OKF6; 1.5 h** | TNF | cytokine | Activated | 5.091 | 1.13E-25 |
| PDGF BB | complex | Activated | 4.954 | 2.08E-28 |
| TGFB1 | growth factor | Activated | 4.426 | 2.58E-13 |
| CREB1 | transcription regulator | Activated | 4.353 | 2.45E-14 |
| Vegf | group | Activated | 4.258 | 3.77E-12 |
| NFkB (complex) | complex | Activated | 4.125 | 2.37E-14 |
| F2 | peptidase | Activated | 4.103 | 4.46E-12 |
| EGF | growth factor | Activated | 4.080 | 4.24E-17 |
| P38 MAPK | group | Activated | 4.038 | 9.91E-13 |
| IL1B | cytokine | Activated | 4.009 | 6.00E-24 |
| IFNG | cytokine | Activated | 3.921 | 2.90E-21 |
| TREM1 | transmembrane receptor | Activated | 3.877 | 5.34E-15 |
| HGF | growth factor | Activated | 3.875 | 2.23E-11 |
| IKBKB | kinase | Activated | 3.778 | 1.16E-12 |
| ERK | group | Activated | 3.746 | 7.41E-13 |
| CSF2 | cytokine | Activated | 3.652 | 6.84E-10 |
| NUPR1 | transcription regulator | Activated | 3.638 | 1.52E-06 |
| IL2 | cytokine | Activated | 3.515 | 2.05E-11 |
| VEGFA | growth factor | Activated | 3.501 | 4.69E-08 |
| Cg | complex | Activated | 3.469 | 9.48E-14 |
| IKBKG | kinase | Activated | 3.434 | 1.63E-10 |
| TNFSF11 | cytokine | Activated | 3.426 | 8.66E-07 |
| FOXO1 | transcription regulator | Activated | 3.404 | 4.36E-07 |
| IL1 | group | Activated | 3.356 | 1.47E-08 |
| Pkc(s) | group | Activated | 3.341 | 7.54E-09 |
| RAF1 | kinase | Activated | 3.282 | 1.42E-06 |
| TLR3 | transmembrane receptor | Activated | 3.267 | 5.83E-10 |
| OSM | cytokine | Activated | 3.265 | 4.77E-07 |
| MYD88 | other | Activated | 3.232 | 3.37E-07 |
| CD40LG | cytokine | Activated | 3.230 | 4.68E-09 |
| IL3 | cytokine | Activated | 3.162 | 1.67E-05 |
| FOXL2 | transcription regulator | Activated | 3.153 | 2.87E-12 |
| TICAM1 | other | Activated | 3.148 | 9.64E-09 |
| FGF2 | growth factor | Activated | 3.139 | 5.85E-06 |
| HIF1A | transcription regulator | Activated | 3.112 | 1.78E-06 |
| CHUK | kinase | Activated | 3.089 | 5.68E-12 |
| RELA | transcription regulator | Activated | 3.050 | 9.72E-11 |
| IL6 | cytokine | Activated | 2.987 | 1.51E-09 |
| EDN1 | cytokine | Activated | 2.954 | 3.52E-05 |
| CXCL12 | cytokine | Activated | 2.937 | 1.92E-05 |
| IL15 | cytokine | Activated | 2.933 | 1.93E-04 |
| CSF1 | cytokine | Activated | 2.932 | 8.89E-06 |
| STAT6 | transcription regulator | Activated | 2.930 | 5.06E-05 |
| IL1A | cytokine | Activated | 2.924 | 7.40E-05 |
| AGT | growth factor | Activated | 2.885 | 1.83E-09 |
| STAT3 | transcription regulator | Activated | 2.868 | 4.52E-09 |
| IL17A | cytokine | Activated | 2.859 | 2.86E-10 |
| Jnk | group | Activated | 2.832 | 3.14E-09 |
| IGF1 | growth factor | Activated | 2.822 | 4.68E-09 |
| NFKBIA | transcription regulator | Activated | 2.797 | 1.83E-09 |
| PDX1 | transcription regulator | Activated | 2.795 | 1.14E-06 |
| BDNF | growth factor | Activated | 2.792 | 2.49E-07 |
| PTH | other | Activated | 2.784 | 4.39E-09 |
| PPRC1 | transcription regulator | Activated | 2.777 | 3.78E-09 |
| APP | other | Activated | 2.774 | 1.13E-06 |
| MAPK8 | kinase | Activated | 2.770 | 3.94E-05 |
| FOXO3 | transcription regulator | Activated | 2.768 | 1.21E-06 |
| TLR9 | transmembrane receptor | Activated | 2.755 | 4.54E-08 |
| Tgf beta | group | Activated | 2.754 | 4.31E-07 |
| MAP3K1 | kinase | Activated | 2.741 | 1.26E-08 |
| ERBB2 | kinase | Activated | 2.720 | 3.44E-07 |
| LIF | cytokine | Activated | 2.639 | 8.87E-08 |
| REL | transcription regulator | Activated | 2.639 | 9.20E-05 |
| NOTCH1 | transcription regulator | Activated | 2.630 | 8.88E-04 |
| NCR2 | transmembrane receptor | Activated | 2.630 | 5.09E-11 |
| IL5 | cytokine | Activated | 2.603 | 6.76E-03 |
| TLR4 | transmembrane receptor | Activated | 2.601 | 6.86E-04 |
| MAP2K1 | kinase | Activated | 2.595 | 1.20E-10 |
| NRG1 | growth factor | Activated | 2.592 | 3.46E-10 |
| EIF2AK2 | kinase | Activated | 2.581 | 4.40E-08 |
| TLR2 | transmembrane receptor | Activated | 2.578 | 1.83E-05 |
| CSF3 | cytokine | Activated | 2.577 | 1.21E-06 |
| Pdgf (complex) | complex | Activated | 2.570 | 7.32E-09 |
| LDL | complex | Activated | 2.508 | 1.14E-08 |
| NEDD9 | other | Activated | 2.449 | 5.41E-07 |
| STAT4 | transcription regulator | Activated | 2.434 | 8.21E-03 |
| ELK1 | transcription regulator | Activated | 2.426 | 9.73E-08 |
| PRKCE | kinase | Activated | 2.425 | 1.71E-05 |
| PRKCA | kinase | Activated | 2.425 | 1.61E-06 |
| BMP6 | growth factor | Activated | 2.414 | 9.20E-05 |
| ATF4 | transcription regulator | Activated | 2.410 | 6.51E-07 |
| MAP2K1/2 | group | Activated | 2.406 | 8.70E-06 |
| Nfat (family) | group | Activated | 2.392 | 8.07E-05 |
| SRF | transcription regulator | Activated | 2.385 | 4.73E-05 |
| LEP | growth factor | Activated | 2.378 | 4.77E-06 |
| EGFR | kinase | Activated | 2.375 | 2.63E-10 |
| NFATC2 | transcription regulator | Activated | 2.367 | 2.15E-05 |
| KITLG | growth factor | Activated | 2.364 | 4.99E-04 |
| MAPK1 | kinase | Activated | 2.335 | 1.73E-03 |
| TCR | complex | Activated | 2.301 | 7.78E-04 |
| GH1 | growth factor | Activated | 2.292 | 5.60E-06 |
| NGF | growth factor | Activated | 2.281 | 2.92E-07 |
| Creb | group | Activated | 2.279 | 5.77E-09 |
| KLF4 | transcription regulator | Activated | 2.271 | 6.13E-05 |
| MET | kinase | Activated | 2.236 | 4.45E-04 |
| PTPRJ | phosphatase | Activated | 2.236 | 4.30E-05 |
| GNRH | group | Activated | 2.234 | 1.55E-06 |
| Ap1 | complex | Activated | 2.229 | 1.31E-03 |
| CREM | transcription regulator | Activated | 2.225 | 5.53E-17 |
| EPHB1 | kinase | Activated | 2.216 | 5.10E-09 |
| FN1 | enzyme | Activated | 2.216 | 2.66E-02 |
| F7 | peptidase | Activated | 2.203 | 6.96E-06 |
| ATF2 | transcription regulator | Activated | 2.203 | 3.95E-07 |
| NR5A2 | ligand-dependent nuclear receptor | Activated | 2.200 | 6.33E-04 |
| TLR7 | transmembrane receptor | Activated | 2.200 | 2.20E-03 |
| GNRH1 | other | Activated | 2.200 | 1.22E-04 |
| POMC | other | Activated | 2.198 | 9.72E-04 |
| F2R | g-protein coupled receptor | Activated | 2.195 | 1.03E-04 |
| POU5F1 | transcription regulator | Activated | 2.191 | 3.87E-04 |
| EP300 | transcription regulator | Activated | 2.188 | 8.87E-05 |
| TGFA | growth factor | Activated | 2.186 | 5.71E-05 |
| MAP2K4 | kinase | Activated | 2.186 | 1.12E-04 |
| MAP3K8 | kinase | Activated | 2.185 | 1.71E-08 |
| TLR5 | transmembrane receptor | Activated | 2.164 | 9.49E-06 |
| IL12 (complex) | complex | Activated | 2.164 | 5.18E-03 |
| IL18 | cytokine | Activated | 2.159 | 5.59E-03 |
| Mek | group | Activated | 2.159 | 4.76E-05 |
| SHH | peptidase | Activated | 2.156 | 2.89E-03 |
| Pka | complex | Activated | 2.106 | 8.82E-10 |
| PAF1 | other | Activated | 2.000 | 6.20E-04 |
| SAMSN1 | other | Activated | 2.000 | 5.48E-03 |
| NFYA | transcription regulator | Activated | 2.000 | 5.02E-04 |
| ELF4 | transcription regulator | Activated | 2.000 | 1.50E-04 |
| SPIB | transcription regulator | Activated | 2.000 | 2.68E-03 |
| CDC42 | enzyme | Activated | 2.000 | 1.32E-04 |
| MAP3K7 | kinase | Inhibited | -2.000 | 1.82E-04 |
| CD3 | complex | Inhibited | -2.122 | 2.99E-03 |
| PTGER4 | g-protein coupled receptor | Inhibited | -2.137 | 1.07E-06 |
| FAS | transmembrane receptor | Inhibited | -2.155 | 1.23E-05 |
| let-7 | microrna | Inhibited | -2.200 | 6.13E-03 |
| TAB1 | enzyme | Inhibited | -2.219 | 3.49E-06 |
| GMNN | transcription regulator | Inhibited | -2.236 | 4.45E-04 |
| SOX1 | transcription regulator | Inhibited | -2.236 | 3.23E-04 |
| SFTPA1 | transporter | Inhibited | -2.236 | 3.92E-04 |
| SOX3 | transcription regulator | Inhibited | -2.236 | 4.26E-05 |
| PRDM1 | transcription regulator | Inhibited | -2.236 | 3.14E-02 |
| IL1RN | cytokine | Inhibited | -2.393 | 5.64E-04 |
| NKX2-3 | transcription regulator | Inhibited | -2.439 | 2.62E-07 |
| COL18A1 | other | Inhibited | -2.813 | 7.58E-07 |
| IgG | complex | Inhibited | -2.828 | 7.62E-06 |
| **OKF6; 5 h** | TNF | cytokine | Activated | 6.172 | 2.00E-23 |
| IL1B | cytokine | Activated | 4.843 | 7.38E-22 |
| PDGF BB | complex | Activated | 4.756 | 3.12E-18 |
| NFkB (complex) | complex | Activated | 4.348 | 1.38E-11 |
| NUPR1 | transcription regulator | Activated | 4.233 | 3.10E-13 |
| IL1 | group | Activated | 4.119 | 2.18E-11 |
| IFNG | cytokine | Activated | 4.071 | 3.65E-19 |
| F2 | peptidase | Activated | 3.884 | 4.40E-11 |
| Cg | complex | Activated | 3.831 | 2.13E-18 |
| Vegf | group | Activated | 3.777 | 8.25E-10 |
| TNFSF11 | cytokine | Activated | 3.700 | 2.16E-09 |
| STAT3 | transcription regulator | Activated | 3.666 | 1.04E-07 |
| TREM1 | transmembrane receptor | Activated | 3.547 | 2.16E-09 |
| CD40LG | cytokine | Activated | 3.499 | 5.15E-11 |
| P38 MAPK | group | Activated | 3.485 | 4.96E-14 |
| OSM | cytokine | Activated | 3.482 | 2.84E-05 |
| HIF1A | transcription regulator | Activated | 3.452 | 1.17E-13 |
| APP | other | Activated | 3.391 | 3.62E-09 |
| IL5 | cytokine | Activated | 3.384 | 4.68E-07 |
| IKBKB | kinase | Activated | 3.381 | 1.31E-07 |
| MYD88 | other | Activated | 3.361 | 6.99E-09 |
| ERK | group | Activated | 3.346 | 9.79E-08 |
| FOXO1 | transcription regulator | Activated | 3.234 | 6.83E-08 |
| IL2 | cytokine | Activated | 3.231 | 1.49E-08 |
| CSF2 | cytokine | Activated | 3.225 | 5.84E-07 |
| CREB1 | transcription regulator | Activated | 3.217 | 2.64E-12 |
| RELA | transcription regulator | Activated | 3.206 | 1.35E-06 |
| IL4 | cytokine | Activated | 3.156 | 2.17E-10 |
| TP53 | transcription regulator | Activated | 3.123 | 9.89E-10 |
| IKBKG | kinase | Activated | 3.120 | 8.09E-09 |
| STAT4 | transcription regulator | Activated | 2.964 | 2.05E-05 |
| PPRC1 | transcription regulator | Activated | 2.941 | 3.32E-11 |
| TGFB1 | growth factor | Activated | 2.933 | 1.68E-14 |
| FGF2 | growth factor | Activated | 2.924 | 8.03E-04 |
| ERK1/2 | group | Activated | 2.894 | 8.67E-09 |
| EGF | growth factor | Activated | 2.873 | 5.69E-14 |
| NEDD9 | other | Activated | 2.828 | 1.72E-10 |
| IL1A | cytokine | Activated | 2.824 | 3.88E-07 |
| EPAS1 | transcription regulator | Activated | 2.800 | 9.55E-08 |
| TLR3 | transmembrane receptor | Activated | 2.797 | 7.28E-08 |
| TCR | complex | Activated | 2.771 | 2.62E-04 |
| IL3 | cytokine | Activated | 2.760 | 3.62E-06 |
| MAP3K8 | kinase | Activated | 2.747 | 4.70E-08 |
| TLR4 | transmembrane receptor | Activated | 2.745 | 1.55E-07 |
| AGT | growth factor | Activated | 2.676 | 1.71E-06 |
| CD38 | enzyme | Activated | 2.631 | 1.24E-04 |
| TICAM1 | other | Activated | 2.621 | 3.87E-06 |
| FOXL2 | transcription regulator | Activated | 2.621 | 2.71E-07 |
| EIF2AK2 | kinase | Activated | 2.613 | 2.02E-07 |
| EDN1 | cytokine | Activated | 2.606 | 4.89E-04 |
| NFKB1 | transcription regulator | Activated | 2.578 | 4.92E-07 |
| TLR2 | transmembrane receptor | Activated | 2.576 | 6.13E-06 |
| FN1 | enzyme | Activated | 2.569 | 6.26E-04 |
| FOXO3 | transcription regulator | Activated | 2.527 | 2.91E-06 |
| Pkc(s) | group | Activated | 2.521 | 7.16E-05 |
| CHUK | kinase | Activated | 2.489 | 1.33E-08 |
| IL15 | cytokine | Activated | 2.472 | 2.71E-07 |
| IL17A | cytokine | Activated | 2.466 | 5.50E-06 |
| PAF1 | other | Activated | 2.449 | 1.02E-06 |
| NFATC2 | transcription regulator | Activated | 2.433 | 4.98E-04 |
| PGR | ligand-dependent nuclear receptor | Activated | 2.425 | 8.33E-04 |
| NOD2 | other | Activated | 2.423 | 6.06E-06 |
| MAPK8 | kinase | Activated | 2.415 | 1.10E-04 |
| STAT6 | transcription regulator | Activated | 2.415 | 6.45E-04 |
| Nfat (family) | group | Activated | 2.412 | 3.51E-05 |
| CXCL12 | cytokine | Activated | 2.412 | 1.84E-03 |
| Ap1 | complex | Activated | 2.412 | 8.10E-05 |
| ATF4 | transcription regulator | Activated | 2.395 | 2.21E-06 |
| KITLG | growth factor | Activated | 2.393 | 1.82E-04 |
| TLR9 | transmembrane receptor | Activated | 2.392 | 1.22E-06 |
| CSF1 | cytokine | Activated | 2.391 | 1.13E-03 |
| ELF4 | transcription regulator | Activated | 2.390 | 1.07E-07 |
| MAP3K1 | kinase | Activated | 2.382 | 2.13E-06 |
| HGF | growth factor | Activated | 2.329 | 3.83E-10 |
| LIF | cytokine | Activated | 2.287 | 1.46E-06 |
| ERBB2 | kinase | Activated | 2.255 | 6.89E-07 |
| CTNNB1 | transcription regulator | Activated | 2.247 | 2.49E-03 |
| Mapk | group | Activated | 2.236 | 1.04E-04 |
| MET | kinase | Activated | 2.236 | 2.23E-04 |
| PTPRJ | phosphatase | Activated | 2.236 | 2.10E-05 |
| BMP6 | growth factor | Activated | 2.236 | 4.23E-04 |
| PDX1 | transcription regulator | Activated | 2.236 | 1.78E-04 |
| GH1 | growth factor | Activated | 2.228 | 1.17E-05 |
| RAF1 | kinase | Activated | 2.226 | 3.20E-07 |
| IL6 | cytokine | Activated | 2.220 | 5.80E-06 |
| IL12B | cytokine | Activated | 2.219 | 2.60E-05 |
| NRG1 | growth factor | Activated | 2.207 | 4.98E-09 |
| RET | kinase | Activated | 2.200 | 1.37E-05 |
| TLR7 | transmembrane receptor | Activated | 2.183 | 1.14E-03 |
| STAT1 | transcription regulator | Activated | 2.181 | 1.33E-05 |
| MAPK14 | kinase | Activated | 2.180 | 1.45E-06 |
| TNFRSF1A | transmembrane receptor | Activated | 2.178 | 1.58E-06 |
| LDL | complex | Activated | 2.177 | 1.10E-06 |
| IL12 (complex) | complex | Activated | 2.171 | 4.45E-04 |
| LEP | growth factor | Activated | 2.167 | 1.96E-03 |
| VEGFA | growth factor | Activated | 2.163 | 6.19E-07 |
| Ras | group | Activated | 2.156 | 2.32E-04 |
| POU5F1 | transcription regulator | Activated | 2.151 | 1.40E-04 |
| IL18 | cytokine | Activated | 2.148 | 4.42E-04 |
| PRL | cytokine | Activated | 2.138 | 3.66E-03 |
| NFKBIA | transcription regulator | Activated | 2.065 | 1.05E-09 |
| Jnk | group | Activated | 2.015 | 3.86E-11 |
| SAMSN1 | other | Activated | 2.000 | 3.23E-03 |
| S100A6 | transporter | Inhibited | -2.000 | 5.66E-05 |
| COMMD1 | transporter | Inhibited | -2.000 | 1.21E-05 |
| DUSP1 | phosphatase | Inhibited | -2.151 | 1.44E-08 |
| IRF4 | transcription regulator | Inhibited | -2.236 | 3.37E-03 |
| MEOX2 | transcription regulator | Inhibited | -2.449 | 3.69E-07 |
| COL18A1 | other | Inhibited | -2.630 | 3.48E-06 |
| IgG | complex | Inhibited | -3.051 | 1.28E-10 |
| **OKF6; 8** | NEDD9 | other | Activated | 2.449 | 6.71E-09 |
| NFkB (complex) | complex | Activated | 2.369 | 2.47E-02 |
| PDGF BB | complex | Activated | 2.347 | 4.12E-07 |
| CREB1 | transcription regulator | Activated | 2.157 | 2.19E-04 |
| IgG | complex | Inhibited | -2.000 | 3.80E-03 |
