# Supplementary material for: New signaling pathways govern the host response to C. albicans infection in various niches
Source: HighWire-hosted journal article supplement (doi:10.1101/gr.187427.114), 2015-04-09
Supplement: TableS7.docx [file TableS7.docx]

| **Table S7.** Differentially expressed mouse genes in the mouse kidney 24 hours post infection with *C. albicans* as well as the corresponding fold changes in gene expression. | | |
| --- | --- | --- |
| Values represent log (base 2) fold change of infection divided uninfected control. | | |
| "Inf" indicates that no reads were detected in the uninfected samples but the p-value criteria were met. | | |
| "-Inf" indicated that no reads were detected in the infected samples but the p-value criteria were met. | | |
|  |  |  |
| **Gene Name** | **Ensmble Gene #ID** | **Log2 fold change of infected vs uninfected** |
| RP23-476C23.4 | ENSMUSG00000097691 | Inf |
| AC138457.1 | ENSMUSG00000097683 | Inf |
| Olfr957 | ENSMUSG00000095322 | Inf |
| Gm10377 | ENSMUSG00000095226 | Inf |
| AC238811.1 | ENSMUSG00000095029 | Inf |
| Gm5416 | ENSMUSG00000094733 | Inf |
| AC158361.2 | ENSMUSG00000094512 | Inf |
| D13ERTD608E | ENSMUSG00000094027 | Inf |
| Vhl-ps1 | ENSMUSG00000092408 | Inf |
| Gm15325 | ENSMUSG00000086861 | Inf |
| Gm15199 | ENSMUSG00000086428 | Inf |
| Gm12240 | ENSMUSG00000084169 | Inf |
| Gm13214 | ENSMUSG00000083368 | Inf |
| Gm15056 | ENSMUSG00000082976 | Inf |
| Gm9062 | ENSMUSG00000081923 | Inf |
| Gm16077 | ENSMUSG00000080720 | Inf |
| Klrb1b | ENSMUSG00000079298 | Inf |
| Gzmc | ENSMUSG00000079186 | Inf |
| Ighv6-6 | ENSMUSG00000076680 | Inf |
| 9830107B12Rik | ENSMUSG00000073386 | Inf |
| Usp9y | ENSMUSG00000069044 | Inf |
| Vmn1r-ps32 | ENSMUSG00000061843 | Inf |
| Sprr2e | ENSMUSG00000055030 | Inf |
| Krt16 | ENSMUSG00000053797 | Inf |
| Etos1 | ENSMUSG00000050189 | Inf |
| Prss45 | ENSMUSG00000047257 | Inf |
| Sprr2h | ENSMUSG00000046259 | Inf |
| Aqp12 | ENSMUSG00000045091 | Inf |
| A530064D06Rik | ENSMUSG00000043939 | Inf |
| Sprr2d | ENSMUSG00000042212 | Inf |
| Lce1f | ENSMUSG00000042124 | Inf |
| Nppb | ENSMUSG00000029019 | Inf |
| Crct1 | ENSMUSG00000027913 | Inf |
| Gfi1b | ENSMUSG00000026815 | Inf |
| Ly6g | ENSMUSG00000022582 | Inf |
| 4931406B18Rik | ENSMUSG00000013353 | Inf |
| Mpo | ENSMUSG00000009350 | Inf |
| Wfdc18 | ENSMUSG00000000983 | Inf |
| RP23-58L22.3 | ENSMUSG00000097739 | -Inf |
| Ighv14-3 | ENSMUSG00000095642 | -Inf |
| AC158672.2 | ENSMUSG00000095630 | -Inf |
| AC153855.2 | ENSMUSG00000094797 | -Inf |
| Gm20654 | ENSMUSG00000093626 | -Inf |
| 1700116B05Rik | ENSMUSG00000092276 | -Inf |
| Gm14004 | ENSMUSG00000087056 | -Inf |
| 4930511F01Rik | ENSMUSG00000086504 | -Inf |
| Gm11754 | ENSMUSG00000086306 | -Inf |
| Gm12052 | ENSMUSG00000086256 | -Inf |
| Gm12658 | ENSMUSG00000084286 | -Inf |
| Gm15750 | ENSMUSG00000083921 | -Inf |
| Gm11581 | ENSMUSG00000083355 | -Inf |
| Gm9430 | ENSMUSG00000082458 | -Inf |
| Gm11922 | ENSMUSG00000082254 | -Inf |
| Gm13670 | ENSMUSG00000082187 | -Inf |
| Igkv8-24 | ENSMUSG00000076583 | -Inf |
| Igkv4-57 | ENSMUSG00000076556 | -Inf |
| Igkv1-88 | ENSMUSG00000076535 | -Inf |
| Cyp11b1 | ENSMUSG00000075604 | -Inf |
| Gm10509 | ENSMUSG00000073448 | -Inf |
| D6Ertd474e | ENSMUSG00000072679 | -Inf |
| Hist1h3a | ENSMUSG00000069265 | -Inf |
| Hmx1 | ENSMUSG00000067438 | -Inf |
| U1 | ENSMUSG00000065876 | -Inf |
| Lhfpl5 | ENSMUSG00000062252 | -Inf |
| Rnase11 | ENSMUSG00000059648 | -Inf |
| 1700007G11Rik | ENSMUSG00000057816 | -Inf |
| Gm9955 | ENSMUSG00000054745 | -Inf |
| Try4 | ENSMUSG00000054106 | -Inf |
| Isl1 | ENSMUSG00000042258 | -Inf |
| 1700021A07Rik | ENSMUSG00000037535 | -Inf |
| Tas2r108 | ENSMUSG00000037140 | -Inf |
| 1110059M19Rik | ENSMUSG00000037086 | -Inf |
| Leap2 | ENSMUSG00000036216 | -Inf |
| Sncb | ENSMUSG00000034891 | -Inf |
| Drd2 | ENSMUSG00000032259 | -Inf |
| Tbx20 | ENSMUSG00000031965 | -Inf |
| Ctrb1 | ENSMUSG00000031957 | -Inf |
| Atp4b | ENSMUSG00000031449 | -Inf |
| Actl6b | ENSMUSG00000029712 | -Inf |
| Cst8 | ENSMUSG00000027442 | -Inf |
| Lyzl1 | ENSMUSG00000024233 | -Inf |
| Tff3 | ENSMUSG00000024029 | -Inf |
| Ttc9b | ENSMUSG00000007944 | -Inf |
| Kcnh6 | ENSMUSG00000001901 | -Inf |
| Clec4e | ENSMUSG00000030142 | 10.0784 |
| Cxcl2 | ENSMUSG00000058427 | 9.38505 |
| Il1rn | ENSMUSG00000026981 | 8.37371 |
| Saa3 | ENSMUSG00000040026 | 7.99841 |
| Fgb | ENSMUSG00000033831 | 7.8177 |
| S100a8 | ENSMUSG00000056054 | 7.71924 |
| Gm4841 | ENSMUSG00000068606 | 7.71592 |
| Chi3l3 | ENSMUSG00000040809 | 7.35907 |
| S100a9 | ENSMUSG00000056071 | 7.32362 |
| Cxcl11 | ENSMUSG00000060183 | 7.30283 |
| Clec4d | ENSMUSG00000030144 | 7.29548 |
| Timp1 | ENSMUSG00000001131 | 7.27568 |
| Il1f6 | ENSMUSG00000026984 | 7.25967 |
| Mefv | ENSMUSG00000022534 | 7.21126 |
| Clec4n | ENSMUSG00000023349 | 7.14066 |
| Slfn4 | ENSMUSG00000000204 | 7.03284 |
| Fgg | ENSMUSG00000033860 | 6.98703 |
| Cxcl1 | ENSMUSG00000029380 | 6.97268 |
| BC023105 | ENSMUSG00000063388 | 6.86922 |
| Cxcl10 | ENSMUSG00000034855 | 6.78964 |
| Ubd | ENSMUSG00000035186 | 6.77819 |
| Orm2 | ENSMUSG00000061540 | 6.69454 |
| Lcn2 | ENSMUSG00000026822 | 6.68674 |
| Retnlg | ENSMUSG00000022651 | 6.61013 |
| Olr1 | ENSMUSG00000030162 | 6.59779 |
| Gbp6 | ENSMUSG00000079362 | 6.5433 |
| Hpx | ENSMUSG00000030895 | 6.52567 |
| Cyp4a14 | ENSMUSG00000028715 | 6.42252 |
| Gbp1 | ENSMUSG00000028269 | 6.41393 |
| Treml4 | ENSMUSG00000051682 | 6.36985 |
| Gbp5 | ENSMUSG00000040264 | 6.32378 |
| Gbp10 | ENSMUSG00000054588 | 6.27683 |
| 1810033B17Rik | ENSMUSG00000013974 | 6.16587 |
| F10 | ENSMUSG00000031444 | 6.13859 |
| Tnf | ENSMUSG00000024401 | 6.06085 |
| F830016B08Rik | ENSMUSG00000090942 | 5.99268 |
| Tgtp1 | ENSMUSG00000078922 | 5.90801 |
| Ccl3 | ENSMUSG00000000982 | 5.9015 |
| Il11 | ENSMUSG00000004371 | 5.8761 |
| Il1b | ENSMUSG00000027398 | 5.73953 |
| Ccl7 | ENSMUSG00000035373 | 5.6919 |
| Krt20 | ENSMUSG00000035775 | 5.65944 |
| Cd300lf | ENSMUSG00000047798 | 5.57903 |
| Gbp2 | ENSMUSG00000028270 | 5.55835 |
| Ms4a4c | ENSMUSG00000024675 | 5.47556 |
| Chi3l1 | ENSMUSG00000064246 | 5.4549 |
| Gbp11 | ENSMUSG00000092021 | 5.44831 |
| Ccl4 | ENSMUSG00000018930 | 5.43306 |
| Cxcl9 | ENSMUSG00000029417 | 5.42678 |
| Ms4a6d | ENSMUSG00000024679 | 5.4199 |
| Cxcr2 | ENSMUSG00000026180 | 5.39041 |
| Pira2 | ENSMUSG00000089942 | 5.36884 |
| Serpina3f | ENSMUSG00000066363 | 5.33497 |
| Rgs1 | ENSMUSG00000026358 | 5.31683 |
| Iigp1 | ENSMUSG00000054072 | 5.31493 |
| Itih4 | ENSMUSG00000021922 | 5.29607 |
| Lif | ENSMUSG00000034394 | 5.28108 |
| Serpine1 | ENSMUSG00000037411 | 5.27966 |
| Hmgcs2 | ENSMUSG00000027875 | 5.24273 |
| Slc7a11 | ENSMUSG00000027737 | 5.21661 |
| Atf3 | ENSMUSG00000026628 | 5.18929 |
| Gpr84 | ENSMUSG00000063234 | 5.18502 |
| Fam26f | ENSMUSG00000046031 | 5.17774 |
| Il1r2 | ENSMUSG00000026073 | 5.16317 |
| Hormad2 | ENSMUSG00000020419 | 5.13251 |
| Gbp3 | ENSMUSG00000028268 | 5.12077 |
| Oas3 | ENSMUSG00000032661 | 5.04903 |
| C3 | ENSMUSG00000024164 | 5.03741 |
| Sox9 | ENSMUSG00000000567 | 5.01167 |
| Cd14 | ENSMUSG00000051439 | 4.99139 |
| Fosl1 | ENSMUSG00000024912 | 4.98689 |
| Serpina3g | ENSMUSG00000041481 | 4.97698 |
| Osm | ENSMUSG00000058755 | 4.93454 |
| Pilra | ENSMUSG00000046245 | 4.86889 |
| B430306N03Rik | ENSMUSG00000043740 | 4.86763 |
| Cyp4f18 | ENSMUSG00000003484 | 4.86733 |
| Igtp | ENSMUSG00000078853 | 4.86678 |
| Socs3 | ENSMUSG00000053113 | 4.82255 |
| Ccl5 | ENSMUSG00000035042 | 4.78423 |
| Plek | ENSMUSG00000020120 | 4.7476 |
| Ccl2 | ENSMUSG00000035385 | 4.7121 |
| Nlrp3 | ENSMUSG00000032691 | 4.69676 |
| Fut1 | ENSMUSG00000008461 | 4.65737 |
| Slc26a9 | ENSMUSG00000042268 | 4.63525 |
| Cd177 | ENSMUSG00000052212 | 4.63132 |
| Gm5970 | ENSMUSG00000085977 | 4.60597 |
| Niacr1 | ENSMUSG00000045502 | 4.60576 |
| Ifi47 | ENSMUSG00000078920 | 4.59796 |
| Ptafr | ENSMUSG00000056529 | 4.59229 |
| Mx1 | ENSMUSG00000000386 | 4.5915 |
| Tnfrsf9 | ENSMUSG00000028965 | 4.56876 |
| Pilrb1 | ENSMUSG00000066684 | 4.54606 |
| Emr4 | ENSMUSG00000032915 | 4.53934 |
| Rnd1 | ENSMUSG00000054855 | 4.52204 |
| Egr2 | ENSMUSG00000037868 | 4.52149 |
| Serpina10 | ENSMUSG00000061947 | 4.51467 |
| Fga | ENSMUSG00000028001 | 4.49051 |
| Serpina3i | ENSMUSG00000079014 | 4.48537 |
| Saa4 | ENSMUSG00000040017 | 4.48031 |
| Hesx1 | ENSMUSG00000040726 | 4.45063 |
| Cd44 | ENSMUSG00000005087 | 4.43334 |
| Gm14548 | ENSMUSG00000074417 | 4.388 |
| Trim30c | ENSMUSG00000078616 | 4.37957 |
| Slc2a6 | ENSMUSG00000036067 | 4.36668 |
| Vcam1 | ENSMUSG00000027962 | 4.33424 |
| C5ar1 | ENSMUSG00000049130 | 4.31399 |
| Ms4a6c | ENSMUSG00000079419 | 4.30446 |
| Serpina3e-ps | ENSMUSG00000091553 | 4.30335 |
| Gm15922 | ENSMUSG00000081665 | 4.2768 |
| Tnip3 | ENSMUSG00000044162 | 4.27198 |
| Gpr141 | ENSMUSG00000053101 | 4.26874 |
| Ifitm6 | ENSMUSG00000059108 | 4.26059 |
| Ciita | ENSMUSG00000022504 | 4.25348 |
| BC094916 | ENSMUSG00000070501 | 4.20032 |
| Sox11 | ENSMUSG00000063632 | 4.19513 |
| Fos | ENSMUSG00000021250 | 4.18426 |
| Mmp25 | ENSMUSG00000023903 | 4.1716 |
| Slfn1 | ENSMUSG00000078763 | 4.1621 |
| Gm15931 | ENSMUSG00000081723 | 4.15406 |
| Il1a | ENSMUSG00000027399 | 4.14844 |
| Hck | ENSMUSG00000003283 | 4.13165 |
| Sirpb1c | ENSMUSG00000074677 | 4.12288 |
| Irgm2 | ENSMUSG00000069874 | 4.08574 |
| Tgtp2 | ENSMUSG00000078921 | 4.06854 |
| Sele | ENSMUSG00000026582 | 4.06254 |
| Irgm1 | ENSMUSG00000046879 | 4.05012 |
| Madcam1 | ENSMUSG00000020310 | 4.04765 |
| Msr1 | ENSMUSG00000025044 | 4.03614 |
| Gm4951 | ENSMUSG00000073555 | 4.03066 |
| Asprv1 | ENSMUSG00000033508 | 4.01651 |
| Lilra6 | ENSMUSG00000030427 | 3.99776 |
| Clec5a | ENSMUSG00000029915 | 3.98413 |
| Has1 | ENSMUSG00000003665 | 3.9833 |
| Gbp7 | ENSMUSG00000040253 | 3.97313 |
| Slpi | ENSMUSG00000017002 | 3.97152 |
| Csf3r | ENSMUSG00000028859 | 3.97069 |
| Gm12250 | ENSMUSG00000082292 | 3.95309 |
| Itgam | ENSMUSG00000030786 | 3.95251 |
| Serpina3h | ENSMUSG00000041449 | 3.91095 |
| Ear2 | ENSMUSG00000072596 | 3.9039 |
| Pglyrp1 | ENSMUSG00000030413 | 3.88522 |
| Samsn1 | ENSMUSG00000022876 | 3.87454 |
| Gp49a | ENSMUSG00000089672 | 3.87305 |
| Itgal | ENSMUSG00000030830 | 3.86924 |
| Apoc2 | ENSMUSG00000002992 | 3.86295 |
| Zbp1 | ENSMUSG00000027514 | 3.84039 |
| Apcs | ENSMUSG00000026542 | 3.81554 |
| Tap1 | ENSMUSG00000037321 | 3.81419 |
| Irf1 | ENSMUSG00000018899 | 3.8091 |
| Ifi205 | ENSMUSG00000054203 | 3.80375 |
| Ccl22 | ENSMUSG00000031779 | 3.79776 |
| Ncf4 | ENSMUSG00000071715 | 3.794 |
| Cd300lb | ENSMUSG00000063193 | 3.78881 |
| Mfi2 | ENSMUSG00000022780 | 3.7843 |
| Lilrb4 | ENSMUSG00000062593 | 3.78181 |
| Hk3 | ENSMUSG00000025877 | 3.77988 |
| AW112010 | ENSMUSG00000075010 | 3.77691 |
| Itgb2 | ENSMUSG00000000290 | 3.76511 |
| Rgs16 | ENSMUSG00000026475 | 3.75033 |
| AC128663.2 | ENSMUSG00000097194 | 3.74543 |
| F13a1 | ENSMUSG00000039109 | 3.7354 |
| Nr4a3 | ENSMUSG00000028341 | 3.70088 |
| Bcl2a1d | ENSMUSG00000096581 | 3.69109 |
| Dcstamp | ENSMUSG00000022303 | 3.65466 |
| Lrg1 | ENSMUSG00000037095 | 3.64306 |
| Socs1 | ENSMUSG00000038037 | 3.6242 |
| Tnfrsf1b | ENSMUSG00000028599 | 3.62222 |
| Slc16a3 | ENSMUSG00000025161 | 3.61935 |
| Ccl12 | ENSMUSG00000035352 | 3.60633 |
| Ncf1 | ENSMUSG00000015950 | 3.57969 |
| Serpinb10 | ENSMUSG00000092572 | 3.57356 |
| Ccr1 | ENSMUSG00000025804 | 3.5704 |
| Arid5a | ENSMUSG00000037447 | 3.5609 |
| Gpr132 | ENSMUSG00000021298 | 3.55905 |
| Serpina7 | ENSMUSG00000031271 | 3.55897 |
| Tlr2 | ENSMUSG00000027995 | 3.55521 |
| Gm15987 | ENSMUSG00000085786 | 3.55118 |
| Cd274 | ENSMUSG00000016496 | 3.53557 |
| Gpr35 | ENSMUSG00000026271 | 3.50914 |
| Itgax | ENSMUSG00000030789 | 3.49909 |
| Ms4a8a | ENSMUSG00000024730 | 3.49208 |
| Gbp4 | ENSMUSG00000079363 | 3.48098 |
| Pkd1l2 | ENSMUSG00000034416 | 3.47931 |
| Psmb9 | ENSMUSG00000096727 | 3.46779 |
| Clec4a3 | ENSMUSG00000043832 | 3.46377 |
| Ereg | ENSMUSG00000029377 | 3.45903 |
| Icam1 | ENSMUSG00000037405 | 3.45516 |
| Nlrc5 | ENSMUSG00000074151 | 3.44225 |
| Psmb8 | ENSMUSG00000024338 | 3.4261 |
| Ccl9 | ENSMUSG00000019122 | 3.4244 |
| Adamts4 | ENSMUSG00000006403 | 3.41673 |
| Col17a1 | ENSMUSG00000025064 | 3.41463 |
| Aqp9 | ENSMUSG00000032204 | 3.41224 |
| Treml2 | ENSMUSG00000071068 | 3.40542 |
| Ms4a6b | ENSMUSG00000024677 | 3.40487 |
| Csf2rb | ENSMUSG00000071713 | 3.40424 |
| Ccdc33 | ENSMUSG00000037716 | 3.40032 |
| Pik3r5 | ENSMUSG00000020901 | 3.39071 |
| Mdga1 | ENSMUSG00000043557 | 3.38595 |
| Pglyrp2 | ENSMUSG00000079563 | 3.37866 |
| Adam8 | ENSMUSG00000025473 | 3.37726 |
| Pyhin1 | ENSMUSG00000043263 | 3.37308 |
| Ifi202b | ENSMUSG00000026535 | 3.36637 |
| Fcrlb | ENSMUSG00000070524 | 3.36575 |
| Adora2b | ENSMUSG00000018500 | 3.35693 |
| Oasl1 | ENSMUSG00000041827 | 3.35436 |
| Sirpb1a | ENSMUSG00000095788 | 3.33481 |
| Plaur | ENSMUSG00000046223 | 3.3249 |
| Dhrs9 | ENSMUSG00000027068 | 3.31934 |
| Havcr2 | ENSMUSG00000020399 | 3.31788 |
| Fgr | ENSMUSG00000028874 | 3.31064 |
| Klra2 | ENSMUSG00000030187 | 3.29612 |
| Slc11a1 | ENSMUSG00000026177 | 3.2823 |
| Trim30b | ENSMUSG00000052749 | 3.27957 |
| Btbd17 | ENSMUSG00000000202 | 3.25981 |
| Ly6i | ENSMUSG00000022586 | 3.25578 |
| Inhbb | ENSMUSG00000037035 | 3.25565 |
| Cd69 | ENSMUSG00000030156 | 3.25369 |
| Mt2 | ENSMUSG00000031762 | 3.24918 |
| Csf2rb2 | ENSMUSG00000071714 | 3.24915 |
| Ccdc88b | ENSMUSG00000047810 | 3.24541 |
| Egr3 | ENSMUSG00000033730 | 3.22819 |
| Pdk4 | ENSMUSG00000019577 | 3.22753 |
| Serpina3n | ENSMUSG00000021091 | 3.2238 |
| Junb | ENSMUSG00000052837 | 3.22071 |
| Cd53 | ENSMUSG00000040747 | 3.21954 |
| Maff | ENSMUSG00000042622 | 3.21289 |
| Egr1 | ENSMUSG00000038418 | 3.20692 |
| Sfn | ENSMUSG00000047281 | 3.20222 |
| Havcr1 | ENSMUSG00000040405 | 3.19734 |
| Snx20 | ENSMUSG00000031662 | 3.19469 |
| Gm15448 | ENSMUSG00000074419 | 3.19265 |
| Nfkbid | ENSMUSG00000036931 | 3.18925 |
| Tnfaip3 | ENSMUSG00000019850 | 3.18835 |
| Serpinb2 | ENSMUSG00000062345 | 3.18498 |
| Lilrb3 | ENSMUSG00000058818 | 3.18412 |
| Vtcn1 | ENSMUSG00000051076 | 3.18038 |
| Il12b | ENSMUSG00000004296 | 3.16143 |
| 1100001G20Rik | ENSMUSG00000051748 | 3.15744 |
| Batf | ENSMUSG00000034266 | 3.1429 |
| Hc | ENSMUSG00000026874 | 3.13799 |
| Ltb | ENSMUSG00000024399 | 3.13686 |
| Ptgs2 | ENSMUSG00000032487 | 3.13517 |
| Sell | ENSMUSG00000026581 | 3.12347 |
| AI607873 | ENSMUSG00000073490 | 3.11273 |
| Inhba | ENSMUSG00000041324 | 3.11065 |
| Stx11 | ENSMUSG00000039232 | 3.10823 |
| Myo1g | ENSMUSG00000020437 | 3.10693 |
| Smpdl3b | ENSMUSG00000028885 | 3.10625 |
| Mlkl | ENSMUSG00000012519 | 3.08363 |
| Parp14 | ENSMUSG00000034422 | 3.08012 |
| Prrg4 | ENSMUSG00000027171 | 3.07519 |
| Dusp2 | ENSMUSG00000027368 | 3.07325 |
| Gvin1 | ENSMUSG00000045868 | 3.0703 |
| Rab44 | ENSMUSG00000064147 | 3.05798 |
| Isg15 | ENSMUSG00000035692 | 3.05158 |
| Lcp2 | ENSMUSG00000002699 | 3.04687 |
| Mmp9 | ENSMUSG00000017737 | 3.04641 |
| Pilrb2 | ENSMUSG00000066682 | 3.04579 |
| Plac8 | ENSMUSG00000029322 | 3.04274 |
| Vav1 | ENSMUSG00000034116 | 3.03664 |
| Sprr2g | ENSMUSG00000046203 | 3.03639 |
| Hp | ENSMUSG00000031722 | 3.03198 |
| Bcl3 | ENSMUSG00000053175 | 3.03147 |
| Casp4 | ENSMUSG00000033538 | 3.02393 |
| Clec12a | ENSMUSG00000053063 | 3.02329 |
| BC021614 | ENSMUSG00000058216 | 3.0183 |
| Ch25h | ENSMUSG00000050370 | 3.00502 |
| Selp | ENSMUSG00000026580 | 2.99964 |
| Gm4070 | ENSMUSG00000078606 | 2.99447 |
| Ankrd1 | ENSMUSG00000024803 | 2.99008 |
| Cybb | ENSMUSG00000015340 | 2.97136 |
| Myo1f | ENSMUSG00000024300 | 2.96642 |
| Glipr2 | ENSMUSG00000028480 | 2.94752 |
| Dusp5 | ENSMUSG00000034765 | 2.94028 |
| Gm5431 | ENSMUSG00000058163 | 2.93574 |
| Cd84 | ENSMUSG00000038147 | 2.93236 |
| Fcer1g | ENSMUSG00000058715 | 2.92127 |
| Fut2 | ENSMUSG00000055978 | 2.90073 |
| Tmem173 | ENSMUSG00000024349 | 2.89998 |
| Trib3 | ENSMUSG00000032715 | 2.8987 |
| Tnfrsf12a | ENSMUSG00000023905 | 2.88758 |
| Clec4a1 | ENSMUSG00000049037 | 2.8853 |
| Neurl3 | ENSMUSG00000047180 | 2.88045 |
| F630028O10Rik | ENSMUSG00000078122 | 2.87826 |
| Wfdc17 | ENSMUSG00000069792 | 2.87456 |
| Lyz2 | ENSMUSG00000069516 | 2.86929 |
| Cyp4a10 | ENSMUSG00000066072 | 2.86536 |
| Slc10a6 | ENSMUSG00000029321 | 2.85706 |
| Nfam1 | ENSMUSG00000058099 | 2.84444 |
| Stat1 | ENSMUSG00000026104 | 2.84166 |
| Cebpd | ENSMUSG00000071637 | 2.82257 |
| Foxj1 | ENSMUSG00000034227 | 2.8093 |
| Pik3ap1 | ENSMUSG00000025017 | 2.8027 |
| Slc15a3 | ENSMUSG00000024737 | 2.80046 |
| Cd52 | ENSMUSG00000000682 | 2.79741 |
| Tlr13 | ENSMUSG00000033777 | 2.79676 |
| Nfe2 | ENSMUSG00000058794 | 2.78758 |
| Mpeg1 | ENSMUSG00000046805 | 2.7858 |
| Sprr2f | ENSMUSG00000050635 | 2.77426 |
| Alox5ap | ENSMUSG00000060063 | 2.75038 |
| Trpv6 | ENSMUSG00000029868 | 2.7493 |
| Cyp4a32 | ENSMUSG00000063929 | 2.73352 |
| Col6a4 | ENSMUSG00000032572 | 2.7277 |
| D17H6S56E-5 | ENSMUSG00000091747 | 2.72186 |
| Osmr | ENSMUSG00000022146 | 2.71867 |
| 1200007C13Rik | ENSMUSG00000087684 | 2.7105 |
| Lrrc25 | ENSMUSG00000049988 | 2.70454 |
| Fhad1 | ENSMUSG00000051435 | 2.69211 |
| Lbp | ENSMUSG00000016024 | 2.68742 |
| Gm15611 | ENSMUSG00000084923 | 2.68465 |
| Angptl4 | ENSMUSG00000002289 | 2.67614 |
| Gm14005 | ENSMUSG00000074813 | 2.67129 |
| Dusp8 | ENSMUSG00000037887 | 2.66862 |
| Htr7 | ENSMUSG00000024798 | 2.66828 |
| Chac1 | ENSMUSG00000027313 | 2.66019 |
| Boll | ENSMUSG00000025977 | 2.6499 |
| Ifit1 | ENSMUSG00000034459 | 2.64557 |
| Tap2 | ENSMUSG00000024339 | 2.64555 |
| AC125373.1 | ENSMUSG00000097804 | 2.64149 |
| Serpina3m | ENSMUSG00000079012 | 2.63461 |
| Clec7a | ENSMUSG00000079293 | 2.63306 |
| Oas2 | ENSMUSG00000032690 | 2.6302 |
| Phf11 | ENSMUSG00000044703 | 2.62488 |
| Slfn2 | ENSMUSG00000072620 | 2.61939 |
| Dnase1l3 | ENSMUSG00000025279 | 2.60565 |
| Ffar2 | ENSMUSG00000051314 | 2.60485 |
| Relb | ENSMUSG00000002983 | 2.60366 |
| Arg2 | ENSMUSG00000021125 | 2.59872 |
| Psors1c2 | ENSMUSG00000024409 | 2.59409 |
| Mx2 | ENSMUSG00000023341 | 2.58468 |
| Psmb10 | ENSMUSG00000031897 | 2.57983 |
| Gpr88 | ENSMUSG00000068696 | 2.56344 |
| Gm8909 | ENSMUSG00000073402 | 2.54925 |
| Slc20a1 | ENSMUSG00000027397 | 2.54512 |
| Cp | ENSMUSG00000003617 | 2.53511 |
| Tyrobp | ENSMUSG00000030579 | 2.53476 |
| Nos2 | ENSMUSG00000020826 | 2.53097 |
| Xdh | ENSMUSG00000024066 | 2.53055 |
| AB124611 | ENSMUSG00000057191 | 2.52773 |
| Cd68 | ENSMUSG00000018774 | 2.52592 |
| Trim6 | ENSMUSG00000072244 | 2.51307 |
| Lst1 | ENSMUSG00000073412 | 2.50303 |
| AI504432 | ENSMUSG00000056145 | 2.49874 |
| Sfpi1 | ENSMUSG00000002111 | 2.49737 |
| H2-Q5 | ENSMUSG00000055413 | 2.49727 |
| Lair1 | ENSMUSG00000055541 | 2.49618 |
| Art2a-ps | ENSMUSG00000092517 | 2.49546 |
| Clec4a2 | ENSMUSG00000030148 | 2.48734 |
| Siglece | ENSMUSG00000030474 | 2.47159 |
| Sectm1a | ENSMUSG00000025165 | 2.46732 |
| Gm8127 | ENSMUSG00000090713 | 2.46638 |
| Nfkbiz | ENSMUSG00000035356 | 2.46081 |
| Klf6 | ENSMUSG00000000078 | 2.45726 |
| Birc3 | ENSMUSG00000032000 | 2.44857 |
| Gad1-ps | ENSMUSG00000090665 | 2.44213 |
| Gzmb | ENSMUSG00000015437 | 2.43833 |
| Bpifc | ENSMUSG00000050108 | 2.43541 |
| Ccno | ENSMUSG00000042417 | 2.43453 |
| Sertad4 | ENSMUSG00000016262 | 2.42227 |
| Gm15895 | ENSMUSG00000085068 | 2.42029 |
| Clca2 | ENSMUSG00000028262 | 2.41752 |
| Il18rap | ENSMUSG00000026068 | 2.41432 |
| Tmem252 | ENSMUSG00000048572 | 2.40177 |
| Nrg1 | ENSMUSG00000062991 | 2.39038 |
| Rasd1 | ENSMUSG00000049892 | 2.38893 |
| Hrk | ENSMUSG00000046607 | 2.38835 |
| AI662270 | ENSMUSG00000087107 | 2.38338 |
| Tgfbi | ENSMUSG00000035493 | 2.37916 |
| Slc34a2 | ENSMUSG00000029188 | 2.37067 |
| Ppm1j | ENSMUSG00000002228 | 2.36467 |
| Tnfaip6 | ENSMUSG00000053475 | 2.3632 |
| Fosb | ENSMUSG00000003545 | 2.36102 |
| Csrnp1 | ENSMUSG00000032515 | 2.36014 |
| Btg2 | ENSMUSG00000020423 | 2.35988 |
| Zbtb16 | ENSMUSG00000066687 | 2.35813 |
| Slfn8 | ENSMUSG00000035208 | 2.34891 |
| H2-Q1 | ENSMUSG00000079507 | 2.34673 |
| Gabrp | ENSMUSG00000020159 | 2.34218 |
| Gadd45b | ENSMUSG00000015312 | 2.33875 |
| Rac2 | ENSMUSG00000033220 | 2.3254 |
| Cd40 | ENSMUSG00000017652 | 2.31832 |
| Gm8995 | ENSMUSG00000063286 | 2.29408 |
| Coro1a | ENSMUSG00000030707 | 2.29205 |
| Gm9817 | ENSMUSG00000047061 | 2.29173 |
| Pcsk2 | ENSMUSG00000027419 | 2.29026 |
| Gdf15 | ENSMUSG00000038508 | 2.28849 |
| Gm9025 | ENSMUSG00000082433 | 2.28848 |
| Efhd2 | ENSMUSG00000040659 | 2.28824 |
| Apol9a | ENSMUSG00000068246 | 2.28533 |
| Rhob | ENSMUSG00000054364 | 2.28306 |
| Lpcat2 | ENSMUSG00000033192 | 2.28241 |
| Arl5c | ENSMUSG00000038352 | 2.28082 |
| Myc | ENSMUSG00000022346 | 2.2784 |
| Ifi204 | ENSMUSG00000073489 | 2.2778 |
| Runx1 | ENSMUSG00000022952 | 2.25893 |
| Apobr | ENSMUSG00000042759 | 2.25857 |
| H2-DMb2 | ENSMUSG00000037548 | 2.2499 |
| Nfkb2 | ENSMUSG00000025225 | 2.24377 |
| Gch1 | ENSMUSG00000037580 | 2.23433 |
| Csf1 | ENSMUSG00000014599 | 2.22945 |
| Ube2l6 | ENSMUSG00000027078 | 2.22487 |
| Rrad | ENSMUSG00000031880 | 2.22315 |
| Cd86 | ENSMUSG00000022901 | 2.22087 |
| Snx10 | ENSMUSG00000038301 | 2.21729 |
| Plin2 | ENSMUSG00000028494 | 2.21574 |
| H2-DMa | ENSMUSG00000037649 | 2.21218 |
| Pdgfb | ENSMUSG00000000489 | 2.20975 |
| Fabp1 | ENSMUSG00000054422 | 2.20474 |
| Syk | ENSMUSG00000021457 | 2.20415 |
| Ccl8 | ENSMUSG00000009185 | 2.19916 |
| C1s | ENSMUSG00000038521 | 2.18984 |
| Mall | ENSMUSG00000027377 | 2.1887 |
| Soat2 | ENSMUSG00000023045 | 2.18661 |
| Ccr7 | ENSMUSG00000037944 | 2.18651 |
| Ccr5 | ENSMUSG00000079227 | 2.18609 |
| Aldh1a2 | ENSMUSG00000013584 | 2.18253 |
| 1700024P16Rik | ENSMUSG00000078612 | 2.17801 |
| Themis2 | ENSMUSG00000037731 | 2.17432 |
| Herc6 | ENSMUSG00000029798 | 2.16657 |
| Il21r | ENSMUSG00000030745 | 2.16571 |
| F7 | ENSMUSG00000031443 | 2.16404 |
| Oas1a | ENSMUSG00000052776 | 2.16334 |
| Il2rg | ENSMUSG00000031304 | 2.16108 |
| Il34 | ENSMUSG00000031750 | 2.16075 |
| Hcls1 | ENSMUSG00000022831 | 2.1597 |
| Chrdl2 | ENSMUSG00000030732 | 2.15907 |
| Cd300ld | ENSMUSG00000034641 | 2.15899 |
| AF251705 | ENSMUSG00000044811 | 2.15577 |
| Apol10b | ENSMUSG00000050014 | 2.15537 |
| Btk | ENSMUSG00000031264 | 2.15208 |
| Apbb1ip | ENSMUSG00000026786 | 2.15124 |
| Ptprc | ENSMUSG00000026395 | 2.15011 |
| Cldn4 | ENSMUSG00000047501 | 2.14236 |
| Rel | ENSMUSG00000020275 | 2.14198 |
| Was | ENSMUSG00000031165 | 2.13928 |
| C4b | ENSMUSG00000073418 | 2.13708 |
| Eif4ebp3 | ENSMUSG00000090264 | 2.12196 |
| Usp18 | ENSMUSG00000030107 | 2.11897 |
| Ncf2 | ENSMUSG00000026480 | 2.11889 |
| Cebpb | ENSMUSG00000056501 | 2.11729 |
| Ly9 | ENSMUSG00000004707 | 2.11081 |
| Plk3 | ENSMUSG00000028680 | 2.11061 |
| Sbno2 | ENSMUSG00000035673 | 2.10806 |
| Nfkbie | ENSMUSG00000023947 | 2.10595 |
| Slamf8 | ENSMUSG00000053318 | 2.10551 |
| Hmox1 | ENSMUSG00000005413 | 2.10475 |
| Cd300a | ENSMUSG00000034652 | 2.09997 |
| AA467197 | ENSMUSG00000033213 | 2.09793 |
| Marcksl1 | ENSMUSG00000047945 | 2.09697 |
| Piwil2 | ENSMUSG00000033644 | 2.09444 |
| Ctsc | ENSMUSG00000030560 | 2.09352 |
| Spn | ENSMUSG00000051457 | 2.08874 |
| Sec1 | ENSMUSG00000040364 | 2.08733 |
| Creb5 | ENSMUSG00000053007 | 2.08667 |
| Ms4a4d | ENSMUSG00000024678 | 2.08495 |
| Mthfd2 | ENSMUSG00000005667 | 2.0808 |
| Arhgap30 | ENSMUSG00000048865 | 2.07998 |
| Nfkbia | ENSMUSG00000021025 | 2.07754 |
| Hpse | ENSMUSG00000035273 | 2.07205 |
| Trpm2 | ENSMUSG00000009292 | 2.06842 |
| Gjb3 | ENSMUSG00000042367 | 2.06737 |
| Rasgrp4 | ENSMUSG00000030589 | 2.0649 |
| S100a4 | ENSMUSG00000001020 | 2.0649 |
| Krt14 | ENSMUSG00000045545 | 2.06063 |
| Irf7 | ENSMUSG00000025498 | 2.06046 |
| Fgl2 | ENSMUSG00000039899 | 2.05801 |
| Cdkn1a | ENSMUSG00000023067 | 2.05773 |
| Ctss | ENSMUSG00000038642 | 2.05609 |
| Gm13398 | ENSMUSG00000087364 | 2.05425 |
| Jun | ENSMUSG00000052684 | 2.05067 |
| Map3k6 | ENSMUSG00000028862 | 2.04547 |
| Tifab | ENSMUSG00000049625 | 2.04022 |
| Sp140 | ENSMUSG00000070031 | 2.03842 |
| AC167222.1 | ENSMUSG00000097766 | 2.03543 |
| Bst2 | ENSMUSG00000046718 | 2.02845 |
| Spib | ENSMUSG00000008193 | 2.02696 |
| Tapbpl | ENSMUSG00000038213 | 2.02533 |
| Hal | ENSMUSG00000020017 | 2.02497 |
| H2-Q4 | ENSMUSG00000035929 | 2.02488 |
| Spic | ENSMUSG00000004359 | 2.02221 |
| Fcgr1 | ENSMUSG00000015947 | 2.01893 |
| Hsp25-ps1 | ENSMUSG00000078915 | 2.01619 |
| Gpr123 | ENSMUSG00000025475 | 2.0081 |
| 7SK | ENSMUSG00000065037 | 1.99978 |
| Sphk1 | ENSMUSG00000061878 | 1.99974 |
| Psd4 | ENSMUSG00000026979 | 1.9946 |
| Prr15 | ENSMUSG00000045725 | 1.99312 |
| Ccrl2 | ENSMUSG00000043953 | 1.98411 |
| Sash3 | ENSMUSG00000031101 | 1.98133 |
| Relt | ENSMUSG00000008318 | 1.98127 |
| Oasl2 | ENSMUSG00000029561 | 1.97366 |
| Amica1 | ENSMUSG00000048534 | 1.97318 |
| Tgm1 | ENSMUSG00000022218 | 1.97033 |
| Ccl6 | ENSMUSG00000018927 | 1.96432 |
| Cyp2b10 | ENSMUSG00000030483 | 1.94573 |
| Smox | ENSMUSG00000027333 | 1.9433 |
| Atp8b4 | ENSMUSG00000060131 | 1.94159 |
| Hspb1 | ENSMUSG00000004951 | 1.94109 |
| Clcf1 | ENSMUSG00000040663 | 1.94001 |
| Ctrl | ENSMUSG00000031896 | 1.93408 |
| Rps2-ps13 | ENSMUSG00000081684 | 1.93025 |
| Lhfpl2 | ENSMUSG00000045312 | 1.92722 |
| Fosl2 | ENSMUSG00000029135 | 1.92395 |
| Gzma | ENSMUSG00000023132 | 1.923 |
| Gm6614 | ENSMUSG00000079263 | 1.91967 |
| Gm9732 | ENSMUSG00000090440 | 1.91606 |
| Ikbke | ENSMUSG00000042349 | 1.90309 |
| Rhoh | ENSMUSG00000029204 | 1.89563 |
| Selplg | ENSMUSG00000048163 | 1.88762 |
| Tsc22d1 | ENSMUSG00000022010 | 1.88571 |
| Rtp4 | ENSMUSG00000033355 | 1.88373 |
| Edn1 | ENSMUSG00000021367 | 1.88209 |
| Ier3 | ENSMUSG00000003541 | 1.87903 |
| Naip6 | ENSMUSG00000078942 | 1.87702 |
| Aif1 | ENSMUSG00000024397 | 1.87393 |
| H2-Q6 | ENSMUSG00000073409 | 1.87058 |
| Ccr2 | ENSMUSG00000049103 | 1.86819 |
| Calml3 | ENSMUSG00000063130 | 1.86655 |
| Gbp9 | ENSMUSG00000029298 | 1.86605 |
| Ptpn7 | ENSMUSG00000031506 | 1.85916 |
| Pnrc1 | ENSMUSG00000040128 | 1.85777 |
| Tlr7 | ENSMUSG00000044583 | 1.85558 |
| 1300002K09Rik | ENSMUSG00000028327 | 1.84501 |
| Bhlhe40 | ENSMUSG00000030103 | 1.84378 |
| Traf1 | ENSMUSG00000026875 | 1.84125 |
| Mycl1 | ENSMUSG00000028654 | 1.84116 |
| Acat3 | ENSMUSG00000062480 | 1.84099 |
| Il10ra | ENSMUSG00000032089 | 1.83672 |
| Nckap1l | ENSMUSG00000022488 | 1.83387 |
| Tpbg | ENSMUSG00000035274 | 1.83226 |
| Gucy1b2 | ENSMUSG00000021933 | 1.82595 |
| Pvr | ENSMUSG00000040511 | 1.82409 |
| Aim1l | ENSMUSG00000012123 | 1.8183 |
| Fgd3 | ENSMUSG00000037946 | 1.81727 |
| AC123702.1 | ENSMUSG00000097636 | 1.81564 |
| Ier5 | ENSMUSG00000056708 | 1.81371 |
| Acot1 | ENSMUSG00000072949 | 1.81281 |
| S1pr5 | ENSMUSG00000045087 | 1.81228 |
| Stat3 | ENSMUSG00000004040 | 1.81184 |
| Samd5 | ENSMUSG00000060487 | 1.80986 |
| Gsdmd | ENSMUSG00000022575 | 1.80923 |
| Pgbd5 | ENSMUSG00000050751 | 1.80501 |
| Casp1 | ENSMUSG00000025888 | 1.80014 |
| Ccl11 | ENSMUSG00000020676 | 1.79642 |
| Oas1g | ENSMUSG00000066861 | 1.7957 |
| Sycp2 | ENSMUSG00000060445 | 1.79508 |
| Parp9 | ENSMUSG00000022906 | 1.79305 |
| Clu | ENSMUSG00000022037 | 1.79291 |
| Ccl24 | ENSMUSG00000004814 | 1.78808 |
| Tgif1 | ENSMUSG00000047407 | 1.78785 |
| Cyr61 | ENSMUSG00000028195 | 1.78676 |
| Gm20645 | ENSMUSG00000093470 | 1.78415 |
| Map3k8 | ENSMUSG00000024235 | 1.78104 |
| Abcc3 | ENSMUSG00000020865 | 1.77543 |
| Arg1 | ENSMUSG00000019987 | 1.76933 |
| Rnf223 | ENSMUSG00000073672 | 1.76389 |
| Tmem40 | ENSMUSG00000059900 | 1.75892 |
| Tmem37 | ENSMUSG00000050777 | 1.75307 |
| Tnfrsf23 | ENSMUSG00000037613 | 1.74912 |
| Lsp1 | ENSMUSG00000018819 | 1.74631 |
| H2-K1 | ENSMUSG00000061232 | 1.74562 |
| C330006D17Rik | ENSMUSG00000049742 | 1.74088 |
| Cyp24a1 | ENSMUSG00000038567 | 1.73736 |
| 9930013L23Rik | ENSMUSG00000052353 | 1.73068 |
| 1700034O15Rik | ENSMUSG00000029867 | 1.72866 |
| Zfp36l1 | ENSMUSG00000021127 | 1.71791 |
| Tubb2a | ENSMUSG00000058672 | 1.71767 |
| AC153382.1 | ENSMUSG00000097134 | 1.71691 |
| Il2ra | ENSMUSG00000026770 | 1.71146 |
| Klf10 | ENSMUSG00000037465 | 1.70978 |
| H28 | ENSMUSG00000039146 | 1.70958 |
| Il2rb | ENSMUSG00000068227 | 1.70907 |
| Plekho2 | ENSMUSG00000050721 | 1.70758 |
| Mcoln2 | ENSMUSG00000011008 | 1.70028 |
| Nt5c1a | ENSMUSG00000054958 | 1.69666 |
| F3 | ENSMUSG00000028128 | 1.69288 |
| Dtx3l | ENSMUSG00000049502 | 1.68949 |
| Il23a | ENSMUSG00000025383 | 1.68079 |
| Apol9b | ENSMUSG00000057346 | 1.6745 |
| Cyp27b1 | ENSMUSG00000006724 | 1.67432 |
| 2200002D01Rik | ENSMUSG00000030587 | 1.67237 |
| Mvp | ENSMUSG00000030681 | 1.67175 |
| Gm16096 | ENSMUSG00000087135 | 1.67074 |
| Fam124a | ENSMUSG00000035184 | 1.67037 |
| Cyp17a1 | ENSMUSG00000003555 | 1.6671 |
| Rnf125 | ENSMUSG00000033107 | 1.66611 |
| Dock2 | ENSMUSG00000020143 | 1.65809 |
| Nek6 | ENSMUSG00000026749 | 1.65808 |
| Arsi | ENSMUSG00000036412 | 1.65771 |
| Runx3 | ENSMUSG00000070691 | 1.65483 |
| Ifit2 | ENSMUSG00000045932 | 1.6505 |
| Rhbdf2 | ENSMUSG00000020806 | 1.65033 |
| Gimap8 | ENSMUSG00000064262 | 1.64983 |
| Asns | ENSMUSG00000029752 | 1.64894 |
| Timd4 | ENSMUSG00000055546 | 1.64844 |
| Ly6g6e | ENSMUSG00000013766 | 1.64603 |
| Arl11 | ENSMUSG00000043157 | 1.64586 |
| Il20rb | ENSMUSG00000044244 | 1.64427 |
| Ivl | ENSMUSG00000049128 | 1.63914 |
| 1810063I02Rik | ENSMUSG00000085551 | 1.63828 |
| Lcp1 | ENSMUSG00000021998 | 1.63617 |
| Fcgr3 | ENSMUSG00000059498 | 1.63253 |
| Xaf1 | ENSMUSG00000040483 | 1.62733 |
| Enc1 | ENSMUSG00000041773 | 1.62668 |
| Clec2d | ENSMUSG00000030157 | 1.6231 |
| Mt1 | ENSMUSG00000031765 | 1.61578 |
| Akap12 | ENSMUSG00000038587 | 1.61484 |
| H2-Ab1 | ENSMUSG00000073421 | 1.60666 |
| Syt2 | ENSMUSG00000026452 | 1.60438 |
| 9930023K05Rik | ENSMUSG00000035818 | 1.60416 |
| Akr1b8 | ENSMUSG00000029762 | 1.60129 |
| Gnat1 | ENSMUSG00000034837 | 1.5999 |
| Hpcal4 | ENSMUSG00000046093 | 1.59136 |
| Bmper | ENSMUSG00000031963 | 1.58962 |
| Zfp36 | ENSMUSG00000044786 | 1.58913 |
| Sh2d4b | ENSMUSG00000037833 | 1.58836 |
| Il6ra | ENSMUSG00000027947 | 1.58705 |
| Hmga1 | ENSMUSG00000046711 | 1.58699 |
| Vnn1 | ENSMUSG00000037440 | 1.58481 |
| Bdkrb2 | ENSMUSG00000021070 | 1.58359 |
| Mybpc2 | ENSMUSG00000038670 | 1.58313 |
| Rela | ENSMUSG00000024927 | 1.58309 |
| Trpv2 | ENSMUSG00000018507 | 1.57938 |
| Casp12 | ENSMUSG00000025887 | 1.57519 |
| Trex1 | ENSMUSG00000049734 | 1.57428 |
| Tmem158 | ENSMUSG00000054871 | 1.5742 |
| Nr4a1 | ENSMUSG00000023034 | 1.57111 |
| Klrk1 | ENSMUSG00000030149 | 1.5655 |
| Laptm5 | ENSMUSG00000028581 | 1.56482 |
| Il7r | ENSMUSG00000003882 | 1.56381 |
| Scimp | ENSMUSG00000057135 | 1.56112 |
| Ucp2 | ENSMUSG00000033685 | 1.56072 |
| Bbc3 | ENSMUSG00000002083 | 1.55972 |
| Fgf18 | ENSMUSG00000057967 | 1.55921 |
| Gc | ENSMUSG00000035540 | 1.55913 |
| B3gnt5 | ENSMUSG00000022686 | 1.5565 |
| Gadd45g | ENSMUSG00000021453 | 1.55618 |
| Aldh1a7 | ENSMUSG00000024747 | 1.55616 |
| Gpr64 | ENSMUSG00000031298 | 1.55599 |
| H2-Q7 | ENSMUSG00000060550 | 1.55498 |
| Gpnmb | ENSMUSG00000029816 | 1.5546 |
| Rsad2 | ENSMUSG00000020641 | 1.5543 |
| C1ra | ENSMUSG00000055172 | 1.55291 |
| Ifit3 | ENSMUSG00000074896 | 1.55141 |
| Ccdc21 | ENSMUSG00000037443 | 1.54085 |
| Samhd1 | ENSMUSG00000027639 | 1.54073 |
| Gm10499 | ENSMUSG00000073403 | 1.53081 |
| Hmga1-rs1 | ENSMUSG00000078249 | 1.5264 |
| Apobec1 | ENSMUSG00000040613 | 1.52536 |
| S100a10 | ENSMUSG00000041959 | 1.51832 |
| Cd33 | ENSMUSG00000004609 | 1.50675 |
| Acot5 | ENSMUSG00000042540 | 1.50631 |
| Rcan1 | ENSMUSG00000022951 | 1.50413 |
| Ankrd55 | ENSMUSG00000049985 | 1.50358 |
| Serpinb9 | ENSMUSG00000045827 | 1.50014 |
| Ctps | ENSMUSG00000028633 | 1.49874 |
| Thbs4 | ENSMUSG00000021702 | 1.49849 |
| Aldh1a1 | ENSMUSG00000053279 | 1.49737 |
| Naip5 | ENSMUSG00000071203 | 1.49683 |
| Gm10032 | ENSMUSG00000057913 | 1.49508 |
| Apol6 | ENSMUSG00000033576 | 1.49248 |
| Gm8126 | ENSMUSG00000090634 | 1.49028 |
| Id3 | ENSMUSG00000007872 | 1.48653 |
| Sla | ENSMUSG00000022372 | 1.48541 |
| H2-K2 | ENSMUSG00000067203 | 1.48515 |
| Arhgap9 | ENSMUSG00000040345 | 1.4842 |
| Srgn | ENSMUSG00000020077 | 1.47974 |
| Tlr1 | ENSMUSG00000044827 | 1.4717 |
| Slc7a2 | ENSMUSG00000031596 | 1.47141 |
| Cmpk2 | ENSMUSG00000020638 | 1.47096 |
| 2410006H16Rik | ENSMUSG00000086841 | 1.46952 |
| Id1 | ENSMUSG00000042745 | 1.46939 |
| Nfkb1 | ENSMUSG00000028163 | 1.46875 |
| Hdc | ENSMUSG00000027360 | 1.46794 |
| Il18bp | ENSMUSG00000070427 | 1.46723 |
| Gpr65 | ENSMUSG00000021886 | 1.46705 |
| Pdpn | ENSMUSG00000028583 | 1.46662 |
| Igf2bp2 | ENSMUSG00000033581 | 1.45819 |
| 5031414D18Rik | ENSMUSG00000034959 | 1.45774 |
| Itga2 | ENSMUSG00000015533 | 1.45712 |
| Ptrh1 | ENSMUSG00000053746 | 1.45584 |
| Tapbp | ENSMUSG00000024308 | 1.45206 |
| Slfn10-ps | ENSMUSG00000072621 | 1.44957 |
| Rnf122 | ENSMUSG00000039328 | 1.44912 |
| Sema7a | ENSMUSG00000038264 | 1.44598 |
| Ceacam3 | ENSMUSG00000053228 | 1.44315 |
| Bcl6 | ENSMUSG00000022508 | 1.43313 |
| Ifitm3 | ENSMUSG00000025492 | 1.4314 |
| Slfn9 | ENSMUSG00000069793 | 1.43108 |
| Slc13a1 | ENSMUSG00000029700 | 1.4306 |
| Pea15a | ENSMUSG00000013698 | 1.42981 |
| Ephb6 | ENSMUSG00000029869 | 1.42917 |
| Serpinb1a | ENSMUSG00000044734 | 1.42844 |
| Litaf | ENSMUSG00000022500 | 1.42678 |
| Gm9847 | ENSMUSG00000050974 | 1.42496 |
| Tmsb10 | ENSMUSG00000079523 | 1.42455 |
| Ier2 | ENSMUSG00000053560 | 1.41993 |
| Rtn4rl2 | ENSMUSG00000050896 | 1.41954 |
| Cd48 | ENSMUSG00000015355 | 1.41918 |
| Il18r1 | ENSMUSG00000026070 | 1.41326 |
| Serpina3c | ENSMUSG00000066361 | 1.40905 |
| Pfkfb3 | ENSMUSG00000026773 | 1.40496 |
| Ifi44 | ENSMUSG00000028037 | 1.40282 |
| Ctsw | ENSMUSG00000024910 | 1.40088 |
| Trib1 | ENSMUSG00000032501 | 1.40068 |
| Gm9844 | ENSMUSG00000050347 | 1.39663 |
| Klhl25 | ENSMUSG00000055652 | 1.39649 |
| Elf3 | ENSMUSG00000003051 | 1.39628 |
| Capg | ENSMUSG00000056737 | 1.39446 |
| Lat2 | ENSMUSG00000040751 | 1.3943 |
| H2-D1 | ENSMUSG00000073411 | 1.39281 |
| Fas | ENSMUSG00000024778 | 1.39098 |
| Tmem140 | ENSMUSG00000057137 | 1.39007 |
| Ifrd1 | ENSMUSG00000001627 | 1.38903 |
| Cldn14 | ENSMUSG00000047109 | 1.38814 |
| Lonrf3 | ENSMUSG00000016239 | 1.38602 |
| Acnat1 | ENSMUSG00000070985 | 1.38478 |
| Gm11127 | ENSMUSG00000079492 | 1.37968 |
| Actn1 | ENSMUSG00000015143 | 1.37902 |
| Hist2h4 | ENSMUSG00000091405 | 1.37901 |
| Slc25a25 | ENSMUSG00000026819 | 1.37825 |
| Rell1 | ENSMUSG00000047881 | 1.37639 |
| AC116801.1 | ENSMUSG00000097534 | 1.37291 |
| Ripk2 | ENSMUSG00000041135 | 1.37239 |
| Cyth4 | ENSMUSG00000018008 | 1.37148 |
| Gabrr2 | ENSMUSG00000023267 | 1.3693 |
| Abcb1b | ENSMUSG00000028970 | 1.36633 |
| H2-Q2 | ENSMUSG00000091705 | 1.36558 |
| H2-M3 | ENSMUSG00000016206 | 1.36547 |
| Dapp1 | ENSMUSG00000028159 | 1.36391 |
| Oas1b | ENSMUSG00000029605 | 1.36293 |
| Pou2f2 | ENSMUSG00000008496 | 1.35783 |
| Lat | ENSMUSG00000030742 | 1.35675 |
| Klk1b9 | ENSMUSG00000059042 | 1.35347 |
| Pxdc1 | ENSMUSG00000021411 | 1.35346 |
| A4galt | ENSMUSG00000047878 | 1.3489 |
| Stat2 | ENSMUSG00000040033 | 1.3489 |
| Oit1 | ENSMUSG00000021749 | 1.34808 |
| Gm12725 | ENSMUSG00000081189 | 1.34502 |
| Sctr | ENSMUSG00000026387 | 1.34423 |
| Irf9 | ENSMUSG00000002325 | 1.34404 |
| Isg20 | ENSMUSG00000039236 | 1.34076 |
| Pim1 | ENSMUSG00000024014 | 1.34041 |
| B2m | ENSMUSG00000060802 | 1.33647 |
| Socs2 | ENSMUSG00000020027 | 1.33627 |
| Ptpre | ENSMUSG00000041836 | 1.33523 |
| Serpinb6b | ENSMUSG00000042842 | 1.33403 |
| Il33 | ENSMUSG00000024810 | 1.33345 |
| Dcdc2a | ENSMUSG00000035910 | 1.3308 |
| Tnfaip8l3 | ENSMUSG00000074345 | 1.33054 |
| Itga5 | ENSMUSG00000000555 | 1.32836 |
| Tagln2 | ENSMUSG00000026547 | 1.32507 |
| Pld4 | ENSMUSG00000052160 | 1.32339 |
| Wnt10a | ENSMUSG00000026167 | 1.32307 |
| Impdh2 | ENSMUSG00000062867 | 1.32229 |
| Tnfrsf14 | ENSMUSG00000042333 | 1.322 |
| 5730559C18Rik | ENSMUSG00000041605 | 1.32077 |
| Actg-ps1 | ENSMUSG00000074978 | 1.31865 |
| 4930539E08Rik | ENSMUSG00000048905 | 1.31696 |
| Rnf213 | ENSMUSG00000070327 | 1.31607 |
| Gadd45a | ENSMUSG00000036390 | 1.31352 |
| Ccrn4l | ENSMUSG00000023087 | 1.31263 |
| 2010003K11Rik | ENSMUSG00000042041 | 1.31059 |
| Isoc2b | ENSMUSG00000052605 | 1.30867 |
| Spink6 | ENSMUSG00000055095 | 1.30712 |
| H2-DMb1 | ENSMUSG00000079547 | 1.3047 |
| Gjb4 | ENSMUSG00000046623 | 1.30463 |
| B4galnt1 | ENSMUSG00000006731 | 1.30419 |
| Pstpip1 | ENSMUSG00000032322 | 1.30343 |
| Gm15264 | ENSMUSG00000081355 | 1.29992 |
| Nuak2 | ENSMUSG00000009772 | 1.29867 |
| Tmcc3 | ENSMUSG00000020023 | 1.29804 |
| Ccdc120 | ENSMUSG00000031150 | 1.29603 |
| Galnt6 | ENSMUSG00000037280 | 1.29507 |
| Pla2g7 | ENSMUSG00000023913 | 1.29309 |
| Psme2b-ps | ENSMUSG00000078153 | 1.29233 |
| Arrdc4 | ENSMUSG00000042659 | 1.29048 |
| Cd24a | ENSMUSG00000047139 | 1.29038 |
| Itga4 | ENSMUSG00000027009 | 1.29037 |
| Apod | ENSMUSG00000022548 | 1.28653 |
| Ptpla | ENSMUSG00000063275 | 1.28325 |
| Sdc1 | ENSMUSG00000020592 | 1.2827 |
| Ms4a4b | ENSMUSG00000056290 | 1.28216 |
| Fcgr4 | ENSMUSG00000059089 | 1.27292 |
| Mboat1 | ENSMUSG00000038732 | 1.27279 |
| Rnd3 | ENSMUSG00000017144 | 1.27229 |
| Prr7 | ENSMUSG00000034686 | 1.27027 |
| Rnf19b | ENSMUSG00000028793 | 1.26489 |
| Apoc3 | ENSMUSG00000032081 | 1.26462 |
| Steap1 | ENSMUSG00000015652 | 1.26386 |
| Map3k1 | ENSMUSG00000021754 | 1.26365 |
| Trim30a | ENSMUSG00000030921 | 1.26234 |
| Tlr6 | ENSMUSG00000051498 | 1.26181 |
| Elf4 | ENSMUSG00000031103 | 1.25777 |
| Dpys | ENSMUSG00000022304 | 1.25633 |
| Sirpa | ENSMUSG00000037902 | 1.25546 |
| Gsta2 | ENSMUSG00000057933 | 1.25418 |
| Kctd1 | ENSMUSG00000036225 | 1.25317 |
| Trim21 | ENSMUSG00000030966 | 1.25144 |
| Prr5l | ENSMUSG00000032841 | 1.25044 |
| Acnat2 | ENSMUSG00000060317 | 1.24987 |
| A2m | ENSMUSG00000030111 | 1.24845 |
| Sp110 | ENSMUSG00000070034 | 1.24762 |
| Mir17hg | ENSMUSG00000089726 | 1.24734 |
| Pid1 | ENSMUSG00000045658 | 1.24726 |
| Csf2ra | ENSMUSG00000059326 | 1.24467 |
| Arl4c | ENSMUSG00000049866 | 1.24271 |
| Raph1 | ENSMUSG00000026014 | 1.24216 |
| Gm5637 | ENSMUSG00000046993 | 1.24069 |
| Eif4ebp1 | ENSMUSG00000031490 | 1.23638 |
| Cidec | ENSMUSG00000030278 | 1.23433 |
| Hif3a | ENSMUSG00000004328 | 1.23004 |
| Epsti1 | ENSMUSG00000022014 | 1.22883 |
| Birc2 | ENSMUSG00000057367 | 1.22737 |
| Cxcl16 | ENSMUSG00000018920 | 1.22604 |
| Ccdc109b | ENSMUSG00000027994 | 1.21959 |
| Accn1 | ENSMUSG00000020704 | 1.21841 |
| Ddx58 | ENSMUSG00000040296 | 1.21625 |
| Psme2 | ENSMUSG00000079197 | 1.21551 |
| S1pr2 | ENSMUSG00000043895 | 1.213 |
| Gm5077 | ENSMUSG00000079343 | 1.21259 |
| Gm11451 | ENSMUSG00000083567 | 1.21107 |
| Trim12c | ENSMUSG00000057143 | 1.20973 |
| Acot2 | ENSMUSG00000021226 | 1.20862 |
| Eif1a | ENSMUSG00000057561 | 1.20861 |
| Slc43a1 | ENSMUSG00000027075 | 1.20787 |
| Hopx | ENSMUSG00000059325 | 1.20734 |
| Slc39a4 | ENSMUSG00000063354 | 1.20686 |
| Mab21l3 | ENSMUSG00000044313 | 1.20561 |
| Lrrc15 | ENSMUSG00000052316 | 1.20528 |
| Gm4902 | ENSMUSG00000091649 | 1.20317 |
| H2-T23 | ENSMUSG00000067212 | 1.203 |
| Klf11 | ENSMUSG00000020653 | 1.20087 |
| Rap2b | ENSMUSG00000036894 | 1.20023 |
| Cldn3 | ENSMUSG00000070473 | 1.19951 |
| Mgst1 | ENSMUSG00000008540 | 1.19827 |
| Gm20627 | ENSMUSG00000093507 | 1.19606 |
| Sik1 | ENSMUSG00000024042 | 1.195 |
| Slc1a3 | ENSMUSG00000005360 | 1.19266 |
| Fxyd5 | ENSMUSG00000009687 | 1.19159 |
| Tspan4 | ENSMUSG00000025511 | 1.19016 |
| Muc1 | ENSMUSG00000042784 | 1.18867 |
| Trim47 | ENSMUSG00000020773 | 1.18428 |
| Ddit3 | ENSMUSG00000025408 | 1.1833 |
| Kcnip2 | ENSMUSG00000025221 | 1.18312 |
| Arhgap8 | ENSMUSG00000078954 | 1.18224 |
| 5430427O19Rik | ENSMUSG00000025058 | 1.18165 |
| Gm5530 | ENSMUSG00000087008 | 1.18118 |
| Unc13d | ENSMUSG00000057948 | 1.17663 |
| Lgi2 | ENSMUSG00000039252 | 1.17579 |
| Kng1 | ENSMUSG00000022875 | 1.1736 |
| Fam25c | ENSMUSG00000043681 | 1.17016 |
| Upp1 | ENSMUSG00000020407 | 1.1694 |
| Tnip1 | ENSMUSG00000020400 | 1.16927 |
| Steap4 | ENSMUSG00000012428 | 1.16887 |
| Spns2 | ENSMUSG00000040447 | 1.16837 |
| Fam167a | ENSMUSG00000035095 | 1.16738 |
| Vwa5a | ENSMUSG00000023186 | 1.16635 |
| Ypel2 | ENSMUSG00000018427 | 1.16596 |
| Rras | ENSMUSG00000038387 | 1.16593 |
| Net1 | ENSMUSG00000021215 | 1.16433 |
| Crem | ENSMUSG00000063889 | 1.16372 |
| Gm13420 | ENSMUSG00000079497 | 1.16309 |
| Serpina1a | ENSMUSG00000066366 | 1.16229 |
| Tuba1c | ENSMUSG00000043091 | 1.16155 |
| H2-Eb1 | ENSMUSG00000060586 | 1.1596 |
| Fam100b | ENSMUSG00000050628 | 1.15942 |
| Capn13 | ENSMUSG00000043705 | 1.15734 |
| 1500012F01Rik | ENSMUSG00000074578 | 1.15667 |
| Sptlc2 | ENSMUSG00000021036 | 1.15613 |
| Fap | ENSMUSG00000000392 | 1.15376 |
| Usp43 | ENSMUSG00000020905 | 1.15293 |
| Gm6155 | ENSMUSG00000068629 | 1.14703 |
| Stk32a | ENSMUSG00000039954 | 1.14701 |
| Trpv5 | ENSMUSG00000036899 | 1.14606 |
| Cml2 | ENSMUSG00000033634 | 1.1446 |
| Ltb4r1 | ENSMUSG00000046908 | 1.14395 |
| Lamc2 | ENSMUSG00000026479 | 1.14228 |
| Btg3 | ENSMUSG00000022863 | 1.14221 |
| Eif6 | ENSMUSG00000027613 | 1.14212 |
| Gm15148 | ENSMUSG00000082423 | 1.14035 |
| Car13 | ENSMUSG00000027555 | 1.14005 |
| Map3k14 | ENSMUSG00000020941 | 1.14001 |
| Gm13196 | ENSMUSG00000083378 | 1.13825 |
| Pdlim7 | ENSMUSG00000021493 | 1.13796 |
| AC163325.1 | ENSMUSG00000096950 | 1.13777 |
| Cstb | ENSMUSG00000005054 | 1.13735 |
| Parp12 | ENSMUSG00000038507 | 1.13508 |
| Rpsa-ps12 | ENSMUSG00000080746 | 1.135 |
| Ifih1 | ENSMUSG00000026896 | 1.13392 |
| Sqstm1 | ENSMUSG00000015837 | 1.13378 |
| Sult1a1 | ENSMUSG00000030711 | 1.13001 |
| Sprr1a | ENSMUSG00000050359 | 1.12788 |
| Rnf39 | ENSMUSG00000036492 | 1.12671 |
| Lgals3 | ENSMUSG00000050335 | 1.12569 |
| Rin1 | ENSMUSG00000024883 | 1.12543 |
| Gpr114 | ENSMUSG00000061577 | 1.1251 |
| Adcy7 | ENSMUSG00000031659 | 1.12481 |
| Slc16a6 | ENSMUSG00000041920 | 1.1202 |
| Vmp1 | ENSMUSG00000018171 | 1.11863 |
| Adamts1 | ENSMUSG00000022893 | 1.11784 |
| Rgs2 | ENSMUSG00000026360 | 1.11657 |
| Flnc | ENSMUSG00000068699 | 1.11601 |
| Pros1 | ENSMUSG00000022912 | 1.11492 |
| Cd74 | ENSMUSG00000024610 | 1.11367 |
| Cfb | ENSMUSG00000090231 | 1.11357 |
| Emr1 | ENSMUSG00000004730 | 1.11201 |
| Tubb6 | ENSMUSG00000001473 | 1.1119 |
| Fam65b | ENSMUSG00000036006 | 1.10971 |
| Il7 | ENSMUSG00000040329 | 1.10935 |
| Agt | ENSMUSG00000031980 | 1.10822 |
| Fermt3 | ENSMUSG00000024965 | 1.10724 |
| Pprc1 | ENSMUSG00000055491 | 1.10688 |
| Cd83 | ENSMUSG00000015396 | 1.10419 |
| Ripk3 | ENSMUSG00000022221 | 1.10357 |
| Myh9 | ENSMUSG00000022443 | 1.10251 |
| Sesn2 | ENSMUSG00000028893 | 1.10198 |
| Pf4 | ENSMUSG00000029373 | 1.09902 |
| Kcna7 | ENSMUSG00000038201 | 1.09859 |
| Tor3a | ENSMUSG00000060519 | 1.09589 |
| Hbegf | ENSMUSG00000024486 | 1.09568 |
| Nmi | ENSMUSG00000026946 | 1.09565 |
| Camk2n2 | ENSMUSG00000051146 | 1.09372 |
| Eif3s6-ps1 | ENSMUSG00000081629 | 1.09316 |
| Derl3 | ENSMUSG00000009092 | 1.08515 |
| Galntl2 | ENSMUSG00000021903 | 1.08374 |
| Ifi35 | ENSMUSG00000010358 | 1.0837 |
| Mob3a | ENSMUSG00000003348 | 1.08274 |
| Per1 | ENSMUSG00000020893 | 1.08174 |
| Nxnl2 | ENSMUSG00000021396 | 1.08007 |
| AC136147.1 | ENSMUSG00000097928 | 1.08002 |
| Dnaaf3 | ENSMUSG00000055809 | 1.07713 |
| Tnfsf10 | ENSMUSG00000039304 | 1.07662 |
| Bzw2 | ENSMUSG00000020547 | 1.07654 |
| Plekho1 | ENSMUSG00000015745 | 1.07611 |
| Cpne8 | ENSMUSG00000052560 | 1.07186 |
| Epha2 | ENSMUSG00000006445 | 1.07008 |
| Lad1 | ENSMUSG00000041782 | 1.06858 |
| Eci1 | ENSMUSG00000024132 | 1.06781 |
| Ggt6 | ENSMUSG00000040471 | 1.06661 |
| Mxd1 | ENSMUSG00000001156 | 1.06622 |
| Zyx | ENSMUSG00000029860 | 1.06285 |
| Anxa3 | ENSMUSG00000029484 | 1.0618 |
| Zc3h12a | ENSMUSG00000042677 | 1.06176 |
| Card14 | ENSMUSG00000013483 | 1.06108 |
| Xbp1 | ENSMUSG00000020484 | 1.05964 |
| Txnip | ENSMUSG00000038393 | 1.05799 |
| Chrnb1 | ENSMUSG00000041189 | 1.05695 |
| AL591207.1 | ENSMUSG00000097758 | 1.05626 |
| Hr | ENSMUSG00000022096 | 1.05354 |
| Tnfrsf1a | ENSMUSG00000030341 | 1.05129 |
| Gm11620 | ENSMUSG00000081965 | 1.05097 |
| Serpina1c | ENSMUSG00000079015 | 1.0505 |
| Pdxk | ENSMUSG00000032788 | 1.04682 |
| Zc3hav1 | ENSMUSG00000029826 | 1.04596 |
| Abca17 | ENSMUSG00000035435 | 1.04585 |
| Ifngr2 | ENSMUSG00000022965 | 1.04481 |
| Odf4 | ENSMUSG00000032921 | 1.04292 |
| Tes | ENSMUSG00000029552 | 1.04206 |
| Mcl1 | ENSMUSG00000038612 | 1.04055 |
| Reep6 | ENSMUSG00000035504 | 1.0394 |
| Apoh | ENSMUSG00000000049 | 1.03851 |
| Pik3cg | ENSMUSG00000020573 | 1.03848 |
| Mapkapk2 | ENSMUSG00000016528 | 1.03829 |
| Basp1 | ENSMUSG00000045763 | 1.03789 |
| Jazf1 | ENSMUSG00000063568 | 1.03618 |
| Gm11824 | ENSMUSG00000082128 | 1.03565 |
| Gda | ENSMUSG00000058624 | 1.03245 |
| Itpkc | ENSMUSG00000003752 | 1.02715 |
| AC111044.1 | ENSMUSG00000093798 | 1.02526 |
| Gas5 | ENSMUSG00000053332 | 1.02387 |
| Wdfy4 | ENSMUSG00000051506 | 1.02172 |
| Bak1 | ENSMUSG00000057789 | 1.02046 |
| Gcnt4 | ENSMUSG00000091387 | 1.01661 |
| Ehhadh | ENSMUSG00000022853 | 1.01536 |
| Flot1 | ENSMUSG00000059714 | 1.01519 |
| Erap1 | ENSMUSG00000021583 | 1.01435 |
| Hmha1 | ENSMUSG00000035697 | 1.01253 |
| Cldn7 | ENSMUSG00000018569 | 1.00776 |
| Bend4 | ENSMUSG00000092060 | 1.0071 |
| 2410004N09Rik | ENSMUSG00000087590 | 1.00495 |
| Rhoc | ENSMUSG00000002233 | 1.00249 |
| Slco1a4 | ENSMUSG00000030237 | 1.00163 |
| Zbtb42 | ENSMUSG00000037638 | 1.00139 |
| Carhsp1 | ENSMUSG00000008393 | 1.00033 |
| Slc5a2 | ENSMUSG00000030781 | -1.00101 |
| St6galnac3 | ENSMUSG00000052544 | -1.00152 |
| Eltd1 | ENSMUSG00000039167 | -1.00242 |
| Sgtb | ENSMUSG00000042743 | -1.00259 |
| Slc2a13 | ENSMUSG00000036298 | -1.00368 |
| Npy1r | ENSMUSG00000036437 | -1.00439 |
| Slc18a2 | ENSMUSG00000025094 | -1.00461 |
| Nphp4 | ENSMUSG00000039577 | -1.00496 |
| Itm2a | ENSMUSG00000031239 | -1.00503 |
| Pygo1 | ENSMUSG00000034910 | -1.0058 |
| Tie1 | ENSMUSG00000033191 | -1.00777 |
| Gm15343 | ENSMUSG00000085468 | -1.00801 |
| Rgs9 | ENSMUSG00000020599 | -1.00852 |
| Syt13 | ENSMUSG00000027220 | -1.01217 |
| Pdlim4 | ENSMUSG00000020388 | -1.01272 |
| Coch | ENSMUSG00000020953 | -1.01322 |
| Ldlr | ENSMUSG00000032193 | -1.01612 |
| Ephb1 | ENSMUSG00000032537 | -1.01913 |
| Acy3 | ENSMUSG00000024866 | -1.01941 |
| Acot11 | ENSMUSG00000034853 | -1.02051 |
| Kcns1 | ENSMUSG00000040164 | -1.02058 |
| Pcsk6 | ENSMUSG00000030513 | -1.02091 |
| Lypd2 | ENSMUSG00000022595 | -1.02098 |
| 9030619P08Rik | ENSMUSG00000053168 | -1.02139 |
| Clec11a | ENSMUSG00000004473 | -1.02192 |
| S1pr3 | ENSMUSG00000067586 | -1.023 |
| Clstn3 | ENSMUSG00000008153 | -1.02584 |
| Tkt | ENSMUSG00000021957 | -1.02671 |
| Tmem108 | ENSMUSG00000042757 | -1.02816 |
| Hes2 | ENSMUSG00000028940 | -1.03193 |
| Btc | ENSMUSG00000082361 | -1.03328 |
| Sucnr1 | ENSMUSG00000027762 | -1.03689 |
| Frzb | ENSMUSG00000027004 | -1.03712 |
| Gm3571 | ENSMUSG00000090610 | -1.03728 |
| Exoc3l | ENSMUSG00000043251 | -1.03781 |
| Inmt | ENSMUSG00000003477 | -1.03971 |
| A430107O13Rik | ENSMUSG00000062980 | -1.03993 |
| Zfp937 | ENSMUSG00000060336 | -1.04127 |
| Hey1 | ENSMUSG00000040289 | -1.04409 |
| Igj | ENSMUSG00000067149 | -1.04424 |
| Gucy2g | ENSMUSG00000055523 | -1.04545 |
| Ucp3 | ENSMUSG00000032942 | -1.04942 |
| Slc22a29 | ENSMUSG00000075044 | -1.04995 |
| Calcrl | ENSMUSG00000059588 | -1.05004 |
| Pde2a | ENSMUSG00000030653 | -1.05034 |
| Col5a1 | ENSMUSG00000026837 | -1.05055 |
| Adamts12 | ENSMUSG00000047497 | -1.05445 |
| Tmem86a | ENSMUSG00000010307 | -1.05672 |
| Gm12454 | ENSMUSG00000087142 | -1.05959 |
| Nlrc3 | ENSMUSG00000049871 | -1.06055 |
| Car7 | ENSMUSG00000031883 | -1.06442 |
| Kcnh4 | ENSMUSG00000035355 | -1.06492 |
| Vash1 | ENSMUSG00000021256 | -1.06547 |
| Snap91 | ENSMUSG00000033419 | -1.06563 |
| Elfn1 | ENSMUSG00000048988 | -1.06654 |
| Slc18a1 | ENSMUSG00000036330 | -1.06658 |
| Camk2a | ENSMUSG00000024617 | -1.0676 |
| Hmcn2 | ENSMUSG00000055632 | -1.06798 |
| Tlcd2 | ENSMUSG00000038217 | -1.06913 |
| Phlda3 | ENSMUSG00000041801 | -1.06941 |
| Igf1 | ENSMUSG00000020053 | -1.07357 |
| Corin | ENSMUSG00000005220 | -1.07435 |
| Scrn1 | ENSMUSG00000019124 | -1.07603 |
| Esm1 | ENSMUSG00000042379 | -1.07771 |
| Scd2 | ENSMUSG00000025203 | -1.0783 |
| B3galnt1 | ENSMUSG00000043300 | -1.07916 |
| Spp2 | ENSMUSG00000026295 | -1.08024 |
| Rab36 | ENSMUSG00000020175 | -1.08143 |
| C330021F23Rik | ENSMUSG00000065952 | -1.08263 |
| Col16a1 | ENSMUSG00000040690 | -1.08326 |
| Akr1c21 | ENSMUSG00000021207 | -1.08353 |
| Tnxb | ENSMUSG00000033327 | -1.08442 |
| Tmem119 | ENSMUSG00000054675 | -1.08465 |
| Chrnb4 | ENSMUSG00000035200 | -1.08518 |
| Aff3 | ENSMUSG00000037138 | -1.08569 |
| Cldn9 | ENSMUSG00000066720 | -1.08692 |
| Ptpn22 | ENSMUSG00000027843 | -1.08804 |
| 1810010H24Rik | ENSMUSG00000078607 | -1.08846 |
| Wnk2 | ENSMUSG00000037989 | -1.09057 |
| Olfm3 | ENSMUSG00000027965 | -1.09172 |
| Dusp15 | ENSMUSG00000042662 | -1.09691 |
| Clec2h | ENSMUSG00000030364 | -1.09698 |
| Il5ra | ENSMUSG00000005364 | -1.09816 |
| Pygm | ENSMUSG00000032648 | -1.09877 |
| Mep1b | ENSMUSG00000024313 | -1.10023 |
| Cpne5 | ENSMUSG00000024008 | -1.10094 |
| Ptprr | ENSMUSG00000020151 | -1.10274 |
| Ncrna00086 | ENSMUSG00000054850 | -1.10354 |
| Insig1 | ENSMUSG00000045294 | -1.10399 |
| Itih5 | ENSMUSG00000025780 | -1.10399 |
| Traip | ENSMUSG00000032586 | -1.10402 |
| Gusb | ENSMUSG00000025534 | -1.10412 |
| Fxyd6 | ENSMUSG00000066705 | -1.10416 |
| Dnajc12 | ENSMUSG00000036764 | -1.10683 |
| Tmem64 | ENSMUSG00000043252 | -1.11053 |
| Rcn3 | ENSMUSG00000019539 | -1.11133 |
| Ttc25 | ENSMUSG00000006784 | -1.11454 |
| Osbp2 | ENSMUSG00000020435 | -1.11584 |
| Col6a6 | ENSMUSG00000043719 | -1.12141 |
| Hsf4 | ENSMUSG00000033249 | -1.12217 |
| Syngr3 | ENSMUSG00000007021 | -1.12236 |
| Zfp286 | ENSMUSG00000047342 | -1.12243 |
| Kcnab3 | ENSMUSG00000018470 | -1.12329 |
| Kif27 | ENSMUSG00000060176 | -1.12448 |
| Mpped1 | ENSMUSG00000041708 | -1.12471 |
| Pole | ENSMUSG00000007080 | -1.12496 |
| Bgn | ENSMUSG00000031375 | -1.12562 |
| Kcnj12 | ENSMUSG00000042529 | -1.1303 |
| Ren1 | ENSMUSG00000070645 | -1.13268 |
| Fkbp10 | ENSMUSG00000001555 | -1.13475 |
| Vps8 | ENSMUSG00000033653 | -1.13508 |
| Sox18 | ENSMUSG00000046470 | -1.13691 |
| Tppp3 | ENSMUSG00000014846 | -1.13731 |
| Myl9 | ENSMUSG00000067818 | -1.13773 |
| Ccdc3 | ENSMUSG00000026676 | -1.13879 |
| Rnf144a | ENSMUSG00000020642 | -1.1389 |
| Rps6kl1 | ENSMUSG00000019235 | -1.14007 |
| AC139320.1 | ENSMUSG00000097651 | -1.14238 |
| Cckar | ENSMUSG00000029193 | -1.14359 |
| Wasf3 | ENSMUSG00000029636 | -1.14603 |
| Calb1 | ENSMUSG00000028222 | -1.14612 |
| Dclk2 | ENSMUSG00000028078 | -1.14687 |
| Acly | ENSMUSG00000020917 | -1.14724 |
| Bcl2l15 | ENSMUSG00000044165 | -1.14845 |
| Mef2c | ENSMUSG00000005583 | -1.1528 |
| 5830411N06Rik | ENSMUSG00000054672 | -1.1549 |
| Acmsd | ENSMUSG00000026348 | -1.15504 |
| Gys2 | ENSMUSG00000030244 | -1.15555 |
| Gm14928 | ENSMUSG00000082718 | -1.15606 |
| Gm13110 | ENSMUSG00000086810 | -1.15726 |
| Shisa2 | ENSMUSG00000044461 | -1.15783 |
| Tceal5 | ENSMUSG00000054034 | -1.16064 |
| Vwa1 | ENSMUSG00000042116 | -1.16438 |
| Hsd3b3 | ENSMUSG00000062410 | -1.16582 |
| Kcnb1 | ENSMUSG00000050556 | -1.1666 |
| Fndc1 | ENSMUSG00000071984 | -1.16987 |
| Pcdhb9 | ENSMUSG00000051242 | -1.17807 |
| Spr-ps1 | ENSMUSG00000068303 | -1.17813 |
| Vat1l | ENSMUSG00000046844 | -1.17942 |
| Apcdd1 | ENSMUSG00000071847 | -1.18026 |
| 4930578C19Rik | ENSMUSG00000037358 | -1.18031 |
| She | ENSMUSG00000046280 | -1.18076 |
| Gfra2 | ENSMUSG00000022103 | -1.18222 |
| Gatsl2 | ENSMUSG00000015944 | -1.18328 |
| Erg | ENSMUSG00000040732 | -1.18394 |
| 4930452B06Rik | ENSMUSG00000021747 | -1.18489 |
| Kdr | ENSMUSG00000062960 | -1.18602 |
| Gpc6 | ENSMUSG00000058571 | -1.18694 |
| Aatk | ENSMUSG00000025375 | -1.18826 |
| Nat8l | ENSMUSG00000048142 | -1.18991 |
| Mrvi1 | ENSMUSG00000005611 | -1.18998 |
| 2700033N17Rik | ENSMUSG00000086328 | -1.19106 |
| 1700028J19Rik | ENSMUSG00000038782 | -1.19405 |
| 5830473C10Rik | ENSMUSG00000070690 | -1.1945 |
| Gjb6 | ENSMUSG00000040055 | -1.19564 |
| Chrna4 | ENSMUSG00000027577 | -1.19846 |
| Prrx1 | ENSMUSG00000026586 | -1.2001 |
| Slc35f1 | ENSMUSG00000038602 | -1.20321 |
| Fbln1 | ENSMUSG00000006369 | -1.20393 |
| Zcchc12 | ENSMUSG00000036699 | -1.20404 |
| Figf | ENSMUSG00000031380 | -1.2042 |
| Fbxo40 | ENSMUSG00000047746 | -1.2047 |
| Cym | ENSMUSG00000046213 | -1.20497 |
| Slc26a8 | ENSMUSG00000036196 | -1.20507 |
| Slc46a3 | ENSMUSG00000029650 | -1.20821 |
| Afap1l1 | ENSMUSG00000033032 | -1.20832 |
| 1700019D03Rik | ENSMUSG00000043629 | -1.20943 |
| Col28a1 | ENSMUSG00000068794 | -1.21145 |
| Tmem25 | ENSMUSG00000002032 | -1.21615 |
| Vstm4 | ENSMUSG00000050666 | -1.21678 |
| Eln | ENSMUSG00000029675 | -1.2173 |
| Daam2 | ENSMUSG00000040260 | -1.21828 |
| Col15a1 | ENSMUSG00000028339 | -1.21835 |
| Gm6166 | ENSMUSG00000074280 | -1.21836 |
| Gm12892 | ENSMUSG00000083679 | -1.221 |
| Ghrhr | ENSMUSG00000004654 | -1.22124 |
| Dapk2 | ENSMUSG00000032380 | -1.2225 |
| 4-Sep | ENSMUSG00000020486 | -1.22313 |
| Kcnd3 | ENSMUSG00000040896 | -1.22331 |
| F2rl3 | ENSMUSG00000050147 | -1.22372 |
| Defb19 | ENSMUSG00000050645 | -1.22498 |
| Col6a3 | ENSMUSG00000048126 | -1.22533 |
| Nfasc | ENSMUSG00000026442 | -1.22837 |
| Kank4 | ENSMUSG00000035407 | -1.22838 |
| AC156021.1 | ENSMUSG00000097673 | -1.22929 |
| Rwdd2a | ENSMUSG00000032417 | -1.22987 |
| Olfml2a | ENSMUSG00000046618 | -1.23157 |
| Dnajc6 | ENSMUSG00000028528 | -1.23443 |
| Irs4 | ENSMUSG00000054667 | -1.23571 |
| Kcnt2 | ENSMUSG00000052726 | -1.23756 |
| Naalad2 | ENSMUSG00000043943 | -1.23879 |
| Tek | ENSMUSG00000006386 | -1.24045 |
| Lep | ENSMUSG00000059201 | -1.241 |
| Lonrf2 | ENSMUSG00000048814 | -1.24333 |
| Gm12315 | ENSMUSG00000085952 | -1.24341 |
| 3632451O06Rik | ENSMUSG00000036242 | -1.24376 |
| Pbk | ENSMUSG00000022033 | -1.24617 |
| Gm5887 | ENSMUSG00000072662 | -1.2498 |
| Cldn18 | ENSMUSG00000032473 | -1.25162 |
| Ranbp3l | ENSMUSG00000048424 | -1.25648 |
| Gm14788 | ENSMUSG00000081235 | -1.25887 |
| D630042P16Rik | ENSMUSG00000034387 | -1.25929 |
| Col1a2 | ENSMUSG00000029661 | -1.2595 |
| Cpm | ENSMUSG00000020183 | -1.25963 |
| Mrc2 | ENSMUSG00000020695 | -1.26179 |
| Ckb | ENSMUSG00000001270 | -1.26183 |
| Filip1 | ENSMUSG00000034898 | -1.26222 |
| Dhcr7 | ENSMUSG00000058454 | -1.26422 |
| Meis1 | ENSMUSG00000020160 | -1.26434 |
| Aqp2 | ENSMUSG00000023013 | -1.26447 |
| Tal2 | ENSMUSG00000028417 | -1.26749 |
| Ugt2b34 | ENSMUSG00000029260 | -1.2685 |
| Ptprn | ENSMUSG00000026204 | -1.26986 |
| Cpxm1 | ENSMUSG00000027408 | -1.27332 |
| Sult4a1 | ENSMUSG00000018865 | -1.27393 |
| Anxa13 | ENSMUSG00000055114 | -1.27566 |
| Ngfr | ENSMUSG00000000120 | -1.27584 |
| Slc26a10 | ENSMUSG00000040441 | -1.27904 |
| Ppp1r3b | ENSMUSG00000046794 | -1.27953 |
| Sostdc1 | ENSMUSG00000036169 | -1.28066 |
| Pfn3 | ENSMUSG00000044444 | -1.28162 |
| Dtl | ENSMUSG00000037474 | -1.28427 |
| Pcdha10 | ENSMUSG00000007440 | -1.2844 |
| Myo5a | ENSMUSG00000034593 | -1.28507 |
| Col1a1 | ENSMUSG00000001506 | -1.28527 |
| Smoc2 | ENSMUSG00000023886 | -1.28825 |
| Ppard | ENSMUSG00000002250 | -1.28838 |
| Gm15318 | ENSMUSG00000086010 | -1.28948 |
| Otoa | ENSMUSG00000034990 | -1.29395 |
| H2-Q10 | ENSMUSG00000067235 | -1.29669 |
| Mybpc3 | ENSMUSG00000002100 | -1.29822 |
| Exo1 | ENSMUSG00000039748 | -1.2991 |
| A530016L24Rik | ENSMUSG00000043122 | -1.30328 |
| Tmprss9 | ENSMUSG00000059406 | -1.30429 |
| Ctsk | ENSMUSG00000028111 | -1.30475 |
| Eng | ENSMUSG00000026814 | -1.30712 |
| Mvk | ENSMUSG00000041939 | -1.30818 |
| Npb | ENSMUSG00000044034 | -1.30838 |
| Gm757 | ENSMUSG00000089953 | -1.30897 |
| Hsd17b11 | ENSMUSG00000029311 | -1.30943 |
| Slc34a3 | ENSMUSG00000006469 | -1.31129 |
| Emcn | ENSMUSG00000054690 | -1.31242 |
| Idi1 | ENSMUSG00000058258 | -1.31514 |
| Rhox6 | ENSMUSG00000006200 | -1.31795 |
| Nkd1 | ENSMUSG00000031661 | -1.32084 |
| Lrrc66 | ENSMUSG00000067206 | -1.32269 |
| Negr1 | ENSMUSG00000040037 | -1.32686 |
| Cdkl1 | ENSMUSG00000020990 | -1.32735 |
| Ces2h | ENSMUSG00000091813 | -1.32775 |
| Kcnj8 | ENSMUSG00000030247 | -1.33171 |
| Rbp1 | ENSMUSG00000046402 | -1.33387 |
| Nsdhl | ENSMUSG00000031349 | -1.33951 |
| Ppp1r14a | ENSMUSG00000037166 | -1.34387 |
| Arhgef39 | ENSMUSG00000051517 | -1.34449 |
| Apba1 | ENSMUSG00000024897 | -1.345 |
| Slc8a1 | ENSMUSG00000054640 | -1.34782 |
| Atp2a3 | ENSMUSG00000020788 | -1.35386 |
| Gm13502 | ENSMUSG00000083287 | -1.35531 |
| Scd1 | ENSMUSG00000037071 | -1.36229 |
| Akr1b7 | ENSMUSG00000052131 | -1.36285 |
| B3galt1 | ENSMUSG00000034780 | -1.3633 |
| Ramp3 | ENSMUSG00000041046 | -1.36361 |
| Myct1 | ENSMUSG00000046916 | -1.36376 |
| Fam38b | ENSMUSG00000041482 | -1.36753 |
| Lum | ENSMUSG00000036446 | -1.37717 |
| Slc26a7 | ENSMUSG00000040569 | -1.37784 |
| Dnahc11 | ENSMUSG00000018581 | -1.37822 |
| Plvap | ENSMUSG00000034845 | -1.37887 |
| Hoxd11 | ENSMUSG00000042499 | -1.37899 |
| Cpt1c | ENSMUSG00000007783 | -1.38019 |
| Angptl2 | ENSMUSG00000004105 | -1.38107 |
| Kif2c | ENSMUSG00000028678 | -1.38236 |
| Ogn | ENSMUSG00000021390 | -1.38256 |
| Cfh | ENSMUSG00000026365 | -1.38449 |
| Cacna2d2 | ENSMUSG00000010066 | -1.38535 |
| Depdc1b | ENSMUSG00000021697 | -1.39152 |
| Ptpru | ENSMUSG00000028909 | -1.39518 |
| Dact3 | ENSMUSG00000078794 | -1.39951 |
| Ldb2 | ENSMUSG00000039706 | -1.40093 |
| Rarb | ENSMUSG00000017491 | -1.40439 |
| Col6a1 | ENSMUSG00000001119 | -1.40458 |
| Serpinc1 | ENSMUSG00000026715 | -1.40754 |
| Gm11295 | ENSMUSG00000084038 | -1.40987 |
| Gucy1b3 | ENSMUSG00000028005 | -1.41046 |
| Gm12678 | ENSMUSG00000084854 | -1.412 |
| Gpr176 | ENSMUSG00000040133 | -1.41285 |
| Meg3 | ENSMUSG00000021268 | -1.41472 |
| Adra2c | ENSMUSG00000045318 | -1.41486 |
| Dnahc2 | ENSMUSG00000005237 | -1.41645 |
| Gm16332 | ENSMUSG00000089991 | -1.41816 |
| Olfml2b | ENSMUSG00000038463 | -1.41887 |
| Rab3b | ENSMUSG00000003411 | -1.4203 |
| Ednrb | ENSMUSG00000022122 | -1.42177 |
| Cdx4 | ENSMUSG00000031326 | -1.42186 |
| Dgkb | ENSMUSG00000036095 | -1.42207 |
| Neil3 | ENSMUSG00000039396 | -1.42711 |
| Miox | ENSMUSG00000022613 | -1.42764 |
| Sema6c | ENSMUSG00000038777 | -1.42926 |
| Pdzrn4 | ENSMUSG00000036218 | -1.43391 |
| Slc14a1 | ENSMUSG00000059336 | -1.43514 |
| Gm13404 | ENSMUSG00000086904 | -1.4353 |
| Lhfp | ENSMUSG00000048332 | -1.43761 |
| Cyp2c69 | ENSMUSG00000092008 | -1.43811 |
| Pdgfra | ENSMUSG00000029231 | -1.44206 |
| BC043934 | ENSMUSG00000056418 | -1.44682 |
| Kif20b | ENSMUSG00000024795 | -1.44694 |
| Enho | ENSMUSG00000028445 | -1.44795 |
| Ndst3 | ENSMUSG00000027977 | -1.44909 |
| Ccdc151 | ENSMUSG00000039632 | -1.45498 |
| Mt3 | ENSMUSG00000031760 | -1.45845 |
| Mgat5b | ENSMUSG00000043857 | -1.45974 |
| Arhgef9 | ENSMUSG00000025656 | -1.46195 |
| Prox1 | ENSMUSG00000010175 | -1.46399 |
| Fam65c | ENSMUSG00000074577 | -1.46649 |
| D430019H16Rik | ENSMUSG00000094910 | -1.47177 |
| Btnl10 | ENSMUSG00000020490 | -1.47437 |
| Mn1 | ENSMUSG00000070576 | -1.47589 |
| Wfdc16 | ENSMUSG00000070530 | -1.47986 |
| Col8a2 | ENSMUSG00000056174 | -1.48122 |
| Fam101a | ENSMUSG00000037962 | -1.48249 |
| Nxpe3 | ENSMUSG00000075033 | -1.4834 |
| Snca | ENSMUSG00000025889 | -1.48757 |
| Nxph4 | ENSMUSG00000040258 | -1.49477 |
| Ret | ENSMUSG00000030110 | -1.50256 |
| Gramd2 | ENSMUSG00000074259 | -1.50282 |
| Rab42 | ENSMUSG00000089687 | -1.50446 |
| Kcnj5 | ENSMUSG00000032034 | -1.50966 |
| Ltbp4 | ENSMUSG00000040488 | -1.512 |
| Gm4980 | ENSMUSG00000096606 | -1.51318 |
| Mmp2 | ENSMUSG00000031740 | -1.51521 |
| Dlg2 | ENSMUSG00000052572 | -1.51595 |
| A730017C20Rik | ENSMUSG00000050875 | -1.52345 |
| 2900011O08Rik | ENSMUSG00000044117 | -1.52549 |
| Kcne4 | ENSMUSG00000047330 | -1.52973 |
| Cend1 | ENSMUSG00000060240 | -1.53029 |
| Tmem179 | ENSMUSG00000054013 | -1.53243 |
| Pnpla3 | ENSMUSG00000041653 | -1.54509 |
| Mmp15 | ENSMUSG00000031790 | -1.54906 |
| Gm14328 | ENSMUSG00000095419 | -1.55009 |
| Acaca | ENSMUSG00000020532 | -1.55015 |
| Scd4 | ENSMUSG00000050195 | -1.55018 |
| Tenm2 | ENSMUSG00000049336 | -1.5548 |
| Tmem204 | ENSMUSG00000024168 | -1.55735 |
| Ptprb | ENSMUSG00000020154 | -1.56062 |
| Rtn1 | ENSMUSG00000021087 | -1.56143 |
| Tcf21 | ENSMUSG00000045680 | -1.56159 |
| Gata6 | ENSMUSG00000005836 | -1.56227 |
| Wscd1 | ENSMUSG00000020811 | -1.56273 |
| Exoc3l2 | ENSMUSG00000011263 | -1.56281 |
| Fer1l6 | ENSMUSG00000037106 | -1.56491 |
| 6330403A02Rik | ENSMUSG00000053963 | -1.56531 |
| Ctnna2 | ENSMUSG00000063063 | -1.56536 |
| 3-Sep | ENSMUSG00000022456 | -1.57009 |
| Aplnr | ENSMUSG00000044338 | -1.57245 |
| Pcsk9 | ENSMUSG00000044254 | -1.57317 |
| Kctd14 | ENSMUSG00000051727 | -1.57331 |
| Lrrc3b | ENSMUSG00000045201 | -1.57594 |
| Rerg | ENSMUSG00000030222 | -1.58079 |
| Gabrb3 | ENSMUSG00000033676 | -1.58248 |
| Ska1 | ENSMUSG00000036223 | -1.58409 |
| Hapln3 | ENSMUSG00000030606 | -1.58592 |
| 4931417G12Rik | ENSMUSG00000033963 | -1.58696 |
| Nkx3-1 | ENSMUSG00000022061 | -1.58699 |
| Prelp | ENSMUSG00000041577 | -1.5913 |
| Chst2 | ENSMUSG00000033350 | -1.59173 |
| Gsdmc4 | ENSMUSG00000055748 | -1.5933 |
| Glp1r | ENSMUSG00000024027 | -1.59337 |
| Fbln2 | ENSMUSG00000064080 | -1.59988 |
| 9330182L06Rik | ENSMUSG00000056004 | -1.60959 |
| Hic1 | ENSMUSG00000043099 | -1.60992 |
| Btnl9 | ENSMUSG00000040283 | -1.61279 |
| Ighm | ENSMUSG00000076617 | -1.61335 |
| Angptl7 | ENSMUSG00000028989 | -1.61579 |
| Kcna6 | ENSMUSG00000038077 | -1.61704 |
| Rasgrp3 | ENSMUSG00000071042 | -1.62264 |
| Hsd3b2 | ENSMUSG00000063730 | -1.62277 |
| Col6a2 | ENSMUSG00000020241 | -1.62469 |
| Brsk2 | ENSMUSG00000053046 | -1.62666 |
| Aqp8 | ENSMUSG00000030762 | -1.63189 |
| Camk1g | ENSMUSG00000016179 | -1.6322 |
| Igkc | ENSMUSG00000076609 | -1.63764 |
| Mylk3 | ENSMUSG00000031698 | -1.6413 |
| Ltbp1 | ENSMUSG00000001870 | -1.64555 |
| Clstn2 | ENSMUSG00000032452 | -1.64932 |
| Slc9a8 | ENSMUSG00000039463 | -1.65488 |
| Slc6a12 | ENSMUSG00000030109 | -1.65505 |
| Fam151a | ENSMUSG00000034871 | -1.65738 |
| Wisp2 | ENSMUSG00000027656 | -1.6614 |
| Cxxc4 | ENSMUSG00000044365 | -1.66201 |
| Fibin | ENSMUSG00000074971 | -1.66654 |
| Ramp1 | ENSMUSG00000034353 | -1.66864 |
| Prkcg | ENSMUSG00000078816 | -1.66869 |
| Crispld1 | ENSMUSG00000025776 | -1.67004 |
| Lilra5 | ENSMUSG00000070873 | -1.67055 |
| 1810041L15Rik | ENSMUSG00000062760 | -1.67194 |
| Rbfox1 | ENSMUSG00000008658 | -1.67349 |
| Lmod3 | ENSMUSG00000044086 | -1.67414 |
| Rnft2 | ENSMUSG00000032850 | -1.6742 |
| Olfml3 | ENSMUSG00000027848 | -1.67864 |
| Grem1 | ENSMUSG00000074934 | -1.68436 |
| Islr | ENSMUSG00000037206 | -1.68549 |
| B4galnt4 | ENSMUSG00000055629 | -1.69043 |
| D130043K22Rik | ENSMUSG00000006711 | -1.69163 |
| Rnf24 | ENSMUSG00000048911 | -1.6923 |
| Gm20621 | ENSMUSG00000093394 | -1.69523 |
| 2210406O10Rik | ENSMUSG00000039563 | -1.69583 |
| Gabra3 | ENSMUSG00000031343 | -1.69693 |
| Tmem182 | ENSMUSG00000079588 | -1.70736 |
| Cpne4 | ENSMUSG00000032564 | -1.70936 |
| Ccdc48 | ENSMUSG00000068263 | -1.71312 |
| Cbln1 | ENSMUSG00000031654 | -1.71679 |
| Cyp2j8 | ENSMUSG00000082932 | -1.72298 |
| Gatm | ENSMUSG00000027199 | -1.72677 |
| Kcng1 | ENSMUSG00000074575 | -1.73259 |
| Chi3l4 | ENSMUSG00000063779 | -1.73592 |
| Emid1 | ENSMUSG00000034164 | -1.73692 |
| Kcnh2 | ENSMUSG00000038319 | -1.74455 |
| Calca | ENSMUSG00000030669 | -1.7454 |
| Cela1 | ENSMUSG00000023031 | -1.75795 |
| Nmnat2 | ENSMUSG00000042751 | -1.76301 |
| 2010110P09Rik | ENSMUSG00000030865 | -1.76527 |
| Dcst1 | ENSMUSG00000042672 | -1.76576 |
| Scml4 | ENSMUSG00000044770 | -1.76677 |
| Abca6 | ENSMUSG00000044749 | -1.77566 |
| Ripply3 | ENSMUSG00000022941 | -1.77902 |
| Gm14290 | ENSMUSG00000086605 | -1.78291 |
| Astn1 | ENSMUSG00000026587 | -1.78725 |
| Mmp12 | ENSMUSG00000049723 | -1.79234 |
| Add2 | ENSMUSG00000030000 | -1.79614 |
| Col14a1 | ENSMUSG00000022371 | -1.79876 |
| Pcdh12 | ENSMUSG00000024440 | -1.8027 |
| Lrrc10b | ENSMUSG00000090291 | -1.80748 |
| Igsf21 | ENSMUSG00000040972 | -1.80857 |
| Gm11827 | ENSMUSG00000086765 | -1.80995 |
| Gucy1a3 | ENSMUSG00000033910 | -1.82262 |
| Tmem200a | ENSMUSG00000049420 | -1.82281 |
| Lrrd1 | ENSMUSG00000040367 | -1.82313 |
| Rem1 | ENSMUSG00000000359 | -1.82322 |
| Mapk10 | ENSMUSG00000046709 | -1.83074 |
| Lamc3 | ENSMUSG00000026840 | -1.83084 |
| 7SK | ENSMUSG00000088049 | -1.83315 |
| Tubb4a | ENSMUSG00000062591 | -1.83379 |
| Cit | ENSMUSG00000029516 | -1.83502 |
| H19 | ENSMUSG00000000031 | -1.84161 |
| Kcnip3 | ENSMUSG00000079056 | -1.84627 |
| Matn2 | ENSMUSG00000022324 | -1.84807 |
| Abi3bp | ENSMUSG00000035258 | -1.85123 |
| Fbln5 | ENSMUSG00000021186 | -1.85885 |
| Tagln3 | ENSMUSG00000022658 | -1.86599 |
| Bean1 | ENSMUSG00000031872 | -1.86613 |
| Pnldc1 | ENSMUSG00000073460 | -1.86775 |
| Sez6l | ENSMUSG00000058153 | -1.88181 |
| Cdsn | ENSMUSG00000039518 | -1.90104 |
| B230312C02Rik | ENSMUSG00000084843 | -1.90625 |
| Clec14a | ENSMUSG00000045930 | -1.90711 |
| Ecm2 | ENSMUSG00000043631 | -1.91079 |
| Disp2 | ENSMUSG00000040035 | -1.9114 |
| Itga8 | ENSMUSG00000026768 | -1.91373 |
| Sema3d | ENSMUSG00000040254 | -1.91859 |
| Syt5 | ENSMUSG00000004961 | -1.92265 |
| Col11a1 | ENSMUSG00000027966 | -1.93052 |
| Epha3 | ENSMUSG00000052504 | -1.93483 |
| Spock3 | ENSMUSG00000054162 | -1.93691 |
| Nrg2 | ENSMUSG00000060275 | -1.93726 |
| Uchl1 | ENSMUSG00000029223 | -1.94848 |
| Ccdc67 | ENSMUSG00000039977 | -1.95716 |
| Ncam2 | ENSMUSG00000022762 | -1.95908 |
| Gm12501 | ENSMUSG00000083462 | -1.9631 |
| Ppp2r2c | ENSMUSG00000029120 | -1.96993 |
| Igfbp5 | ENSMUSG00000026185 | -1.97415 |
| Duox1 | ENSMUSG00000033268 | -1.98364 |
| Ralyl | ENSMUSG00000039717 | -1.98422 |
| Tgm3 | ENSMUSG00000027401 | -1.98907 |
| Rbfox3 | ENSMUSG00000025576 | -1.99039 |
| 3110099E03Rik | ENSMUSG00000085582 | -1.99113 |
| Robo3 | ENSMUSG00000032128 | -1.99145 |
| Spon2 | ENSMUSG00000037379 | -1.99238 |
| Ttr | ENSMUSG00000061808 | -1.99259 |
| Spag5 | ENSMUSG00000002055 | -2.00009 |
| Ifitm7 | ENSMUSG00000065968 | -2.00163 |
| Cox6a2 | ENSMUSG00000030785 | -2.00623 |
| Pcdh18 | ENSMUSG00000037892 | -2.01925 |
| Ndrg4 | ENSMUSG00000036564 | -2.0313 |
| AC152063.2 | ENSMUSG00000097451 | -2.03185 |
| Paqr6 | ENSMUSG00000041423 | -2.03462 |
| Otop1 | ENSMUSG00000051596 | -2.03803 |
| Myom3 | ENSMUSG00000037139 | -2.04171 |
| Usp13 | ENSMUSG00000056900 | -2.04756 |
| Lama2 | ENSMUSG00000019899 | -2.05572 |
| Tmem100 | ENSMUSG00000069763 | -2.05586 |
| Gm11434 | ENSMUSG00000081342 | -2.06161 |
| Nefh | ENSMUSG00000020396 | -2.07078 |
| Gm12326 | ENSMUSG00000085251 | -2.07919 |
| Fam57b | ENSMUSG00000058966 | -2.08708 |
| Abca9 | ENSMUSG00000041797 | -2.09076 |
| Nrsn1 | ENSMUSG00000048978 | -2.11598 |
| Col19a1 | ENSMUSG00000026141 | -2.1256 |
| Ptprt | ENSMUSG00000053141 | -2.12584 |
| Rnf165 | ENSMUSG00000025427 | -2.12968 |
| Ces1g | ENSMUSG00000057074 | -2.13192 |
| Vipr1 | ENSMUSG00000032528 | -2.13626 |
| Mfap2 | ENSMUSG00000060572 | -2.14598 |
| Kcnq2 | ENSMUSG00000016346 | -2.16315 |
| Egflam | ENSMUSG00000042961 | -2.1649 |
| Gli2 | ENSMUSG00000048402 | -2.16937 |
| Sox10 | ENSMUSG00000033006 | -2.17176 |
| Gdf10 | ENSMUSG00000021943 | -2.18958 |
| Alpk3 | ENSMUSG00000038763 | -2.19481 |
| Npy | ENSMUSG00000029819 | -2.20877 |
| Adcyap1r1 | ENSMUSG00000029778 | -2.21234 |
| Gm13669 | ENSMUSG00000081833 | -2.21892 |
| Scn4a | ENSMUSG00000001027 | -2.22125 |
| Eya1 | ENSMUSG00000025932 | -2.23145 |
| Cdh11 | ENSMUSG00000031673 | -2.23546 |
| Zfp365 | ENSMUSG00000037855 | -2.23657 |
| Dnahc9 | ENSMUSG00000056752 | -2.23925 |
| Cntnap5a | ENSMUSG00000070695 | -2.24537 |
| Ptprn2 | ENSMUSG00000056553 | -2.25044 |
| Tbxa2r | ENSMUSG00000034881 | -2.2509 |
| Ntf3 | ENSMUSG00000049107 | -2.2664 |
| Lctl | ENSMUSG00000032401 | -2.28059 |
| Fasn | ENSMUSG00000025153 | -2.29386 |
| Tnnt3 | ENSMUSG00000061723 | -2.30092 |
| Prune2 | ENSMUSG00000039126 | -2.30228 |
| AW551984 | ENSMUSG00000038112 | -2.30239 |
| Mfsd2a | ENSMUSG00000028655 | -2.30623 |
| Faim2 | ENSMUSG00000023011 | -2.3107 |
| Proz | ENSMUSG00000031445 | -2.32672 |
| Prima1 | ENSMUSG00000041669 | -2.33437 |
| Kif1a | ENSMUSG00000014602 | -2.35497 |
| Iqsec3 | ENSMUSG00000040797 | -2.35691 |
| Mapk8ip2 | ENSMUSG00000022619 | -2.3585 |
| Tril | ENSMUSG00000043496 | -2.35946 |
| Smcp | ENSMUSG00000074435 | -2.36019 |
| Srpx2 | ENSMUSG00000031253 | -2.36617 |
| Prss35 | ENSMUSG00000033491 | -2.36991 |
| Trpc3 | ENSMUSG00000027716 | -2.41716 |
| Frem1 | ENSMUSG00000059049 | -2.42026 |
| Pkd1l1 | ENSMUSG00000046634 | -2.42302 |
| Nccrp1 | ENSMUSG00000047586 | -2.45999 |
| Sorcs2 | ENSMUSG00000029093 | -2.46349 |
| Scube1 | ENSMUSG00000016763 | -2.46985 |
| Gm906 | ENSMUSG00000095300 | -2.48002 |
| 5330416C01Rik | ENSMUSG00000054944 | -2.48771 |
| Mkx | ENSMUSG00000061013 | -2.52846 |
| Klhl4 | ENSMUSG00000025597 | -2.53968 |
| Cyp26b1 | ENSMUSG00000063415 | -2.5428 |
| Wdr86 | ENSMUSG00000055235 | -2.55275 |
| Cplx1 | ENSMUSG00000033615 | -2.55991 |
| Lin7b | ENSMUSG00000003872 | -2.57059 |
| 6330403K07Rik | ENSMUSG00000018451 | -2.57384 |
| Stmn4 | ENSMUSG00000022044 | -2.58245 |
| Gria4 | ENSMUSG00000025892 | -2.60073 |
| Baiap3 | ENSMUSG00000047507 | -2.62105 |
| Gjc2 | ENSMUSG00000043448 | -2.62815 |
| Alx1 | ENSMUSG00000036602 | -2.65092 |
| Lgr6 | ENSMUSG00000042793 | -2.68001 |
| Ankrd35 | ENSMUSG00000038354 | -2.68317 |
| Rph3a | ENSMUSG00000029608 | -2.69632 |
| Tbx10 | ENSMUSG00000037477 | -2.69911 |
| Ecel1 | ENSMUSG00000026247 | -2.69993 |
| Wnt2 | ENSMUSG00000010797 | -2.71395 |
| Nalcn | ENSMUSG00000000197 | -2.73297 |
| Plg | ENSMUSG00000059481 | -2.74317 |
| Vstm2l | ENSMUSG00000037843 | -2.75254 |
| Gm10384 | ENSMUSG00000072618 | -2.81285 |
| Cpne6 | ENSMUSG00000022212 | -2.8202 |
| C1qtnf2 | ENSMUSG00000046491 | -2.86776 |
| Doc2b | ENSMUSG00000020848 | -2.88232 |
| Sost | ENSMUSG00000001494 | -2.89358 |
| 1500015O10Rik | ENSMUSG00000026051 | -2.90538 |
| Slc29a4 | ENSMUSG00000050822 | -2.94154 |
| Meox2 | ENSMUSG00000036144 | -2.9541 |
| Thrsp | ENSMUSG00000035686 | -3.00677 |
| Lrtm1 | ENSMUSG00000045776 | -3.00678 |
| Syt1 | ENSMUSG00000035864 | -3.03272 |
| Ano5 | ENSMUSG00000055489 | -3.05113 |
| Stmn2 | ENSMUSG00000027500 | -3.08854 |
| Tnn | ENSMUSG00000026725 | -3.0922 |
| Hmcn1 | ENSMUSG00000066842 | -3.10368 |
| Tmem130 | ENSMUSG00000043388 | -3.11973 |
| Cntn1 | ENSMUSG00000055022 | -3.13523 |
| Hhip | ENSMUSG00000064325 | -3.18428 |
| Sv2c | ENSMUSG00000051111 | -3.24901 |
| Scg3 | ENSMUSG00000032181 | -3.27208 |
| Chgb | ENSMUSG00000027350 | -3.32056 |
| Gsg1l | ENSMUSG00000046182 | -3.44452 |
| Hephl1 | ENSMUSG00000031936 | -3.45492 |
| Cck | ENSMUSG00000032532 | -3.46677 |
| Gdf7 | ENSMUSG00000037660 | -3.51087 |
| D630023F18Rik | ENSMUSG00000044816 | -3.60512 |
| 5730588L14Rik | ENSMUSG00000086775 | -3.63049 |
| Gdap1 | ENSMUSG00000025777 | -3.66826 |
| Prph | ENSMUSG00000023484 | -3.67782 |
| Celf6 | ENSMUSG00000032297 | -3.68588 |
| 4930579F01Rik | ENSMUSG00000012042 | -3.68799 |
| Gap43 | ENSMUSG00000047261 | -3.72308 |
| Nefm | ENSMUSG00000022054 | -3.72866 |
| Ncan | ENSMUSG00000002341 | -3.72945 |
| Ucp1 | ENSMUSG00000031710 | -3.87632 |
| Elavl4 | ENSMUSG00000028546 | -3.93823 |
| Slc6a2 | ENSMUSG00000055368 | -4.02263 |
| AC123795.1 | ENSMUSG00000097767 | -4.02915 |
| Dner | ENSMUSG00000036766 | -4.07128 |
| Cadps | ENSMUSG00000054423 | -4.34504 |
| Pcsk1n | ENSMUSG00000039278 | -4.43537 |
| Hand2 | ENSMUSG00000038193 | -4.44555 |
| Nefl | ENSMUSG00000022055 | -4.51613 |
| Chrna3 | ENSMUSG00000032303 | -4.53103 |
| Slc10a4 | ENSMUSG00000029219 | -4.57328 |
| Syt4 | ENSMUSG00000024261 | -5.09634 |
| Rab3c | ENSMUSG00000021700 | -5.2764 |
| Eef1a2 | ENSMUSG00000016349 | -5.88925 |
| Snap25 | ENSMUSG00000027273 | -6.40093 |
| Dbh | ENSMUSG00000000889 | -7.0123 |
