# Supplementary material for: New signaling pathways govern the host response to C. albicans infection in various niches
Source: HighWire-hosted journal article supplement (doi:10.1101/gr.187427.114), 2015-04-09
Supplement: TableS8.docx [file TableS8.docx]

| **Table S8.** Results for Upstream Regulator Analysis for each of the *in vivo* mouse kidney infections. | | | | |
| --- | --- | --- | --- | --- |
|  |  |  |  |  |
| **Upstream Regulator** | **Molecule Type** | **Predicted Activation State** | **Activation z-score** | **p-value of overlap** |
| **IFNG** | cytokine | Activated | 8.378 | 4.69E-49 |
| **TNF** | cytokine | Activated | 8.256 | 3.28E-56 |
| **TGM2** | enzyme | Activated | 6.564 | 2.83E-27 |
| **NFkB (complex)** | complex | Activated | 6.087 | 3.54E-35 |
| **PDGF BB** | complex | Activated | 6.020 | 1.62E-26 |
| **IFNA2** | cytokine | Activated | 5.544 | 7.03E-21 |
| **IL1B** | cytokine | Activated | 5.440 | 3.65E-21 |
| **IFNL1** | cytokine | Activated | 5.367 | 7.17E-19 |
| **NUPR1** | transcription regulator | Activated | 5.259 | 1.24E-04 |
| **CSF2** | cytokine | Activated | 5.215 | 1.04E-13 |
| **IL1A** | cytokine | Activated | 4.979 | 1.99E-16 |
| **CD40LG** | cytokine | Activated | 4.889 | 7.39E-18 |
| **P38 MAPK** | group | Activated | 4.463 | 1.60E-19 |
| **RELA** | transcription regulator | Activated | 4.406 | 7.26E-23 |
| **PAF1** | other | Activated | 4.359 | 2.54E-11 |
| **TLR7** | transmembrane receptor | Activated | 4.259 | 6.74E-10 |
| **EZH2** | transcription regulator | Activated | 4.116 | 1.49E-07 |
| **EIF2AK2** | kinase | Activated | 3.929 | 2.30E-12 |
| **Interferon alpha** | group | Activated | 3.887 | 4.86E-11 |
| **FOXL2** | transcription regulator | Activated | 3.856 | 1.79E-09 |
| **F7** | peptidase | Activated | 3.825 | 7.24E-12 |
| **IL18** | cytokine | Activated | 3.663 | 3.65E-09 |
| **ERK** | group | Activated | 3.652 | 7.26E-14 |
| **SYVN1** | transporter | Activated | 3.638 | 6.26E-03 |
| **CD40** | transmembrane receptor | Activated | 3.611 | 1.27E-16 |
| **TLR4** | transmembrane receptor | Activated | 3.499 | 6.93E-08 |
| **IL5** | cytokine | Activated | 3.487 | 4.76E-09 |
| **CCL5** | cytokine | Activated | 3.450 | 8.71E-06 |
| **IL17A** | cytokine | Activated | 3.362 | 8.66E-11 |
| **TLR2** | transmembrane receptor | Activated | 3.358 | 3.64E-11 |
| **Ap1** | complex | Activated | 3.302 | 4.36E-09 |
| **RNASE1** | enzyme | Activated | 3.293 | 1.93E-08 |
| **FOXO3** | transcription regulator | Activated | 3.262 | 4.33E-06 |
| **MAP2K1/2** | group | Activated | 3.250 | 1.31E-05 |
| **IL6** | cytokine | Activated | 3.241 | 6.07E-15 |
| **IL27** | cytokine | Activated | 3.238 | 8.19E-15 |
| **RNASE2** | enzyme | Activated | 3.223 | 2.54E-10 |
| **MAP3K14** | kinase | Activated | 3.223 | 4.77E-10 |
| **Growth hormone** | group | Activated | 3.201 | 2.56E-07 |
| **PTGS2** | enzyme | Activated | 3.191 | 3.19E-10 |
| **JUN** | transcription regulator | Activated | 3.162 | 3.08E-14 |
| **Jnk** | group | Activated | 3.136 | 1.30E-13 |
| **Fcer1** | complex | Activated | 3.118 | 7.99E-07 |
| **FOXO1** | transcription regulator | Activated | 3.109 | 2.95E-03 |
| **SELPLG** | other | Activated | 3.051 | 1.09E-08 |
| **Immunoglobulin** | complex | Activated | 3.014 | 1.15E-14 |
| **STAT3** | transcription regulator | Activated | 2.873 | 4.59E-18 |
| **IFNAR2** | transmembrane receptor | Activated | 2.828 | 3.42E-07 |
| **Ifn gamma** | complex | Activated | 2.786 | 1.52E-06 |
| **IRF1** | transcription regulator | Activated | 2.784 | 6.59E-13 |
| **Akt** | group | Activated | 2.781 | 1.08E-09 |
| **IRF3** | transcription regulator | Activated | 2.764 | 4.39E-04 |
| **SP1** | transcription regulator | Activated | 2.762 | 3.87E-13 |
| **IL15** | cytokine | Activated | 2.740 | 1.85E-07 |
| **IL12 (complex)** | complex | Activated | 2.696 | 2.06E-12 |
| **PRKCD** | kinase | Activated | 2.693 | 5.01E-14 |
| **TP53** | transcription regulator | Activated | 2.654 | 4.76E-08 |
| **IL2** | cytokine | Activated | 2.634 | 7.19E-05 |
| **IFNB1** | cytokine | Activated | 2.634 | 3.59E-06 |
| **lymphotoxin-alpha1-beta2** | complex | Activated | 2.630 | 1.42E-06 |
| **FOS** | transcription regulator | Activated | 2.630 | 1.49E-05 |
| **P2RX7** | ion channel | Activated | 2.621 | 6.56E-06 |
| **TLR8** | transmembrane receptor | Activated | 2.619 | 5.87E-05 |
| **PF4** | cytokine | Activated | 2.615 | 3.21E-06 |
| **NCR2** | transmembrane receptor | Activated | 2.596 | 5.87E-05 |
| **CXCL12** | cytokine | Activated | 2.592 | 4.10E-02 |
| **Gm-csf** | group | Activated | 2.588 | 4.68E-05 |
| **EBI3** | cytokine | Activated | 2.538 | 2.78E-07 |
| **NEDD9** | other | Activated | 2.496 | 1.09E-07 |
| **TLR3** | transmembrane receptor | Activated | 2.478 | 1.90E-14 |
| **NANOG** | transcription regulator | Activated | 2.449 | 1.74E-01 |
| **OSCAR** | other | Activated | 2.449 | 5.84E-06 |
| **ICAM1** | transmembrane receptor | Activated | 2.449 | 5.47E-07 |
| **ULBP1** | transmembrane receptor | Activated | 2.449 | 5.47E-07 |
| **TSLP** | cytokine | Activated | 2.429 | 1.56E-04 |
| **IKBKB** | kinase | Activated | 2.429 | 3.72E-04 |
| **SMAD4** | transcription regulator | Activated | 2.423 | 1.73E-02 |
| **ELAVL1** | other | Activated | 2.416 | 3.30E-02 |
| **CDK9** | kinase | Activated | 2.415 | 1.40E-05 |
| **TLR1** | transmembrane receptor | Activated | 2.412 | 9.47E-05 |
| **TP73** | transcription regulator | Activated | 2.398 | 5.38E-02 |
| **TNFSF14** | cytokine | Activated | 2.393 | 5.84E-06 |
| **CD14** | transmembrane receptor | Activated | 2.377 | 8.19E-08 |
| **TGFB1** | growth factor | Activated | 2.357 | 9.50E-22 |
| **HMGB1** | transcription regulator | Activated | 2.319 | 4.96E-05 |
| **TCR** | complex | Activated | 2.297 | 4.94E-15 |
| **PLG** | peptidase | Activated | 2.283 | 4.94E-08 |
| **IKBKE** | kinase | Activated | 2.248 | 2.85E-06 |
| **MAVS** | other | Activated | 2.236 | 2.39E-04 |
| **SPI1** | transcription regulator | Activated | 2.236 | 3.74E-14 |
| **BCL11B** | other | Activated | 2.236 | 1.52E-03 |
| **ERBB2** | kinase | Activated | 2.222 | 3.42E-08 |
| **NGF** | growth factor | Activated | 2.219 | 2.39E-04 |
| **NLRC5** | transcription regulator | Activated | 2.219 | 2.39E-04 |
| **CREB1** | transcription regulator | Activated | 2.213 | 3.03E-05 |
| **APP** | other | Activated | 2.207 | 5.20E-03 |
| **NFKB1** | transcription regulator | Activated | 2.207 | 2.17E-15 |
| **MAP2K1** | kinase | Activated | 2.202 | 2.60E-05 |
| **NAMPT** | cytokine | Activated | 2.201 | 5.20E-03 |
| **TLR9** | transmembrane receptor | Activated | 2.200 | 2.96E-03 |
| **NRG1** | growth factor | Activated | 2.191 | 5.20E-03 |
| **RAF1** | kinase | Activated | 2.191 | 1.43E-03 |
| **SAA** | group | Activated | 2.189 | 2.36E-05 |
| **HMGA1** | transcription regulator | Activated | 2.186 | 6.05E-03 |
| **TREM1** | transmembrane receptor | Activated | 2.178 | 1.86E-22 |
| **PRKCA** | kinase | Activated | 2.157 | 4.99E-05 |
| **ITGAL** | transmembrane receptor | Activated | 2.155 | 1.26E-06 |
| **CEBPA** | transcription regulator | Activated | 2.150 | 1.02E-14 |
| **TP63** | transcription regulator | Activated | 2.109 | 9.76E-05 |
| **EGFR** | kinase | Activated | 2.093 | 4.63E-05 |
| **LDL** | complex | Activated | 2.071 | 5.40E-04 |
| **EGF** | growth factor | Activated | 2.067 | 2.86E-04 |
| **CEBPB** | transcription regulator | Activated | 2.048 | 8.27E-06 |
| **BCR (complex)** | complex | Activated | 2.033 | 2.09E-11 |
| **STAT1** | transcription regulator | Activated | 2.030 | 2.04E-13 |
| **KITLG** | growth factor | Activated | 2.013 | 9.09E-04 |
| **PRKCE** | kinase | Activated | 2.011 | 5.33E-06 |
| **IL3** | cytokine | Activated | 2.008 | 2.54E-10 |
| **IL1** | group | Activated | 2.000 | 1.82E-02 |
| **KDM3A** | transcription regulator | Activated | 2.000 | 9.02E-05 |
| **AGER** | transmembrane receptor | Activated | 2.000 | 4.31E-03 |
| **IGFBP5** | other | Activated | 2.000 | 2.89E-03 |
| **PML** | transcription regulator | Activated | 2.000 | 2.56E-04 |
| **HSPD1** | enzyme | Activated | 2.000 | 2.89E-03 |
| **ELF4** | transcription regulator | Activated | 2.000 | 1.82E-02 |
| **VTN** | other | Activated | 2.000 | 1.83E-03 |
| **TNFRSF18** | transmembrane receptor | Inhibited | -2.000 | 2.56E-04 |
| **GNE** | kinase | Inhibited | -2.000 | 9.02E-05 |
| **NFIL3** | transcription regulator | Inhibited | -2.000 | 1.26E-06 |
| **TRIB3** | kinase | Inhibited | -2.190 | 2.15E-03 |
| **TRAF3** | other | Inhibited | -2.345 | 2.22E-10 |
| **SCD** | enzyme | Inhibited | -2.390 | 5.84E-06 |
| **USP18** | peptidase | Inhibited | -2.390 | 2.06E-06 |
| **MAX** | transcription regulator | Inhibited | -2.449 | 1.69E-03 |
| **MNT** | transcription regulator | Inhibited | -2.449 | 5.84E-06 |
| **SIN3A** | transcription regulator | Inhibited | -2.449 | 2.32E-09 |
| **SOCS3** | phosphatase | Inhibited | -2.619 | 2.19E-05 |
| **IgG** | complex | Inhibited | -2.656 | 2.00E-14 |
| **S100A6** | transporter | Inhibited | -2.828 | 2.56E-04 |
| **MAP3K7** | kinase | Inhibited | -2.840 | 2.68E-11 |
| **miR-146a-5p (and other miRNAs w/seed GAGAACU)** | mature microrna | Inhibited | -2.891 | 1.49E-05 |
| **CD28** | transmembrane receptor | Inhibited | -2.971 | 1.51E-05 |
| **miR-155-5p (miRNAs w/seed UAAUGCU)** | mature microrna | Inhibited | -3.108 | 6.75E-06 |
| **Hdac** | group | Inhibited | -3.264 | 1.27E-08 |
| **SOCS1** | other | Inhibited | -3.420 | 2.61E-09 |
| **COL18A1** | other | Inhibited | -3.428 | 1.96E-13 |
| **JAG2** | growth factor | Inhibited | -3.571 | 1.81E-08 |
| **TAB1** | enzyme | Inhibited | -3.742 | 5.54E-12 |
| **CD3** | complex | Inhibited | -4.111 | 9.44E-07 |
| **MAPK1** | kinase | Inhibited | -5.218 | 7.05E-22 |
| **IL1RN** | cytokine | Inhibited | -5.807 | 1.66E-22 |
