# Supplementary material for: New signaling pathways govern the host response to C. albicans infection in various niches
Source: HighWire-hosted journal article supplement (doi:10.1101/gr.187427.114), 2015-04-09
Supplement: TableS9.docx [file TableS9.docx]

| **Table S9.** RNA-seq mapping statistics for vaginal swabs. | | | |
| --- | --- | --- | --- |
| NS = no symptoms | |  |  |
| VC = clinically diagnosed episode of Vaginal Candidiasis | | | |
|  |  |  |  |
| **Subject #** | **Status** | **Total Reads Obtained** | **# of reads that mapped to Human genome** |
| 12 | NS | 21,884,866 | 9,853,538 |
| 12 | VC | 31,317,770 | 21,357,507 |
| 40 | NS | 75,754,972 | 33,485,673 |
| 40 | VC | 20,930,318 | 7,251,005 |
