# Supplementary material for: New signaling pathways govern the host response to C. albicans infection in various niches
Source: HighWire-hosted journal article supplement (doi:10.1101/gr.187427.114), 2015-04-09
Supplement: TableS10.docx [file TableS10.docx]

**Table S10. *C. albicans* strains used in this study.**

| **Strain** | **Genotype** | **Reference** |
| --- | --- | --- |
| CAYF178U | ura3 Δ::λ imm434::URA3-IRO1 als3::ARG4 arg4::hisG his1::hisG ura3 Δ::λ imm434 als3::HIS1 arg4::hisG his1::hisG | 1 |
| CAQTP178U | ura3Δ::λ imm434::URA3-IRO als3::ARG4::ALS3 arg4::hisG his1::hisG ura3Δ::λ imm434 als3::HIS1 arg4::hisG his1::hisG | 1 |
| HLC52 | ura3Δ::imm434/ura3Δ::imm434, efg1Δ::hisG/efg1Δ::hisG-URA3-hisG | 2 |
| HLC74 | ura3Δ::imm434/ura3Δ::imm434, efg1Δ::hisG/efg1Δ::hisG (EFG1) | 2 |
| NGY357 | och1Δ::hisG/och1Δ::hisG, RPS1/rps1Δ::CIp10 | 3 |
| NGY358 | och1Δ::hisG/och1Δ::hisG, RPS1/rps1Δ::CIp10-OCH1 | 3 |

1. **Nobile CJ, Andes DR, Nett JE, Smith FJ, Yue F, et al.** 2006. Critical role of Bcr1-dependent adhesins in C. albicans biofilm formation in vitro and in vivo. PLoS Pathog **2:** e63.

2. **Lo HJ, Köhler, JR, DiDomenico B, Loebenberg D, Cacciapuoti A, Fink GR.** 1997. Nonfilamentous C. albicans mutants are avirulent. Cell **90:** 939–949.

3. **Bates S, Hughes HB, Munro CA, Thomas WP, MacCallum DM, Bertram G, Atrih A, Ferguson MA, Brown AJ, Odds FC, Gow NA.** 2006. Outer chain N-glycans are required for cell wall integrity and virulence of Candida albicans. J Bio. Chem **281:** 90-98.
