# Supplementary material for: New signaling pathways govern the host response to C. albicans infection in various niches
Source: HighWire-hosted journal article supplement (doi:10.1101/gr.187427.114), 2015-04-09
Supplement: TableS11.docx [file TableS11.docx]

**Table S11. Oligos used to qRT-PCR.**

| Primer Name | Primer sequence (5’ to 3’) |
| --- | --- |
| PDGF-B-f | GCACCGAGGTGTTCGAGAT |
| PDGF-B-r | CTGCACGTTGCGGTTGTT |
| PPP1R15A-f | TAAGGACACTGCAAGGTTCTGA |
| PPP1R15A-r | AGCTTCTTCATCGTCCTCCTC |
| SOCS3-f | GTCCCCCCAGAAGAGCCTA |
| SOCS3-r | GCTGGGTGACTTTCTCATAGGA |
| DUSP1-f | CGCTCCTTCTTCGCTTTCA |
| DUSP1-r | GCGCTCGTCCAGCAACA |
| NR4A3-f | GAATACACCACGGAGATCATGA |
| NR4A3-r | GGAAGGCTTGAGTTCGTAGTTG |
| NEDD9-f | CCCGAGGCGTTCAGTTTC |
| NEDD9-r | TCCCATCCACCAAGTCCC |
| DDIT4-f | TCGCCCTCGTCCTTGC |
| DDIT4-r | CCACTGTTGCTGCTGTCCA |
| PTGS2-f | TGGAAGAGGGAGAAAATGAAATA |
| PTGS2-r | CACTGAAACATTCGCATACACA |
